# Supplementary material for: Palladium-catalyzed formal arylacylation of allenes employing acid chlorides and arylboronic acids
Source: Royal Society of Chemistry journal article supplement (doi:10.1039/c4cc03173c), 2014-01-01
Supplement: c4cc03173c1.pdf [file c4cc03173c1.pdf]

## Supporting Information

### **Palladium-catalyzed formal arylacylation of allenes employing acid chlorides and arylboronic acids**

**Kenta Tatsumi, Tetsuaki Fujihara,\* Jun Terao, and Yasushi Tsuji\***

*Department of Energy and Hydrocarbon Chemistry, Graduate School of Engineering, Kyoto University, Kyoto 615-8510, Japan. [tfuji@scl.kyoto-u.ac.jp](mailto:tfuji@scl.kyoto-u.ac.jp), [ytsuji@scl.kyoto-u.ac.jp](mailto:ytsuji@scl.kyoto-u.ac.jp)*

### Table of Contents

|                                            |    |
|--------------------------------------------|----|
| 1. Instrument.....                         | 2  |
| 2. Preparation of Substrate.....           | 2  |
| 3. Experimental Procedure.....             | 3  |
| 4. Characterization of the Compounds. .... | 7  |
| 5. NMR Charts.....                         | 15 |
| 6. Reference.....                          | 43 |

## 1. Instrument

All manipulations were performed under an atmosphere of argon, using standard Schlenk-type glasswares on a dual-manifold Schlenk line. All solvents were dried and purified by usual procedures.<sup>1</sup>  $^1\text{H}$  and  $^{13}\text{C}\{^1\text{H}\}$  NMR were measured with a JEOL ECX-400 spectrometer. The  $^1\text{H}$  NMR chemical shifts are reported relative to tetramethylsilane (TMS, 0.00 ppm) or residual protiated solvent (7.26 ppm) in  $\text{CDCl}_3$ . The  $^{13}\text{C}$  NMR chemical shifts are reported relative to  $\text{CDCl}_3$  (77.0 ppm). EI-MS were recorded on a Shimadzu GCMS-QP2010. IR spectra were obtained on Shimadzu IRTracer-100 FT-IR Spectrometer equipped with Shimadzu MIRacle A (Ge) Single Reflection HATR. APCI-HRMS were obtained with Thermo Scientific Exactive. Elemental analysis was carried out at Center for Organic Elemental Microanalysis, Graduate School of Pharmaceutical Science, Kyoto University. Melting points were measured on a Yanako MP-J3 apparatus. Medium pressure liquid chromatography (MPLC) was performed on Biotage Isorera One with a silica gel column (Biotage SNAP Ultra 25 g, HP-Sphere 25 $\mu\text{m}$ ). Preparative recycling GPC was performed with SHIMADZU LC-20AP System equipped with Shodex K-4002.5L column, a SHIMADZU SPD-20A, and SHIMADZU RID-10A using  $\text{CHCl}_3$  as the eluent at a flow rate of 14 mL  $\text{min}^{-1}$ . GC analysis was carried out using Shimadzu GC-17A with a capillary column (CBP-5, 0.25 mm i.d.  $\times$  25  $\mu\text{m}$ ).

## 2. Preparation of Substrate

Unless otherwise noted, commercially available chemicals were used as received. Anhydrous toluene was purchased from Kanto Chemical and further purified by passage through activated alumina under positive argon pressure as described by Grubbs et al.<sup>2</sup>

$\text{Pd}_2(\text{dba})_3 \cdot \text{CHCl}_3$  was synthesized according to a literature.<sup>3</sup>  $\text{CuCl}$  was purified according to a literature.<sup>1</sup> Acid chlorides **1a–j** were used after distillation under vacuum. Boronic acids **3a–i** were used after recrystallization from water. Allenes **2a–e**,<sup>4</sup> **2f** and **2g**<sup>5</sup> were synthesized according to literatures.

### Preparation of **2d**

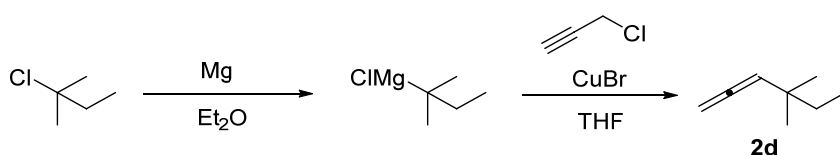

Mg turnings (8.76 g, 360 mmol) were activated by evacuation and heating with stirring in a flask equipped with a reflux condenser and a dropping funnel. The flask was backfilled with argon and  $\text{Et}_2\text{O}$  (15 mL) was added. Then, *t*-amyl chloride (37.2 mL, 300 mmol) was transferred to the dropping funnel. After, a small portion of *t*-amyl chloride was added to the reaction flask (ca. 1 mL), the remaining *t*-amyl chloride was diluted with  $\text{Et}_2\text{O}$  (45 mL) in the dropping funnel. The solution was slowly added to the flask in 2 h. Then, the reaction mixture was stirred under reflux for 1 h. The mixture was filtered with a Celite pad to afford Grignard-reagent solution. Next, a mixture of propargyl chloride (12.6 mL, 175 mmol) and CuBr (1.0 g, 7.0 mmol) in THF (120 mL) was cooled to  $-40\text{ }^\circ\text{C}$ . Then, the Grignard-reagent solution was added dropwise in 1 h and stirred at  $-40\text{ }^\circ\text{C}$  for 30 min. The resulting mixture was slowly warmed up to room temperature and stirred overnight at room temperature. The reaction mixture was poured

into NH<sub>4</sub>Cl aq. The product was extracted with Et<sub>2</sub>O, dried over MgSO<sub>4</sub>, and evaporated in vacuo. After distillation (200 tor, 30–40 °C), **2d** was obtained in 34 % yield (6.61 g, 60 mmol).

**<sup>1</sup>H NMR (400 MHz, CDCl<sub>3</sub>)**  $\delta$ : 5.02 (t, *J* = 6.6 Hz, 1H), 4.70 (d, *J* = 6.8 Hz, 2H), 1.34 (q, *J* = 7.6 Hz, 2H), 0.99 (s, 6H), 0.84 (t, *J* = 7.5 Hz, 3H). **<sup>13</sup>C NMR (100 MHz, CDCl<sub>3</sub>)**  $\delta$ : 206.70, 100.34, 76.02, 35.63, 34.32, 27.31, 8.98. **IR (ATR)**: 839.0, 869.9, 1014.6, 1057.0, 1095.6, 1261.5, 1462.0, 1955.8, 2964.6 cm<sup>-1</sup>. **HRMS (APCI)**: Calcd. for C<sub>8</sub>H<sub>15</sub> ([M+H]<sup>+</sup>), 111.1168. Found, 111.1173.

### 3. Experimental Procedure

#### 3.1. Typical procedure in Table 1 (Entry 1)

To a 10-mL Schlenk flask with a reflux condenser was added K<sub>3</sub>PO<sub>4</sub>·H<sub>2</sub>O (92 mg, 0.40 mmol), and the whole system was dried under evacuation and heating with stirring. The flask was backfilled with argon and Pd<sub>2</sub>(dba)<sub>3</sub>·CHCl<sub>3</sub> (10.3 mg, 0.010 mmol, 5.0 mol %), CuCl (0.020 mmol, 10 mol %) and phenylboronic acid (**3a**, 36.6 mg, 0.30 mmol) were charged. The flask was evacuated and backfilled with argon three times. Then, toluene (3.6 mL) and MeCN (0.4 mL) were added to the flask. To the mixture, H<sub>2</sub>O (14  $\mu$ L, 0.80 mmol), cyclohexylallene (**2a**, 30  $\mu$ L, 0.20 mmol) and 3-phenylpropionyl chloride (**1a**, 60  $\mu$ L, 0.40 mmol) were added in this order, and the mixture was stirred at 50 °C for 3 h. After cooling to room temperature, the reaction mixture was analyzed by GC using tetradecane (50  $\mu$ L) as an internal standard.

Regarding the isolation of (*E*)-**4a**, the reaction mixture was filtrated through a pad of silica gel and all volatiles were removed in vacuo. (*E*)-**4a** was obtained by MPLC (Hexane/EtOAc = 98/2) in 80% yield. The stereochemistry of the product (*E*)-**4a** was determined by 2D NMR measurements (See pages S41).

#### 3.2. Effect of base and additives

To a 10-mL Schlenk flask with a reflux condenser was added a base (0.40 mmol), and the whole system was dried under evacuation and heating with stirring. The flask was backfilled with argon, then Pd<sub>2</sub>(dba)<sub>3</sub>·CHCl<sub>3</sub> (10.3 mg, 0.010 mmol, 5.0 mol %), an additive (0.020 mmol, 10 mol %) and phenylboronic acid (**3a**, 36.6 mg, 0.30 mmol) were charged. The flask was evacuated and backfilled with argon three times. Then, toluene (3.6 mL) and MeCN (0.4 mL) were added to the flask. To the mixture, H<sub>2</sub>O (14  $\mu$ L, 0.80 mmol), cyclohexylallene (**2a**, 30  $\mu$ L, 0.20 mmol) and 3-phenylpropionyl chloride (**1a**, 60  $\mu$ L, 0.40 mmol) were added in this order, and the mixture was stirred at 50 °C for 3 h. After cooling to room temperature, the reaction mixture was analyzed by GC using tetradecane (50  $\mu$ L) as an internal standard.

**Table S1.** Effect of bases<sup>a</sup>

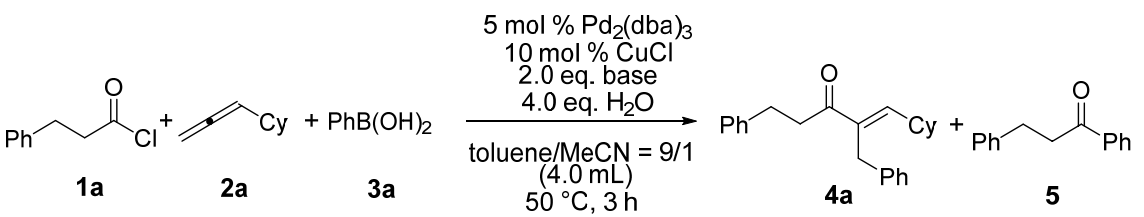

| <b>4a</b> |                                 |                                           |                                                    |                 |
|-----------|---------------------------------|-------------------------------------------|----------------------------------------------------|-----------------|
| Entry     | Base                            | Total Yield of <b>4a</b> (%) <sup>b</sup> | ( <i>E</i> )- <b>4a</b> /Other Isomer <sup>c</sup> | <b>5</b> (mmol) |
| 1         | K <sub>3</sub> PO <sub>4</sub>  | 86 (80) <sup>d</sup>                      | 96/4                                               | 0.034           |
| 2         | Na <sub>3</sub> PO <sub>4</sub> | 53                                        | 97/3                                               | 0.030           |
| 3         | K <sub>2</sub> CO <sub>3</sub>  | 32                                        | 96/4                                               | 0.019           |
| 4         | Cs <sub>2</sub> CO <sub>3</sub> | 67                                        | 97/3                                               | 0.020           |
| 5         | Na <sub>2</sub> CO <sub>3</sub> | 47                                        | 97/3                                               | 0.018           |
| 6         | KOAc                            | 13                                        | -                                                  | 0.004           |
| 7         | KF                              | 35                                        | 97/3                                               | 0.015           |
| 8         | KOH                             | 42                                        | 96/4                                               | 0.016           |
| 9         | KOtBu                           | 40                                        | 96/4                                               | 0.020           |

<sup>a</sup> Reaction conditions: 3-phenylpropionyl chloride (**1a**, 0.40 mmol), cyclohexylallene (**2a**, 0.20 mmol), phenylboronic acid (**3a**, 0.30 mmol), Pd<sub>2</sub>(dba)<sub>3</sub>·CHCl<sub>3</sub> (0.010 mmol, 5.0 mol %), CuCl (0.020 mmol, 10 mol %), base (0.40 mmol), H<sub>2</sub>O (0.80 mmol) in toluene/MeCN = 9/1 (4.0 mL), at 50 °C, for 3 h. <sup>b</sup> Yield by the GC internal standard method. <sup>c</sup> Determined by GC. <sup>d</sup> Isolated yield of (*E*)-**4a**.

**Table S2.** Effect of additives<sup>a</sup>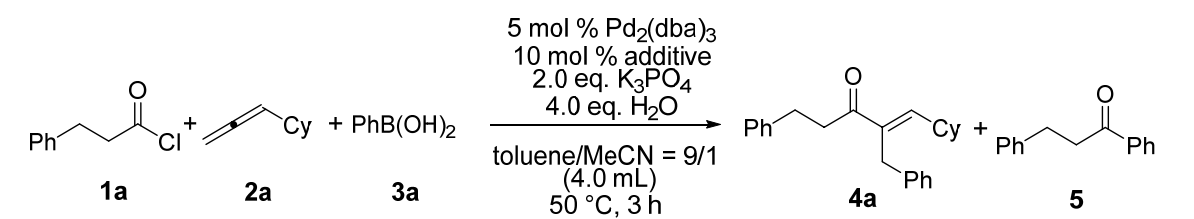

| Entry | Additive           | Total Yield of <b>4a</b> (%) <sup>b</sup> | ( <i>E</i> )- <b>4a</b> /Other Isomer <sup>c</sup> | <b>5</b> (mmol) |
|-------|--------------------|-------------------------------------------|----------------------------------------------------|-----------------|
| 1     | None               | 31                                        | 96/4                                               | 0.014           |
| 2     | CuCl               | 86 (80) <sup>d</sup>                      | 96/4                                               | 0.034           |
| 3     | CuBr               | 61                                        | 97/3                                               | 0.024           |
| 4     | CuI                | 73                                        | 94/6                                               | 0.023           |
| 5     | CuOAc              | 52                                        | 96/4                                               | 0.025           |
| 6     | CuCl <sub>2</sub>  | 79                                        | 96/4                                               | 0.043           |
| 7     | CuBr <sub>2</sub>  | 78                                        | 96/4                                               | 0.042           |
| 8     | CuOAc <sub>2</sub> | 79                                        | 96/4                                               | 0.024           |

<sup>a</sup> Reaction conditions: 3-phenylpropionyl chloride (**1a**, 0.40 mmol), cyclohexylallene (**2a**, 0.20 mmol), phenylboronic acid (**3a**, 0.30 mmol), Pd<sub>2</sub>(dba)<sub>3</sub>·CHCl<sub>3</sub> (0.010 mmol, 5.0 mol %), additive (0.020 mmol, 10 mol %), K<sub>3</sub>PO<sub>4</sub> (0.40 mmol), H<sub>2</sub>O (0.80 mmol) in toluene/MeCN = 9/1 (4.0 mL), at 50 °C, for 3 h. <sup>b</sup> Yield by the GC internal standard method. <sup>c</sup> Determined by GC. <sup>d</sup> Isolated yield of (*E*)-**4a**.

### 3.3. General procedure in Table 2

To a 10-mL Schlenk flask with a reflux condenser was added K<sub>3</sub>PO<sub>4</sub>·H<sub>2</sub>O (92 mg, 0.40 mmol), and the whole system was dried under evacuation and heating with stirring. The flask was backfilled with argon, then Pd<sub>2</sub>dba<sub>3</sub>·CHCl<sub>3</sub> (10.3 mg, 0.010 mmol, 5.0 mol %), CuCl (2.0 mg, 0.020 mmol, 10 mol %) and phenylboronic acid (**3a**, 36.6 mg, 0.30 mmol) were charged. The flask was evacuated and backfilled with argon three times. Then, toluene (3.6 mL) and MeCN (0.4 mL) were added to the flask. To the mixture, H<sub>2</sub>O, cyclohexylallene (**2a**, 30 μL, 0.20 mmol) and acid chloride (0.40 mmol) were added in this order, and the mixture was stirred at 50 °C for 3 h. After cooling to room temperature, all volatiles were removed in vacuo. The product was isolated by MPLC or preparative recycling GPC. The stereochemistry of the product **4b–j** was determined by 2D NMR measurements. As typical examples, NOESY spectra of **4g** and **4h** was shown in Section 5 (See pages S41 and S42).

### 3.4. General procedure in Table 3

To a 10-mL Schlenk flask with a reflux condenser was added K<sub>3</sub>PO<sub>4</sub>·H<sub>2</sub>O (92 mg, 0.40 mmol), and the whole system was dried under evacuation and heating with stirring. The flask was backfilled with argon, then

$\text{Pd}_2\text{dba}_3 \cdot \text{CHCl}_3$  (10.3 mg, 0.010 mmol, 5.0 mol %),  $\text{CuCl}$  (2.0 mg, 0.020 mmol, 10 mol %) and phenylboronic acid (**3a**, 36.6 mg, 0.30 mmol) were charged. The flask was evacuated and backfilled with argon three times. Then, toluene (3.6 mL) and MeCN (0.4 mL) were added to the flask. To the mixture,  $\text{H}_2\text{O}$ , allene (0.20 mmol) and 3-phenylpropionyl chloride (**1a**, 60  $\mu\text{L}$ , 0.40 mmol) were added in this order, and the mixture was stirred at 50 °C for 3 h. After cooling to room temperature, all volatiles were removed in vacuo. The product was isolated by MPLC or preparative recycling GPC. The stereochemistry of the product **4k–p** was determined by 2D NMR measurements. As a typical example, a NOESY spectrum of **4n** was shown in Section 5 (See page S42).

### 3.5. General procedure in Table 4

To a 10-mL Schlenk flask with a reflux condenser was added  $\text{K}_3\text{PO}_4 \cdot \text{H}_2\text{O}$  (92 mg, 0.40 mmol), and the whole system was dried under evacuation and heating with stirring. The flask was backfilled with argon, then  $\text{Pd}_2\text{dba}_3 \cdot \text{CHCl}_3$  (10.3 mg, 0.010 mmol, 5.0 mol %),  $\text{CuCl}$  (2.0 mg, 0.020 mmol, 10 mol %) and boronic acid (0.30 mmol) were charged. The flask was evacuated and backfilled with argon three times. Then, toluene (3.6 mL) and MeCN (0.4 mL) were added to the flask. To the mixture,  $\text{H}_2\text{O}$ , cyclohexylallene (**2a**, 30  $\mu\text{L}$ , 0.20 mmol) and 3-phenylpropionyl chloride (**1a**, 60  $\mu\text{L}$ , 0.40 mmol) were added in this order, and the mixture was stirred at 50 °C for 3 h. After cooling to room temperature, all volatiles were removed in vacuo. The product was isolated by MPLC or preparative recycling GPC. The stereochemistry of the product **4q–x** was determined by 2D NMR measurements. As a typical example, a NOESY spectrum of **4x** was shown in Section 5 (See page S43).

#### 4. Characterization of the Compounds.

(*E*)-2-benzyl-1-cyclohexyl-5-phenylpent-1-en-3-one (**4a**)

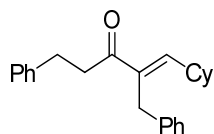

Isolated by MPLC (hexane/EtOAc = 98/2). Colorless oil. 53.3 mg, 80% yield.  $^1\text{H NMR}$  (400 MHz,  $\text{CDCl}_3$ )  $\delta$ : 7.28-7.10 (m, 10H), 6.52 (d,  $J = 9.5$  Hz, 1H), 3.69 (s, 2H), 2.98-2.93 (m, 2H), 2.90-2.85 (m, 2H), 2.48 (tdt,  $J = 10.9, 10.0, 3.6$  Hz, 1H), 1.76-1.55 (m, 5H), 1.33-1.06 (m, 5H).  $^{13}\text{C NMR}$  (100 MHz,  $\text{CDCl}_3$ )  $\delta$ : 200.66, 148.93, 141.53, 140.23, 138.13, 128.41, 128.38, 128.29, 128.17, 125.96, 125.77, 39.37, 38.35, 32.03, 31.41, 30.63, 25.74, 25.41. **IR (ATR)**: 902.7, 974.1, 1030.0, 1074.4, 1126.4, 1178.5, 1450.5, 1494.8, 1602.9, 1633.7, 1668.4, 2850.8, 2926.0, 3026.3  $\text{cm}^{-1}$ . **HRMS (APCI)**: Calcd. for  $\text{C}_{24}\text{H}_{29}\text{O}$  ( $[\text{M}+\text{H}]^+$ ), 333.2213. Found, 333.2200.

(*E*)-2-benzyl-1-cyclohexyldec-1-en-3-one (**4b**)

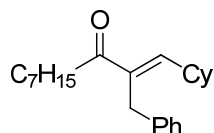

Isolated by MPLC (hexane/EtOAc = 98/2). Colorless oil. 52.2 mg, 80% yield.  $^1\text{H NMR}$  (400 MHz,  $\text{CDCl}_3$ )  $\delta$ : 7.25-7.20 (m, 2H), 7.15-7.11 (m, 3H), 6.53 (d,  $J = 9.5$  Hz, 1H), 3.68 (s, 2H), 2.61 (t,  $J = 7.5$  Hz, 2H), 2.49 (tdt,  $J = 10.9, 10.0, 3.6$  Hz, 1H), 1.77-1.51 (m, 7H), 1.33-1.12 (m, 13H), 0.86 (t,  $J = 6.8$  Hz, 3H).  $^{13}\text{C NMR}$  (100 MHz,  $\text{CDCl}_3$ )  $\delta$ : 202.12, 148.34, 140.36, 138.24, 128.23, 128.16, 125.70, 38.31, 37.50, 32.10, 31.66, 31.41, 29.22, 29.07, 25.77, 25.44, 24.88, 22.56, 14.04. **IR (ATR)**: 734.9, 900.8, 972.1, 1030.0, 1074.4, 1132.2, 1450.5, 1494.8, 1668.4, 2852.7, 2926.0  $\text{cm}^{-1}$ . **Anal.** Calcd. for  $\text{C}_{23}\text{H}_{34}\text{O}$ : C, 84.60; H, 10.50. Found: C, 84.64; H, 10.64. **EIMS**:  $m/z$  327 (26%,  $[\text{M}+1]^+$ ), 326 (100,  $[\text{M}]^+$ ), 243 (76), 227 (82), 117 (74), 91 (96).

(*E*)-3-benzyl-4-cyclohexyl-1-phenylbut-3-en-2-one (**4c**)

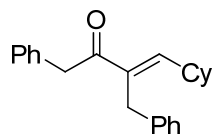

Isolated by MPLC (hexane/EtOAc = 98/2). Pale yellow oil. 51.2 mg, 80% yield.  $^1\text{H NMR}$  (400 MHz,  $\text{CDCl}_3$ )  $\delta$ : 7.28-7.03 (m, 10H), 6.66 (d,  $J = 10.0$  Hz, 1H), 3.95 (s, 2H), 3.67 (s, 2H), 2.48 (tdt,  $J = 10.9, 10.0, 3.6$  Hz, 1H), 1.76-1.56 (m, 5H), 1.32-1.09 (m, 5H).  $^{13}\text{C NMR}$  (100 MHz,  $\text{CDCl}_3$ )  $\delta$ : 199.19, 150.01, 139.96, 137.65, 135.32, 129.25, 128.40, 128.21, 128.14, 126.50, 125.72, 44.64, 38.37, 31.96, 31.47, 25.72, 25.33. **IR (ATR)**: 746.5, 974.1, 1030.0, 1074.4, 1122.6, 1450.5, 1494.8, 1602.9, 1664.6, 2850.8, 2926.0  $\text{cm}^{-1}$ . **HRMS (APCI)**: Calcd. for  $\text{C}_{23}\text{H}_{27}\text{O}$  ( $[\text{M}+\text{H}]^+$ ), 319.2056. Found, 319.2053.

(*E*)-3-benzyl-4-cyclohexyl-1-phenoxybut-3-en-2-one (**4d**)

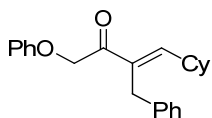

Isolated by preparative recycling GPC. Pale yellow oil. 56.0 mg, 84% yield.  $^1\text{H NMR}$  (400 MHz,  $\text{CDCl}_3$ )  $\delta$ : 7.24-7.18 (m, 4H), 7.17-7.09 (m, 3H), 6.93 (tt,  $J = 7.5, 1.1$  Hz, 1H), 6.80-6.75 (m, 2H), 6.63 (d,  $J = 10.0$  Hz, 1H), 4.92 (s, 2H), 3.71 (s, 2H), 2.53 (tdt,  $J = 10.9, 10.4, 3.6$  Hz, 1H), 1.77-1.60 (m, 5H), 1.33-1.12 (m, 5H).  $^{13}\text{C NMR}$  (100 MHz,  $\text{CDCl}_3$ )  $\delta$ : 196.08, 157.93, 149.85, 139.60, 136.32, 129.43, 128.38, 128.24, 125.96, 121.32, 114.68, 70.27, 38.33, 31.93, 31.45, 25.70, 25.36. **IR (ATR)**: 752.2, 785.0, 1030.0, 1130.3, 1174.7, 1230.6, 1450.5, 1494.8, 1599.0, 1631.8, 1687.7, 2850.8, 2926.0  $\text{cm}^{-1}$ . **Anal.** Calcd. for  $\text{C}_{23}\text{H}_{26}\text{O}_2$ : C, 82.60; H, 7.84. Found: C, 82.86; H, 7.99. **EIMS**:  $m/z$  334 (9%,  $[\text{M}]^+$ ), 227 (100), 117 (50), 91 (59).

methyl (*E*)-5-benzyl-6-cyclohexyl-4-oxohex-5-enoate (**4e**)

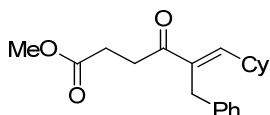

Isolated by MPLC (hexane/EtOAc = 95/5). Colorless oil. 43.5 mg, 69% yield.  $^1\text{H NMR}$  (400 MHz,  $\text{CDCl}_3$ )  $\delta$ : 7.25-7.20 (m, 2H), 7.16-7.11 (m, 3H), 6.62 (d,  $J = 10.0$  Hz, 1H), 3.69 (s, 2H), 3.65 (s, 3H), 3.00 (t,  $J = 6.8$  Hz, 2H), 2.58 (t,  $J = 6.8$  Hz, 2H), 2.50 (tdt,  $J = 10.9, 10.4, 3.6$  Hz, 1H), 1.79-1.57 (m, 5H), 1.34-1.11 (m, 5H).  $^{13}\text{C NMR}$  (100 MHz,  $\text{CDCl}_3$ )  $\delta$ : 199.21, 173.51, 149.16, 140.09, 137.75, 128.25, 128.04, 125.74, 51.62, 38.32, 32.30, 31.98, 31.37, 28.18, 25.70, 25.37. **IR (ATR)**: 842.9, 902.7, 1030.0, 1076.3, 1126.4, 1166.9, 1215.2, 1361.7, 1437.0, 1450.5, 1494.8, 1670.4, 1737.9, 2850.8, 2926.0  $\text{cm}^{-1}$ . **HRMS (APCI)**: Calcd. for  $\text{C}_{20}\text{H}_{27}\text{O}_3$  ( $[\text{M}+\text{H}]^+$ ), 315.1955. Found, 315.1951.

(*E*)-2-benzyl-1,3-dicyclohexylprop-2-en-1-one (**4f**)

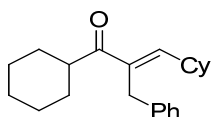

Isolated by MPLC (hexane/EtOAc = 98/2). Colorless oil. 37.5 mg, 60% yield.  $^1\text{H NMR}$  (400 MHz,  $\text{CDCl}_3$ )  $\delta$ : 7.25-7.20 (m, 2H), 7.14-7.10 (m, 3H), 6.49 (d,  $J = 10.0$  Hz, 1H), 3.68 (s, 2H), 2.98 (tt,  $J = 11.1, 3.2$  Hz, 1H), 2.50 (tdt,  $J = 10.9, 10.0, 3.9$  Hz, 1H), 1.77-1.60 (m, 10H), 1.37-1.12 (m, 10H).  $^{13}\text{C NMR}$  (100 MHz,  $\text{CDCl}_3$ )  $\delta$ : 205.39, 147.57, 140.43, 137.22, 128.20, 128.14, 125.65, 44.38, 38.34, 32.13, 31.52, 29.71, 25.89, 25.83, 25.78, 25.47. **IR (ATR)**: 734.9, 821.7, 906.5, 1030.0, 1074.4, 1118.7, 1141.9, 1255.7, 1311.6, 1450.5, 1494.8, 1664.6, 2852.7, 2926.0  $\text{cm}^{-1}$ . **Anal.** Calcd. for  $\text{C}_{22}\text{H}_{30}\text{O}$ : C, 85.11; H, 9.74. Found: C, 84.91; H, 9.70. **EIMS**:  $m/z$  310 (52%,  $[\text{M}]^+$ ), 227 (100), 117 (42), 91 (40).

(*E*)-2-benzyl-1-cyclohexyl-4,4-dimethylpent-1-en-3-one (**4g**)

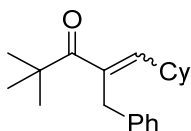



Isolated by preparative recycling GPC as mixture of inseparable isomers (*E/Z* = 89/11). Colorless oil. 32.4 mg, 57% yield. **<sup>1</sup>H NMR (400 MHz, CDCl<sub>3</sub>)** δ: 7.30-7.12 (m, 5H), 6.09 (d, *J* = 9.5 Hz, 1H), 3.66 (s, 2H), 2.46 (tdt, *J* = 10.9, 9.5, 3.4 Hz, 1H), 1.79-1.59 (m, 5H), 1.36-1.07 (m, 5H), 1.11 (s, 9H). **<sup>13</sup>C NMR (100 MHz, CDCl<sub>3</sub>)** δ: 210.51, 142.27, 139.82, 136.86, 128.49, 128.25, 125.87, 43.79, 37.80, 33.92, 32.47, 28.55, 25.84, 25.53. **IR (ATR):** 742.6, 902.7, 966.3, 1030.0, 1074.4, 1114.9, 1365.6, 1394.5, 1450.5, 1477.5, 1494.8, 1672.3, 2850.8, 2926.0 cm<sup>-1</sup>. **Anal.** Calcd. for C<sub>20</sub>H<sub>28</sub>O: C, 84.45; H, 9.92. Found: C, 84.33; H, 9.96. **HRMS (APCI):** Calcd. for C<sub>20</sub>H<sub>29</sub>O ([M+H]<sup>+</sup>), 285.2213. Found, 285.2211.

(*E*)-2-benzyl-3-cyclohexyl-1-phenylprop-2-en-1-one (**4h**)

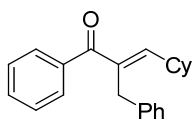

Isolated by MPLC (hexane/EtOAc = 98/2). Pale yellow oil. 44.3 mg, 73% yield. **<sup>1</sup>H NMR (400 MHz, CDCl<sub>3</sub>)** δ: 7.63-7.59 (m, 2H), 7.49-7.45 (m, 1H), 7.40-7.35 (m, 2H), 7.27-7.22 (m, 4H), 7.18-7.12 (m, 1H), 6.16 (d, *J* = 10.0 Hz, 1H), 3.87 (s, 2H), 2.59 (tdt, *J* = 10.9, 10.4, 3.6 Hz, 1H), 1.76-1.61 (m, 5H), 1.36-1.04 (m, 5H). **<sup>13</sup>C NMR (100 MHz, CDCl<sub>3</sub>)** δ: 198.51, 151.67, 139.98, 138.71, 137.53, 131.50, 129.44, 128.37, 128.33, 127.99, 125.89, 38.44, 32.48, 32.05, 25.71, 25.40. **IR (ATR):** 711.7, 785.0, 960.6, 1028.1, 1070.5, 1176.6, 1226.7, 1276.9, 1315.5, 1446.6, 1494.8, 1597.1, 1649.1, 2850.8, 2924.1 cm<sup>-1</sup>. **Anal.** Calcd. for C<sub>22</sub>H<sub>24</sub>O: C, 86.80; H, 7.95. Found: C, 86.95; H, 8.19. **EIMS:** *m/z* 305 (23%, [M+1]<sup>+</sup>), 304 (100, [M]<sup>+</sup>), 221 (55), 105 (81), 91 (43), 77 (42).

(*E*)-2-benzyl-3-cyclohexyl-1-(4-methoxyphenyl)prop-2-en-1-one (**4i**)

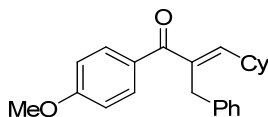

Isolated by MPLC (hexane/EtOAc = 98/2). Pale yellow oil. 44.1 mg, 66% yield. **<sup>1</sup>H NMR (400 MHz, CDCl<sub>3</sub>)** δ: 7.66 (dt, *J* = 9.4, 2.5 Hz, 2H), 7.25-7.21 (m, 4H), 7.17-7.11 (m, 1H), 6.88 (dt, *J* = 9.4, 2.4 Hz, 2H), 6.08 (d, *J* = 10.0 Hz, 1H), 3.86 (s, 2H), 3.83 (s, 3H), 2.58 (tdt, *J* = 10.9, 10.4, 3.5 Hz, 1H), 1.75-1.64 (m, 5H), 1.36-1.08 (m, 5H). **<sup>13</sup>C NMR (100 MHz, CDCl<sub>3</sub>)** δ: 197.41, 162.59, 149.48, 140.04, 137.41, 131.86, 131.10, 128.38, 125.87, 113.29, 55.37, 38.29, 32.93, 32.22, 25.77, 25.48. (One aromatic carbon peak was overlapped.) **IR (ATR):** 761.9, 842.9, 1030.0, 1168.9, 1228.7, 1253.7, 1448.5, 1508.3, 1599.0, 1641.4, 2924.1 cm<sup>-1</sup>. **HRMS (APCI):** Calcd. for C<sub>23</sub>H<sub>27</sub>O<sub>2</sub> ([M+H]<sup>+</sup>), 335.2006. Found, 335.1998.

(*E*)-2-benzyl-1-(4-chlorophenyl)-3-cyclohexylprop-2-en-1-one (**4j**)

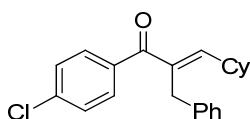

Isolated by MPLC (hexane/EtOAc = 98/2). White solid. 49.1 mg, 72% yield. **M.p.** 80-81 °C **<sup>1</sup>H NMR (400 MHz, CDCl<sub>3</sub>)**  $\delta$ : 7.55 (dt,  $J$  = 8.8, 2.3 Hz, 2H), 7.36 (dt,  $J$  = 8.9, 2.0 Hz, 2H), 7.27-7.20 (m, 4H), 7.17-7.12 (m, 1H), 6.12 (d,  $J$  = 9.5 Hz, 1H), 3.85 (s, 2H), 2.59 (tdt,  $J$  = 11.3, 10.0, 3.9 Hz, 1H), 1.76-1.62 (m, 5H), 1.36-1.05 (m, 5H). **<sup>13</sup>C NMR (100 MHz, CDCl<sub>3</sub>)**  $\delta$ : 197.25, 151.60, 139.76, 137.85, 137.47, 136.97, 130.82, 128.43, 128.32, 128.29, 125.99, 38.43, 32.53, 32.06, 25.69, 25.37. **IR (ATR)**: 740.7, 754.2, 825.5, 947.1, 1014.6, 1226.7, 1275.0, 1302.0, 1446.6, 1494.8, 1589.3, 1645.3, 2846.9, 2924.1 cm<sup>-1</sup>. **Anal.** Calcd. for C<sub>22</sub>H<sub>23</sub>OCl: C, 77.98; H, 6.84. Found: C, 77.76; H, 6.97. **EIMS**:  $m/z$  340 (34%, [M+2]<sup>+</sup>), 339 (26, [M+1]<sup>+</sup>), 338 (100, [M]<sup>+</sup>), 255 (48), 139 (79), 111 (39), 91 (62).

(*E*)-4-benzyl-1,7-diphenylhept-4-en-3-one (**4k**)

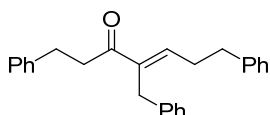

Isolated by MPLC (hexane/EtOAc = 98/2). Pale yellow oil. 42.5 mg, 60% yield. **<sup>1</sup>H NMR (400 MHz, CDCl<sub>3</sub>)**  $\delta$ : 7.29-7.11 (m, 13H), 7.07-7.04 (m, 2H), 6.75 (t,  $J$  = 7.2 Hz, 1H), 3.64 (s, 2H), 2.96-2.91 (m, 2H), 2.89-2.85 (m, 2H), 2.71 (t,  $J$  = 7.7 Hz, 2H), 2.64-2.58 (m, 2H). **<sup>13</sup>C NMR (100 MHz, CDCl<sub>3</sub>)**  $\delta$ : 200.17, 142.83, 141.36, 140.76, 140.72, 139.75, 128.50, 128.40, 128.34, 128.32, 128.29, 128.21, 126.23, 125.97, 125.83, 39.27, 34.74, 31.24, 31.10, 30.65. **IR (ATR)**: 939.3, 1030.0, 1452.4, 1494.8, 1602.9, 1678.1, 2927.9, 3026.3 cm<sup>-1</sup>. **HRMS (APCI)**: Calcd. for C<sub>26</sub>H<sub>27</sub>O ([M+H]<sup>+</sup>), 355.2056. Found, 355.2046.

(*E*)-4-benzyl-6-methyl-1-phenylundec-4-en-3-one (**4l**)

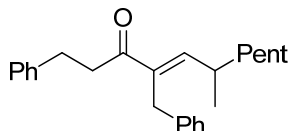

Isolated by MPLC (hexane/EtOAc = 98/2). Colorless oil. 55.0 mg, 79% yield. **<sup>1</sup>H NMR (400 MHz, CDCl<sub>3</sub>)**  $\delta$ : 7.29-7.09 (m, 10H), 6.47 (d,  $J$  = 10.4 Hz, 1H), 3.68 (s, 2H), 3.00-2.95 (m, 2H), 2.92-2.86 (m, 2H), 2.68-2.57 (m, 1H), 1.37-1.14 (m, 8H), 0.96 (d,  $J$  = 6.8 Hz, 3H), 0.85 (t,  $J$  = 6.8 Hz, 3H). **<sup>13</sup>C NMR (100 MHz, CDCl<sub>3</sub>)**  $\delta$ : 200.59, 150.05, 141.49, 140.21, 138.67, 128.41, 128.37, 128.25, 128.20, 125.97, 125.74, 39.38, 36.82, 33.78, 31.85, 31.39, 30.70, 27.09, 22.51, 20.02, 13.99. **IR (ATR)**: 734.9, 1030.0, 1076.3, 1124.5, 1452.4, 1494.8, 1602.9, 1668.4, 2926.0, 2956.9 cm<sup>-1</sup>. **Anal.** Calcd. for C<sub>25</sub>H<sub>32</sub>O: C, 86.15; H, 9.25. Found: C, 86.08; H, 9.44. **EIMS**:  $m/z$  348 (11%, [M]<sup>+</sup>), 250 (20), 149 (100), 105 (18), 91 (55).

(*E*)-4-benzyl-6,6-dimethyl-1-phenyloct-4-en-3-one (**4m**)

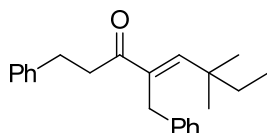

Isolated by MPLC (hexane/EtOAc = 98/2). Colorless oil. 57.6 mg, 90% yield. **<sup>1</sup>H NMR (400 MHz, CDCl<sub>3</sub>)**  $\delta$ : 7.27-7.11 (m, 8H), 7.07 (d,  $J$  = 7.2 Hz, 2H), 6.67 (s, 1H), 3.86 (s, 2H), 2.97-2.93 (m, 2H), 2.88-2.83 (m, 2H), 1.47 (q,  $J$  = 7.4 Hz, 2H), 1.13 (s, 6H), 0.84 (t,  $J$  = 7.5 Hz, 3H). **<sup>13</sup>C NMR (100 MHz, CDCl<sub>3</sub>)**  $\delta$ : 201.72, 151.76, 141.47, 139.97,

139.00, 128.38, 128.35, 128.23, 127.89, 125.94, 125.65, 39.82, 37.13, 36.61, 31.62, 30.72, 27.66, 9.22. **IR (ATR):** 729.1, 748.4, 987.6, 1030.0, 1076.3, 1155.4, 1452.4, 1494.8, 1602.9, 1672.3, 2962.7  $\text{cm}^{-1}$ . **Anal.** Calcd. for  $\text{C}_{23}\text{H}_{28}\text{O}$ : C, 86.20; H, 8.81. Found: C, 86.41; H, 8.69. **EIMS:**  $m/z$  320 (10,  $[\text{M}]^+$ ), 250 (23), 249 (100), 105 (31), 91 (81).

(*E*)-2-benzyl-1,5-diphenylpent-1-en-3-one (**4n**)

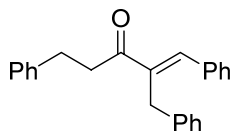

Isolated by MPLC (hexane/EtOAc = 98/2). Pale yellow oil. 25.1 mg, 38% yield.  **$^1\text{H NMR}$  (400 MHz,  $\text{CDCl}_3$ )**  $\delta$ : 7.71 (s, 1H), 7.35-7.23 (m, 9H), 7.22-7.16 (m, 4H), 7.12 (d,  $J = 7.2$  Hz, 2H), 3.95 (s, 2H), 3.12 (t,  $J = 7.5$  Hz, 2H), 2.96 (t,  $J = 7.7$  Hz, 2H).  **$^{13}\text{C NMR}$  (100 MHz,  $\text{CDCl}_3$ )**  $\delta$ : 200.82, 141.35, 140.35, 139.48, 139.42, 135.30, 129.18, 128.87, 128.59, 128.54, 128.46, 128.41, 127.93, 126.03, 39.82, 32.35, 30.54. (One aromatic carbon peak was overlapped.) **IR (ATR):** 750.3, 993.3, 1030.0, 1076.3, 1159.2, 1211.3, 1452.4, 1494.8, 1602.9, 1668.4, 3026.3  $\text{cm}^{-1}$ . **Anal.** Calcd. for  $\text{C}_{24}\text{H}_{22}\text{O}$ : C, 88.31; H, 6.79. Found: C, 88.45; H, 6.96. **EIMS:**  $m/z$  327 (21%,  $[\text{M}+1]^+$ ), 326 (81,  $[\text{M}]^+$ ), 235 (41), 221 (50), 115 (71), 91 (100).

4-benzyl-5-butyl-1-phenylnon-4-en-3-one (**4o**)

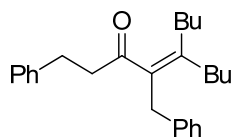

Isolated by MPLC (hexane/EtOAc = 97/3). Colorless oil. 58.8 mg, 81% yield.  **$^1\text{H NMR}$  (400 MHz,  $\text{CDCl}_3$ )**  $\delta$ : 7.28-7.11 (m, 8H), 7.05-7.02 (m, 2H), 3.63 (s, 2H), 2.75-2.66 (m, 2H), 2.63-2.57 (m, 2H), 2.15-2.06 (m, 4H), 1.46-1.23 (m, 8H), 0.89 (t,  $J = 7.2$  Hz, 6H).  **$^{13}\text{C NMR}$  (100 MHz,  $\text{CDCl}_3$ )**  $\delta$ : 207.33, 145.24, 141.28, 139.02, 135.23, 128.51, 128.30, 126.21, 125.84, 44.70, 35.06, 33.35, 31.87, 31.31, 30.60, 29.78, 23.01, 22.97, 13.95, 13.93. (2 aromatic carbon peaks were overlapped.) **IR (ATR):** 1030.0, 1074.4, 1138.0, 1454.3, 1494.8, 1602.9, 1687.7, 2929.9, 2956.9  $\text{cm}^{-1}$ . **HRMS (APCI):** Calcd. for  $\text{C}_{26}\text{H}_{35}\text{O}$  ( $[\text{M}+\text{H}]^+$ ), 363.2682. Found, 363.2674.

3-phenyl-1-[(*E*)-9-phenylcyclonon-1-en-1-yl]propan-1-one (**4p**)

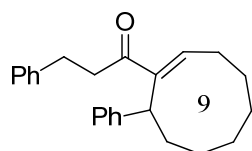

Isolated by MPLC (hexane/EtOAc = 98/2). Colorless oil. 60.4 mg, 91% yield.  **$^1\text{H NMR}$  (400 MHz,  $\text{CDCl}_3$ )**  $\delta$ : 7.27-7.20 (m, 6H), 7.17-7.08 (m, 4H), 6.84 (dd,  $J = 10.0, 8.2$  Hz, 1H), 4.33 (dd,  $J = 12.2, 5.0$  Hz, 1H), 2.98-2.78 (m, 4H), 2.71-2.62 (m, 1H), 2.47-2.33 (m, 2H), 1.98-1.90 (m, 1H), 1.75-1.42 (m, 8H).  **$^{13}\text{C NMR}$  (100 MHz,  $\text{CDCl}_3$ )**  $\delta$ : 200.94, 144.24, 144.05, 143.32, 141.46, 128.33, 128.26, 128.09, 127.28, 125.87, 125.62, 42.11, 40.13, 31.46, 30.62, 28.45, 27.23, 26.42, 26.38, 25.82. **IR (ATR):** 750.3, 1138.0, 1452.4, 1494.8, 1600.9, 1668.4, 2924.1, 3026.3  $\text{cm}^{-1}$ . **Anal.**

Calcd. for C<sub>24</sub>H<sub>28</sub>O: C, 86.70; H, 8.49. Found: C, 86.73; H, 8.71. **EIMS**: *m/z* 332 (24%, [M]<sup>+</sup>), 228 (27), 227 (88), 105 (56), 91 (100).

(*E*)-1-cyclohexyl-2-[(4-methoxyphenyl)methyl]-5-phenylpent-1-en-3-one (**4q**)

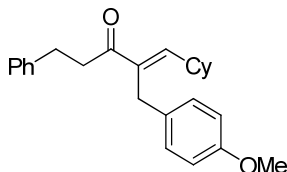

Isolated by MPLC (hexane/EtOAc = 97/3). Colorless oil. 59.1 mg, 82% yield. **<sup>1</sup>H NMR (400 MHz, CDCl<sub>3</sub>)**  $\delta$ : 7.28-7.23 (m, 2H), 7.20-7.13 (m, 3H), 7.04 (dt, *J* = 8.6, 2.5 Hz, 2H), 6.78 (dt, *J* = 9.4, 2.5 Hz, 2H), 6.49 (d, *J* = 9.5 Hz, 1H), 3.76 (s, 3H), 3.62 (s, 2H), 2.97-2.92 (m, 2H), 2.90-2.85 (m, 2H), 2.49 (tdt, *J* = 10.9, 10.0, 3.6 Hz, 1H), 1.76-1.57 (m, 5H), 1.33-1.06 (m, 5H). **<sup>13</sup>C NMR (100 MHz, CDCl<sub>3</sub>)**  $\delta$ : 200.77, 157.69, 148.55, 141.54, 138.47, 132.26, 129.11, 128.39, 128.37, 125.95, 113.71, 55.19, 39.40, 38.30, 32.08, 30.63, 30.54, 25.75, 25.43. **IR (ATR)**: 750.3, 817.8, 1035.8, 1126.4, 1176.6, 1246.0, 1300.0, 1448.5, 1510.3, 1610.6, 1668.4, 2850.8, 2926.0 cm<sup>-1</sup>. **Anal.** Calcd. for C<sub>25</sub>H<sub>30</sub>O<sub>2</sub>: C, 82.83; H, 8.34. Found: C, 82.73; H, 8.43. **EIMS**: *m/z* 362 (47%, [M]<sup>+</sup>), 279 (87), 257 (32), 163 (32), 121 (100), 108 (35), 91 (54).

(*E*)-1-cyclohexyl-2-[(4-fluorophenyl)methyl]-5-phenylpent-1-en-3-one (**4r**)

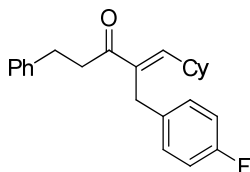

Isolated by MPLC (hexane/EtOAc = 97/3). Colorless oil. 60.7 mg, 87% yield. **<sup>1</sup>H NMR (400 MHz, CDCl<sub>3</sub>)**  $\delta$ : 7.26 (t, *J* = 7.2 Hz, 2H), 7.20-7.14 (m, 3H), 7.07 (dd, *J* = 8.8, 5.7 Hz, 2H), 6.90 (tt, *J* = 8.8, 2.3 Hz, 2H), 6.51 (d, *J* = 10.0 Hz, 1H), 3.64 (s, 2H), 2.98-2.94 (m, 2H), 2.91-2.86 (m, 2H), 2.45 (tdt, *J* = 10.9, 10.4, 3.6 Hz, 1H), 1.76-1.54 (m, 5H), 1.32-1.06 (m, 5H). **<sup>13</sup>C NMR (100 MHz, CDCl<sub>3</sub>)**  $\delta$ : 200.60, 161.14 (d, *J* = 244.1 Hz), 149.05, 141.41, 138.14, 135.88 (d, *J* = 3.8 Hz), 129.51 (d, *J* = 7.6 Hz), 128.40, 128.35, 125.97, 114.97 (d, *J* = 21.0 Hz), 39.22, 38.39, 31.99, 30.61, 30.58, 25.68, 25.37. **IR (ATR)**: 750.3, 821.7, 902.7, 1016.5, 1093.6, 1126.4, 1157.3, 1220.9, 1448.5, 1506.4, 1602.9, 1668.4, 2850.8, 2926.0 cm<sup>-1</sup>. **HRMS (APCI)**: Calcd. for C<sub>24</sub>H<sub>28</sub>FO ([M+H]<sup>+</sup>), 351.2119. Found, 351.2106.

(*E*)-2-[(4-chlorophenyl)methyl]-1-cyclohexyl-5-phenylpent-1-en-3-one (**4s**)

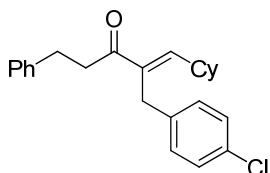

Isolated by MPLC (hexane/EtOAc = 98/2). Colorless oil. 66.0 mg, 90% yield. **<sup>1</sup>H NMR (400 MHz, CDCl<sub>3</sub>)**  $\delta$ : 7.29-7.22 (m, 2H), 7.22-7.13 (m, 5H), 7.04 (dt, *J* = 8.8, 2.3 Hz, 2H), 6.52 (d, *J* = 10.0 Hz, 1H), 3.63 (s, 2H), 2.99-2.93 (m, 2H), 2.91-2.86 (m, 2H), 2.44 (tdt, *J* = 10.9, 10.0, 4.1 Hz, 1H), 1.77-1.54 (m, 5H), 1.33-1.06 (m, 5H). **<sup>13</sup>C NMR (100**

**MHz, CDCl<sub>3</sub>**)  $\delta$ : 200.55, 149.28, 141.39, 138.76, 137.87, 131.48, 129.52, 128.42, 128.37, 126.01, 39.21, 38.44, 32.01, 30.79, 30.63, 25.69, 25.38. (One aromatic carbon peak was overlapped.) **IR (ATR)**: 750.3, 902.7, 1014.6, 1091.7, 1126.4, 1178.5, 1448.5, 1491.0, 1668.4, 2850.8, 2926.0 cm<sup>-1</sup>. **Anal.** Calcd. for C<sub>24</sub>H<sub>27</sub>OCl: C, 78.56; H, 7.42. Found: C, 78.48; H, 7.49. **EIMS**:  $m/z$  366 (11%, [M]<sup>+</sup>), 285 (33), 284 (21), 283 (100), 125 (30), 91 (41).

(*E*)-2-[(4-bromophenyl)methyl]-1-cyclohexyl-5-phenylpent-1-en-3-one (**4t**)

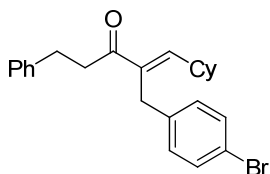

Isolated by preparative recycling GPC. Colorless oil. 69.3 mg, 84% yield. **<sup>1</sup>H NMR (400 MHz, CDCl<sub>3</sub>)**  $\delta$ : 7.33 (dt,  $J$  = 9.1, 2.2 Hz, 2H), 7.28-7.24 (m, 2H), 7.20-7.14 (m, 3H), 6.98 (d,  $J$  = 8.2 Hz, 2H), 6.52 (d,  $J$  = 10.0 Hz, 1H), 3.61 (s, 2H), 2.98-2.94 (m, 2H), 2.90-2.86 (m, 2H), 2.43 (tdt,  $J$  = 10.9, 10.0, 3.6 Hz, 1H), 1.76-1.54 (m, 5H), 1.32-1.06 (m, 5H). **<sup>13</sup>C NMR (100 MHz, CDCl<sub>3</sub>)**  $\delta$ : 200.49, 149.30, 141.35, 139.27, 137.76, 131.28, 129.92, 128.40, 128.35, 125.99, 119.52, 39.18, 38.42, 31.98, 30.83, 30.60, 25.66, 25.35. **IR (ATR)**: 750.3, 794.7, 902.7, 1010.7, 1072.4, 1126.4, 1178.5, 1406.1, 1448.5, 1487.1, 1666.5, 2850.8, 2926.0 cm<sup>-1</sup>. **HRMS (APCI)**: Calcd. for C<sub>24</sub>H<sub>28</sub>BrO ([M+H]<sup>+</sup>), 411.1318. Found, 411.1305.

4-[(*E*)-2-(cyclohexylmethylidene)-3-oxo-5-phenylpentyl]benzonitrile (**4u**)

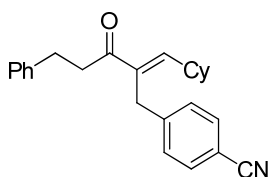

Isolated by preparative recycling GPC. Pale yellow oil. 52.0 mg, 73% yield. **<sup>1</sup>H NMR (400 MHz, CDCl<sub>3</sub>)**  $\delta$ : 7.51 (d,  $J$  = 8.2 Hz, 2H), 7.27-7.25 (m, 2H), 7.20-7.14 (m, 5H), 6.58 (d,  $J$  = 10.0 Hz, 1H), 3.71 (s, 2H), 3.01-2.96 (m, 2H), 2.91-2.88 (m, 2H), 2.40 (tdt,  $J$  = 10.9, 10.3, 3.4 Hz, 1H), 1.77-1.53 (m, 5H), 1.31-1.08 (m, 5H). **<sup>13</sup>C NMR (100 MHz, CDCl<sub>3</sub>)**  $\delta$ : 200.30, 150.08, 146.07, 141.17, 137.07, 132.07, 128.90, 128.40, 128.33, 126.04, 119.03, 109.59, 38.96, 38.57, 31.90, 31.62, 30.56, 25.57, 25.28. **IR (ATR)**: 750.3, 819.8, 1126.4, 1176.6, 1448.5, 1496.8, 1606.7, 1666.5, 2225.9, 2850.8, 2926.0 cm<sup>-1</sup>. **HRMS (APCI)**: Calcd. for C<sub>25</sub>H<sub>28</sub>NO ([M+H]<sup>+</sup>), 358.2165. Found, 358.2159.

methyl 4-[(*E*)-2-(cyclohexylmethylidene)-3-oxo-5-phenylpentyl]benzoate (**4v**)

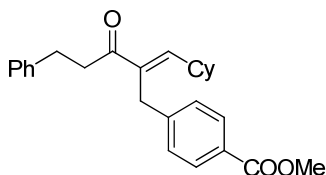

Isolated by MPLC (hexane/EtOAc = 95/5). Pale yellow oil. 61.9 mg, 79% yield. **<sup>1</sup>H NMR (400 MHz, CDCl<sub>3</sub>)**  $\delta$ : 7.91 (dt,  $J$  = 8.5, 2.0 Hz, 2H), 7.28-7.24 (m, 2H), 7.20-7.15 (m, 5H), 6.55 (d,  $J$  = 10.0 Hz, 1H), 3.88 (s, 3H), 3.72 (s, 2H), 2.99-2.97 (m, 2H), 2.91-2.87 (m, 2H), 2.43 (tdt,  $J$  = 10.9, 10.0, 3.9 Hz, 1H), 1.74-1.54 (m, 5H), 1.30-1.06 (m,

5H).  $^{13}\text{C}$  NMR (100 MHz,  $\text{CDCl}_3$ )  $\delta$ : 200.42, 167.04, 149.62, 145.90, 141.33, 137.53, 129.62, 128.40, 128.34, 128.13, 127.73, 125.99, 51.90, 39.14, 38.49, 31.91, 31.46, 30.62, 25.64, 25.32. IR (ATR): 752.2, 902.7, 1020.3, 1107.1, 1178.5, 1278.8, 1435.0, 1496.8, 1608.6, 1668.4, 1720.5, 2850.8, 2926.0  $\text{cm}^{-1}$ . HRMS (APCI): Calcd. for  $\text{C}_{26}\text{H}_{31}\text{O}_3$  ( $[\text{M}+\text{H}]^+$ ), 391.2268. Found, 391.2254.

(*E*)-1-cyclohexyl-2-(naphthalen-1-ylmethyl)-5-phenylpent-1-en-3-one (**4w**)

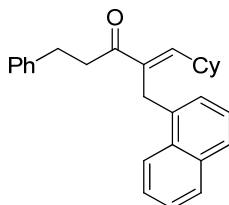

Isolated by preparative recycling GPC. Pale yellow oil. 68.1 mg, 89% yield.  $^1\text{H}$  NMR (400 MHz,  $\text{CDCl}_3$ )  $\delta$ : 8.13 (d,  $J = 8.6$  Hz, 1H), 7.86-7.83 (m, 1H), 7.68 (d,  $J = 8.2$  Hz, 1H), 7.56-7.46 (m, 2H), 7.32-7.24 (m, 3H), 7.22-7.15 (m, 3H), 6.98 (dd,  $J = 7.2, 0.9$  Hz, 1H), 6.71 (d,  $J = 10.0$  Hz, 1H), 4.13 (s, 2H), 3.07-3.02 (m, 2H), 2.94-2.89 (m, 2H), 2.36-2.26 (m, 1H), 1.68-1.54 (m, 5H), 1.26-1.07 (m, 5H).  $^{13}\text{C}$  NMR (100 MHz,  $\text{CDCl}_3$ )  $\delta$ : 200.70, 150.07, 141.53, 137.19, 135.56, 133.73, 132.03, 128.69, 128.45, 126.61, 126.01, 125.84, 125.51, 125.44, 123.95, 123.50, 39.41, 38.22, 32.00, 30.72, 28.05, 25.71, 25.28. (One aromatic carbon peak was overlapped.) IR (ATR): 750.3, 771.5, 790.8, 902.7, 1076.3, 1126.4, 1398.4, 1448.5, 1494.8, 1668.4, 2850.8, 2924.1  $\text{cm}^{-1}$ . HRMS (APCI): Calcd. for  $\text{C}_{28}\text{H}_{31}\text{O}$  ( $[\text{M}+\text{H}]^+$ ), 383.2369. Found, 383.2361.

(4*E*,6*E*)-4-(cyclohexylmethylidene)-1,7-diphenylhept-6-en-3-one (**4x**)

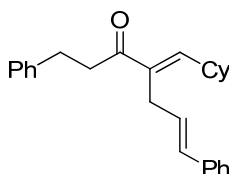

Isolated by MPLC (hexane/EtOAc = 98/2). Colorless oil. 44.2 mg, 62% yield.  $^1\text{H}$  NMR (400 MHz,  $\text{CDCl}_3$ )  $\delta$ : 7.31-7.24 (m, 6H), 7.21-7.15 (m, 4H), 6.48 (d,  $J = 10.0$  Hz, 1H), 6.34 (d,  $J = 15.9$  Hz, 1H), 6.14 (dt,  $J = 15.9, 6.3$  Hz, 1H), 3.22 (dd,  $J = 6.6, 1.1$  Hz, 2H), 3.01-2.97 (m, 2H), 2.95-2.90 (m, 2H), 2.45 (tdt,  $J = 10.8, 10.0, 3.6$  Hz, 1H), 1.77-1.63 (m, 5H), 1.36-1.07 (m, 5H).  $^{13}\text{C}$  NMR (100 MHz,  $\text{CDCl}_3$ )  $\delta$ : 200.41, 148.98, 141.53, 137.58, 137.15, 130.18, 128.42, 128.40, 128.30, 126.90, 125.98, 39.21, 38.15, 32.14, 30.73, 29.20, 25.75, 25.44. (2 aromatic carbon peaks were overlapped.) IR (ATR): 900.8, 964.4, 1030.0, 1074.4, 1126.4, 1178.5, 1448.5, 1494.8, 1668.4, 2850.8, 2924.1, 3026.3  $\text{cm}^{-1}$ . Anal. Calcd. for  $\text{C}_{26}\text{H}_{30}\text{O}$ : C, 87.10; H, 8.43. Found: C, 86.79; H, 8.48. EIMS:  $m/z$  359 (18%,  $[\text{M}+1]^+$ ), 358 (46,  $[\text{M}]^+$ ), 275 (81), 207 (27), 105 (64), 91(100).

## 5. NMR Charts

$^1\text{H}$  NMR spectrum of **2d**

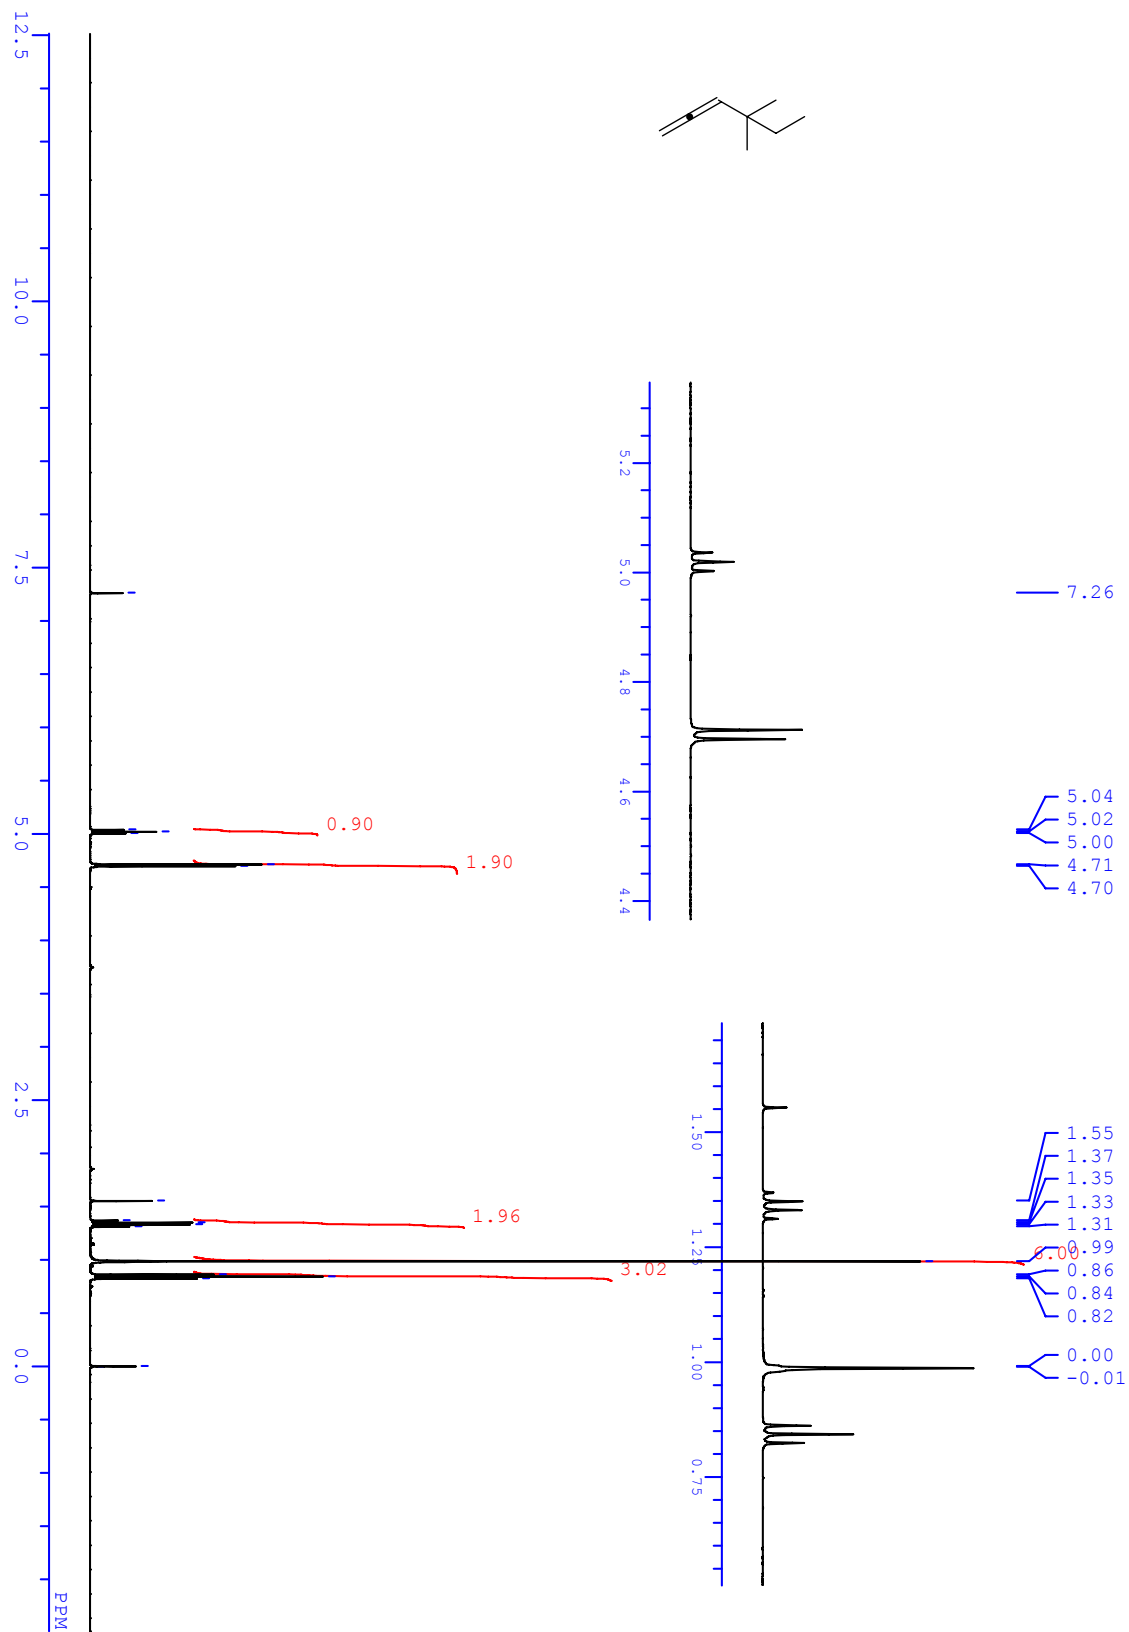

$^{13}\text{C}$   $\{^1\text{H}\}$  NMR spectrum of **2d**

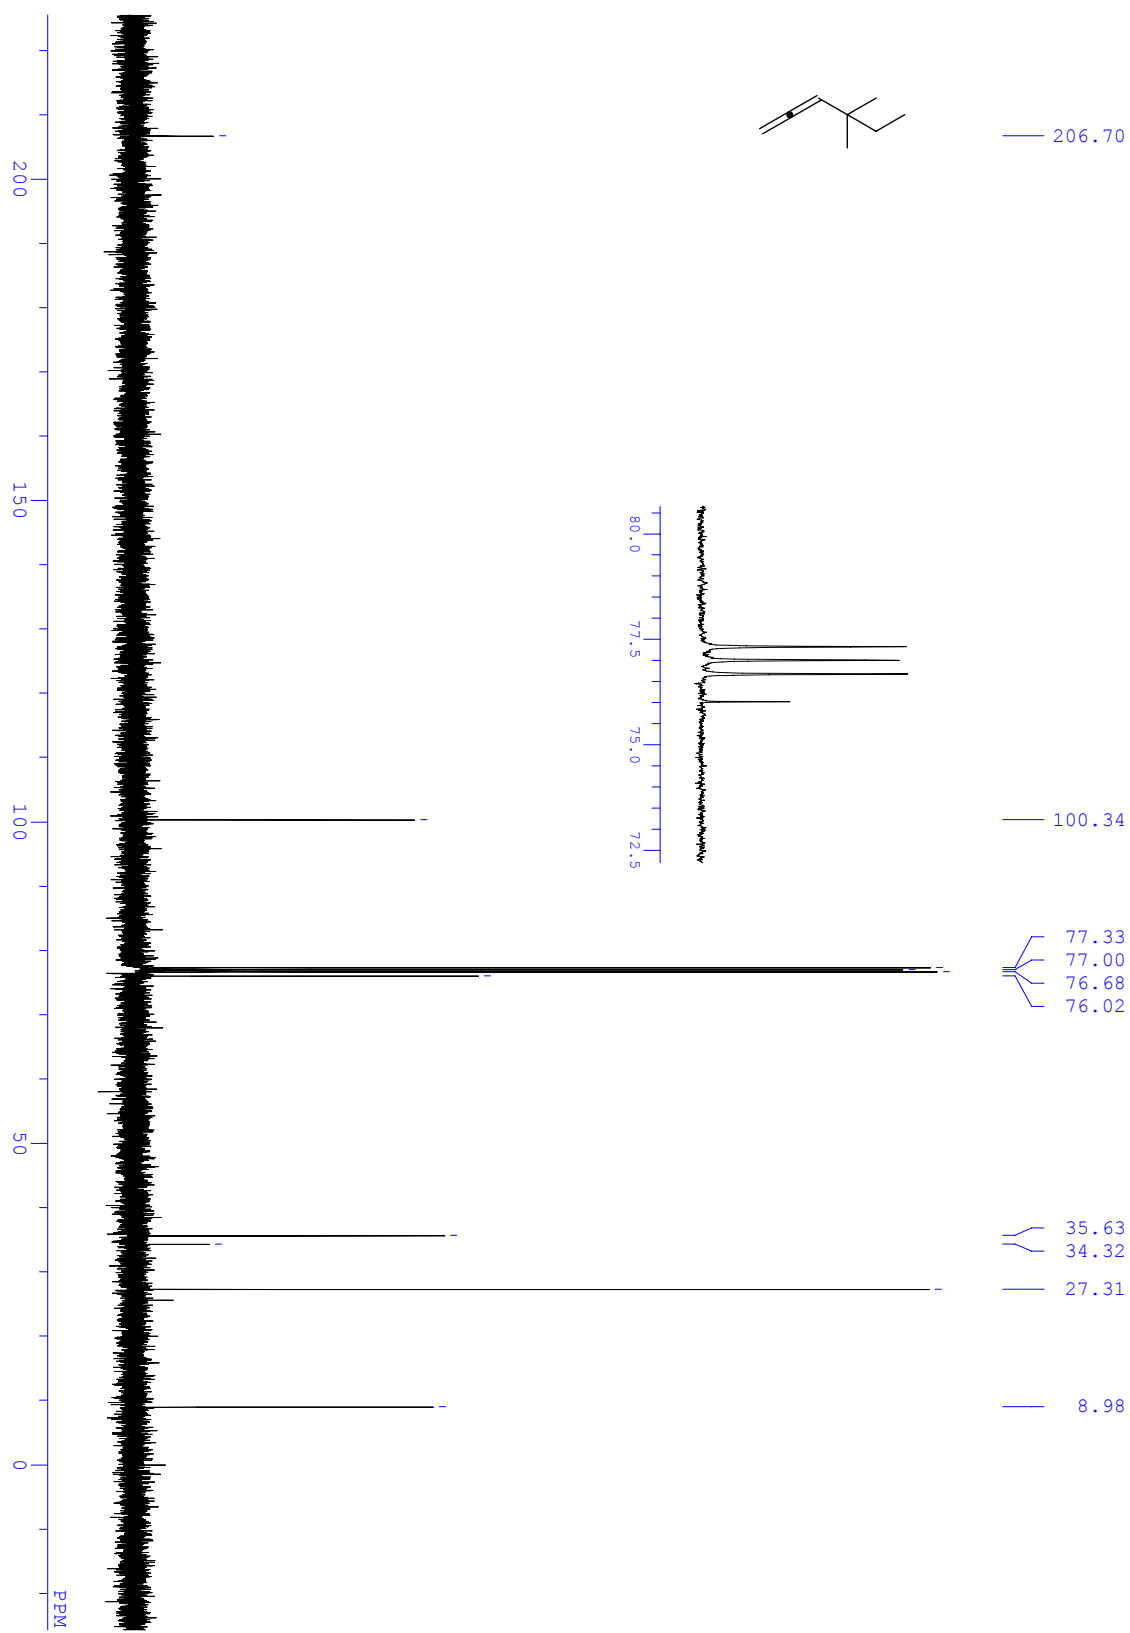



<sup>1</sup>H NMR spectrum of 4a

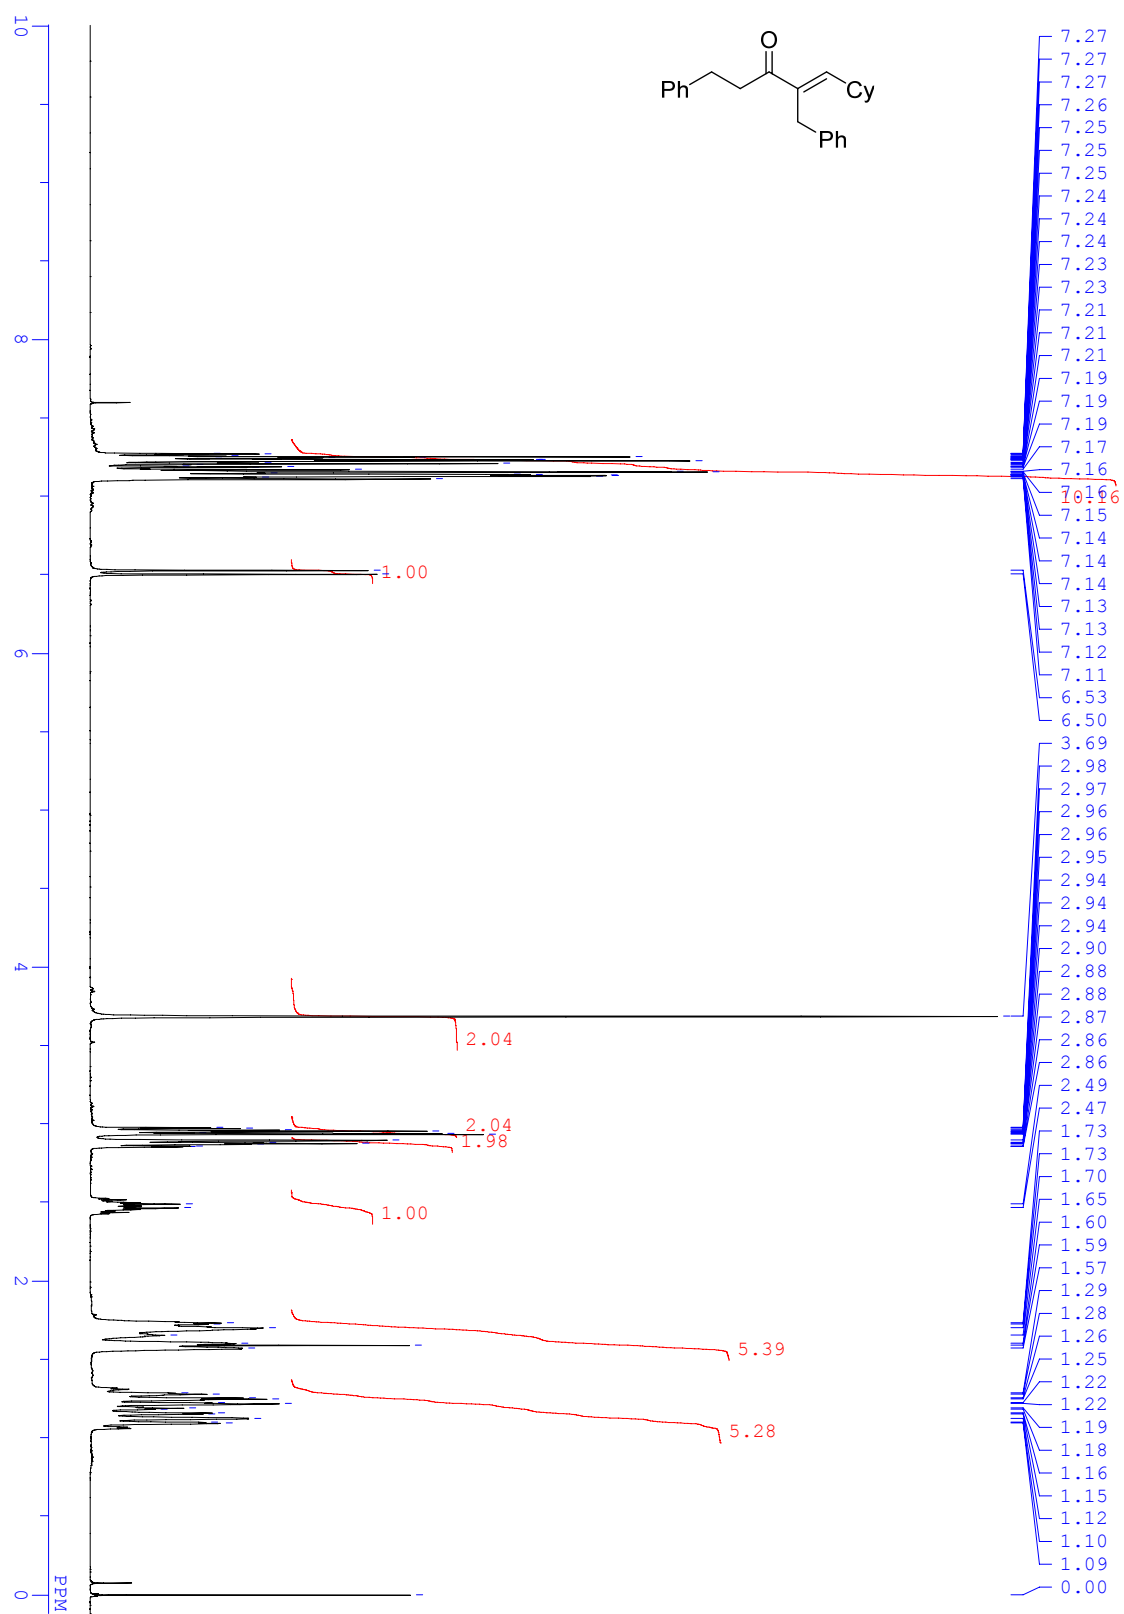

$^{13}\text{C}$   $\{^1\text{H}\}$  NMR spectrum of **4a**

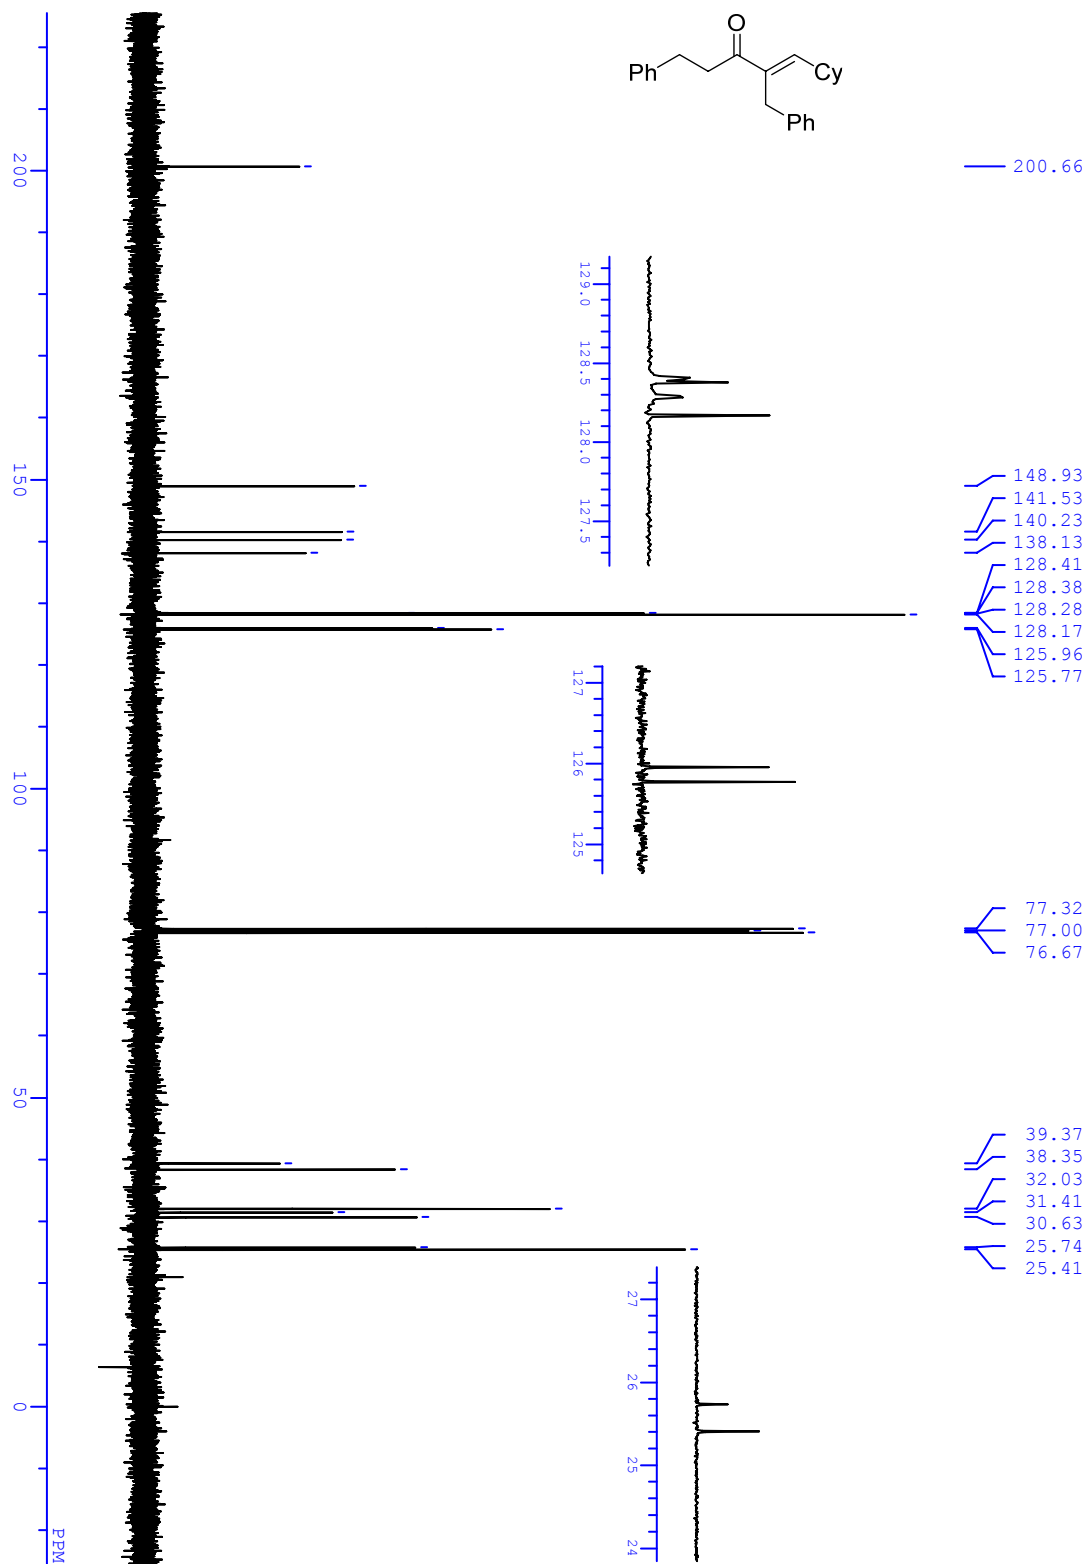

<sup>1</sup>H NMR spectrum of 4c

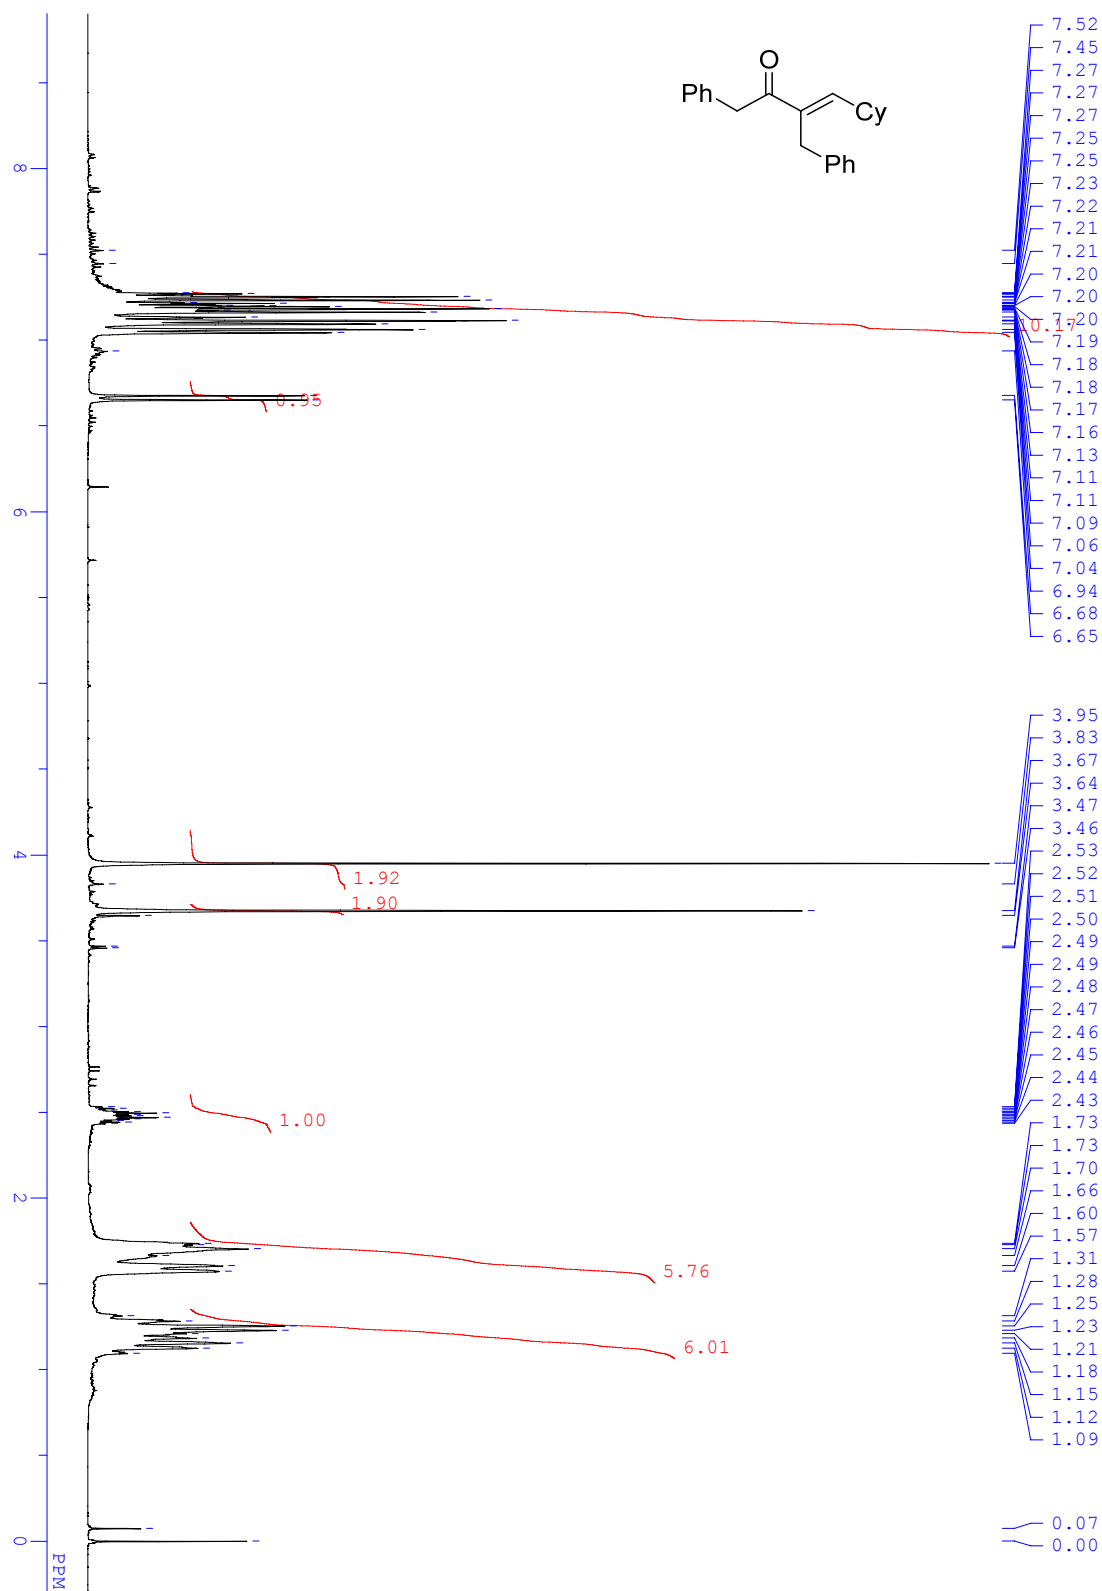

$^{13}\text{C}$   $\{^1\text{H}\}$  NMR spectrum of **4c**

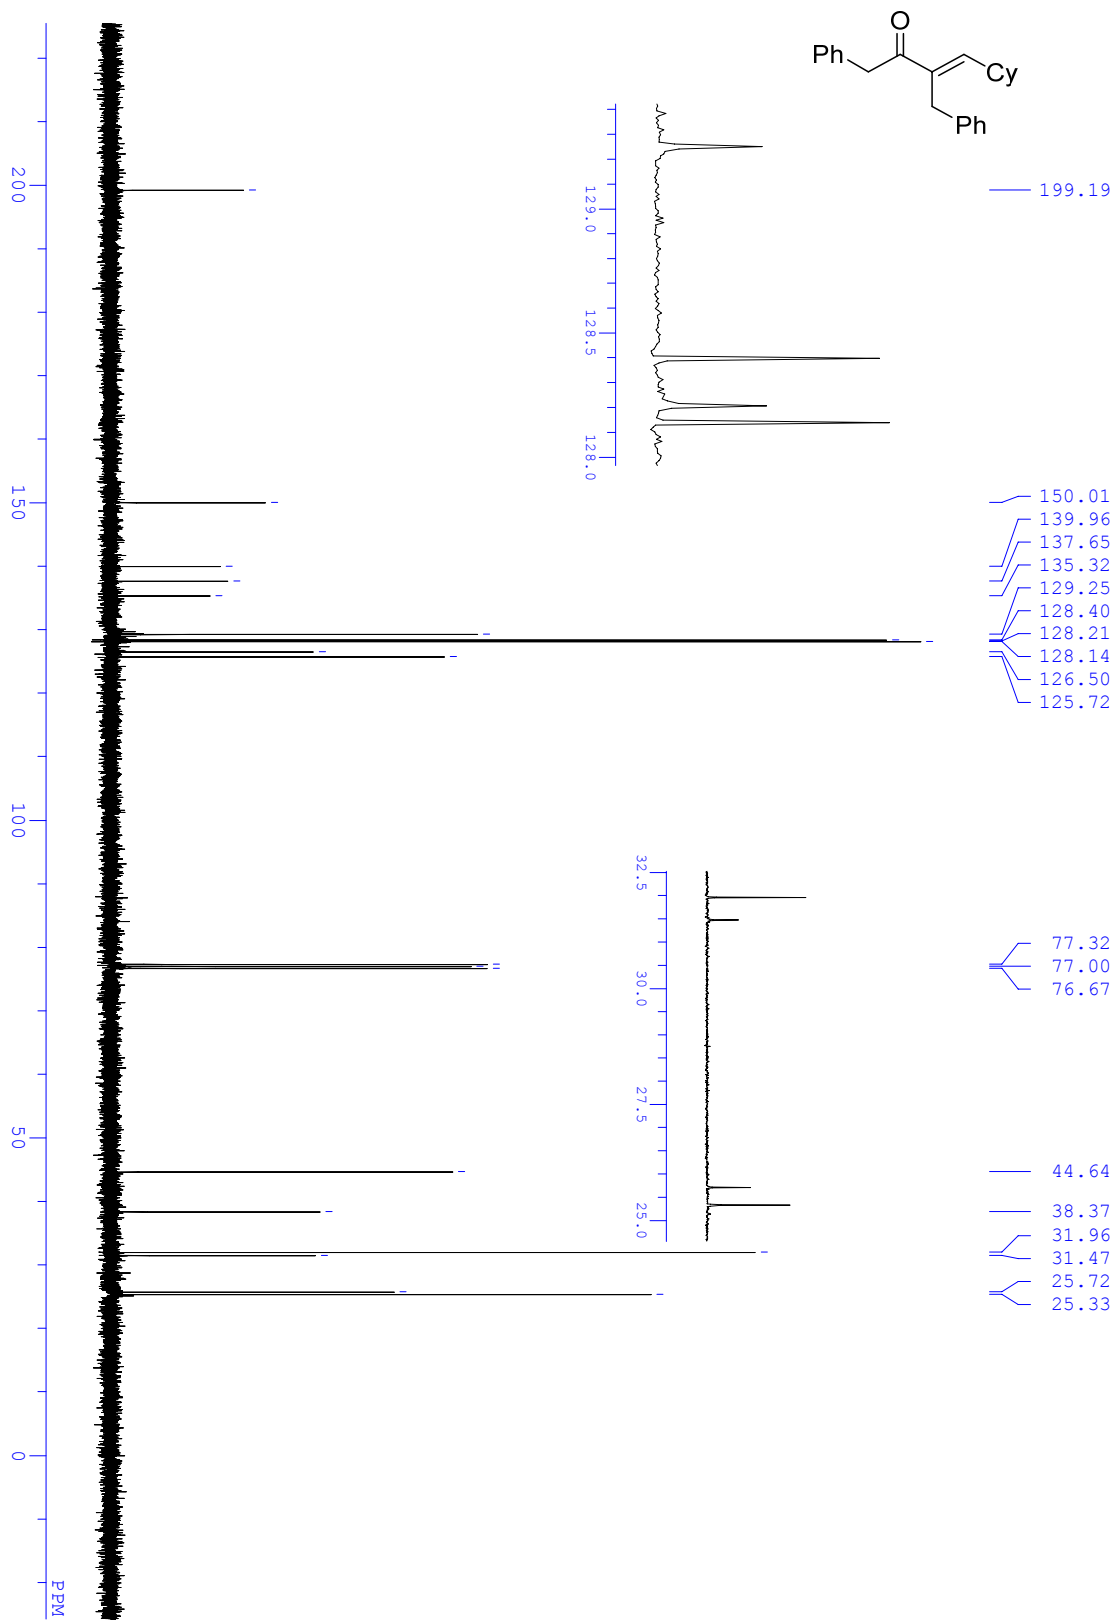

<sup>1</sup>H NMR spectrum of 4e

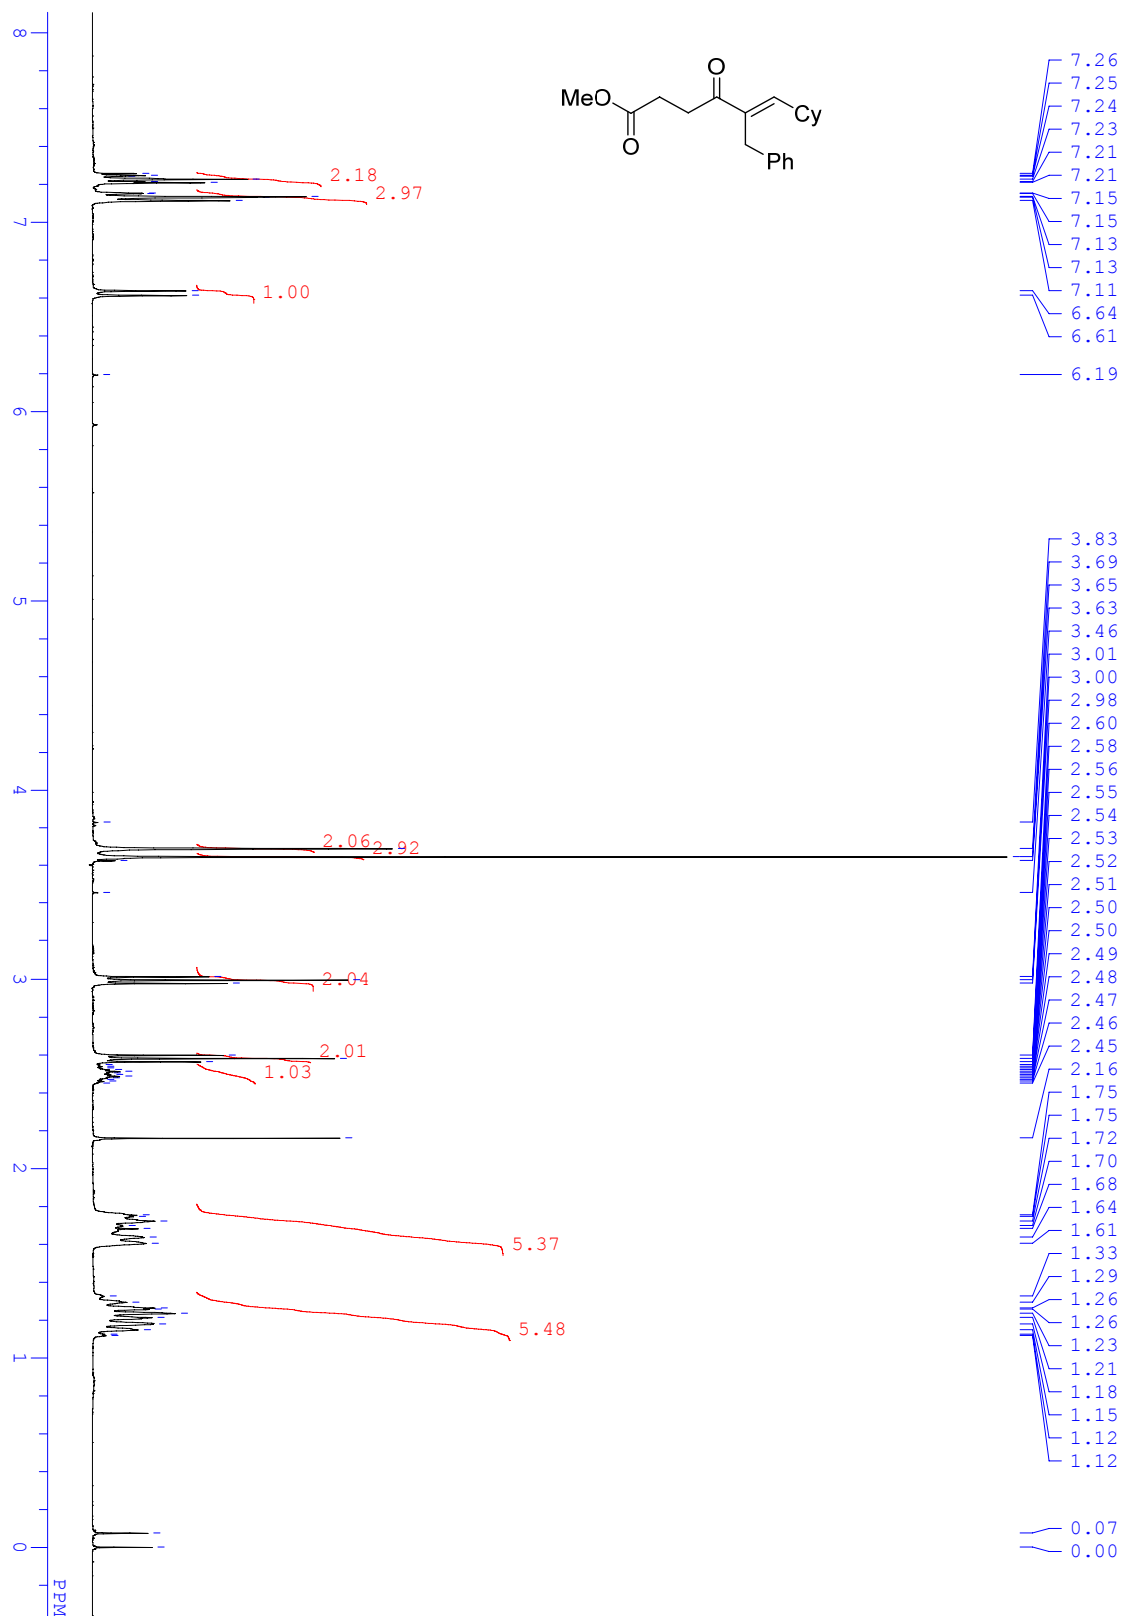

$^{13}\text{C}$   $\{^1\text{H}\}$  NMR spectrum of **4e**

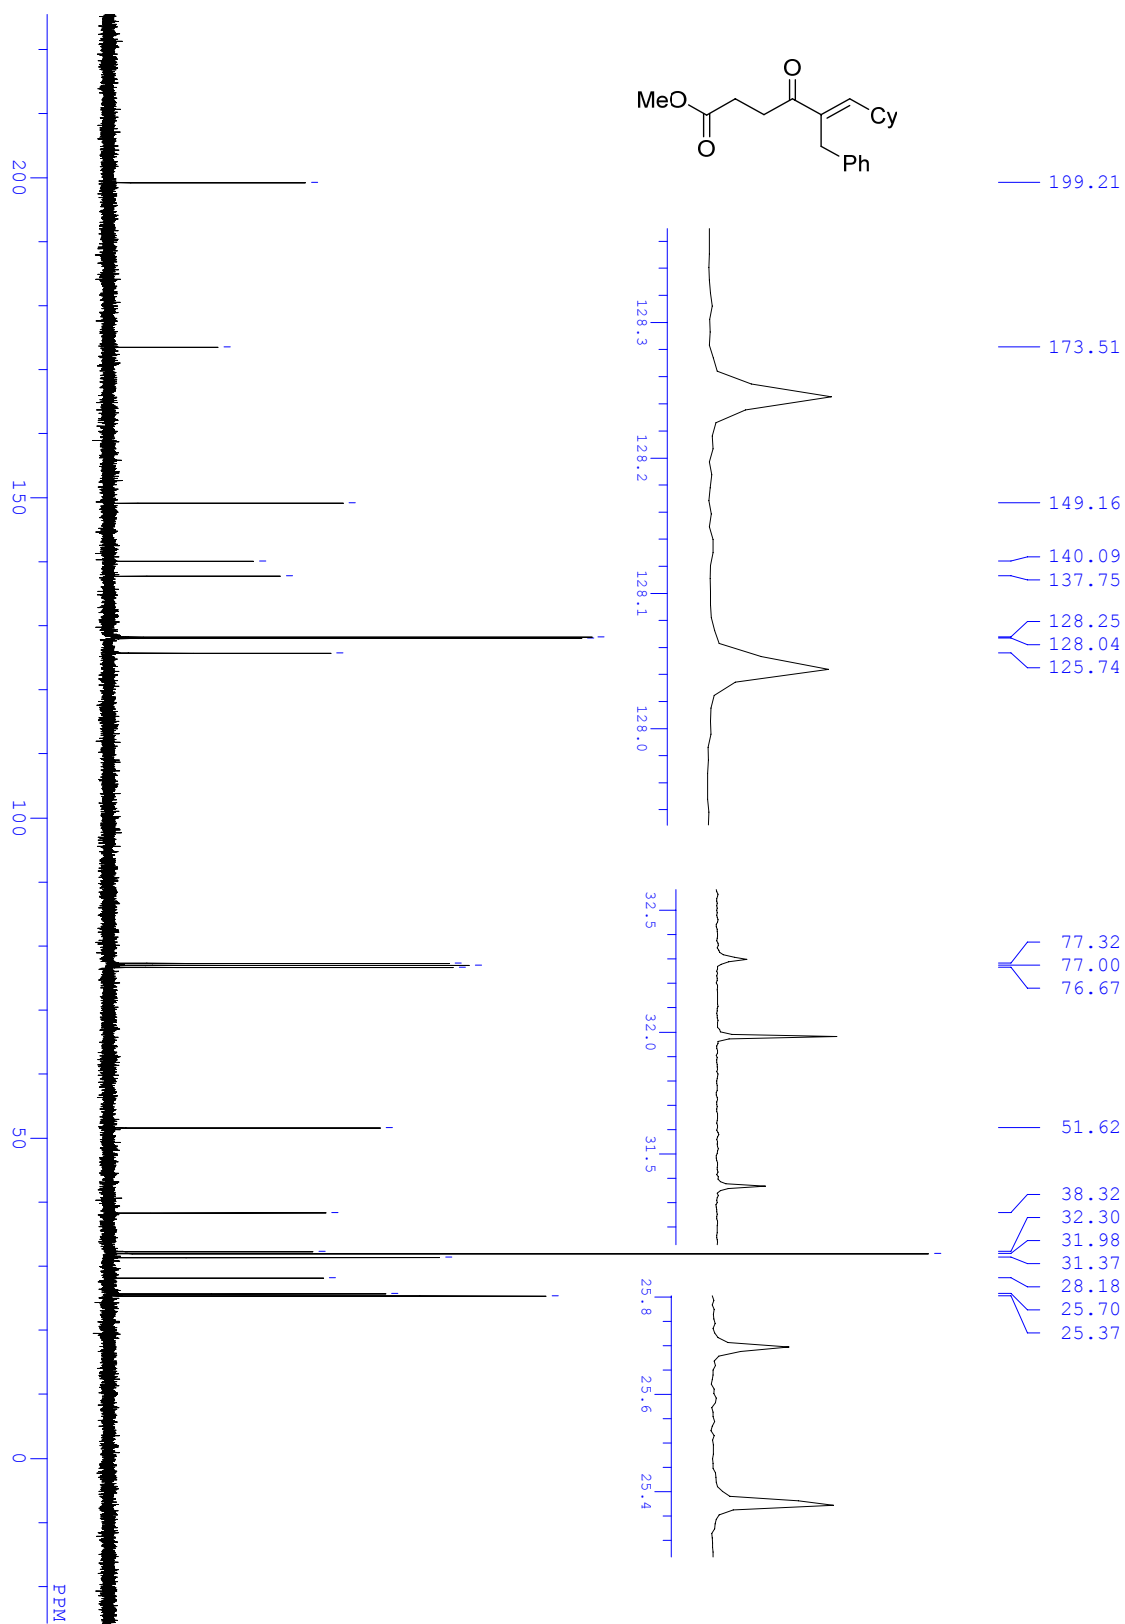

<sup>1</sup>H NMR spectrum of 4g

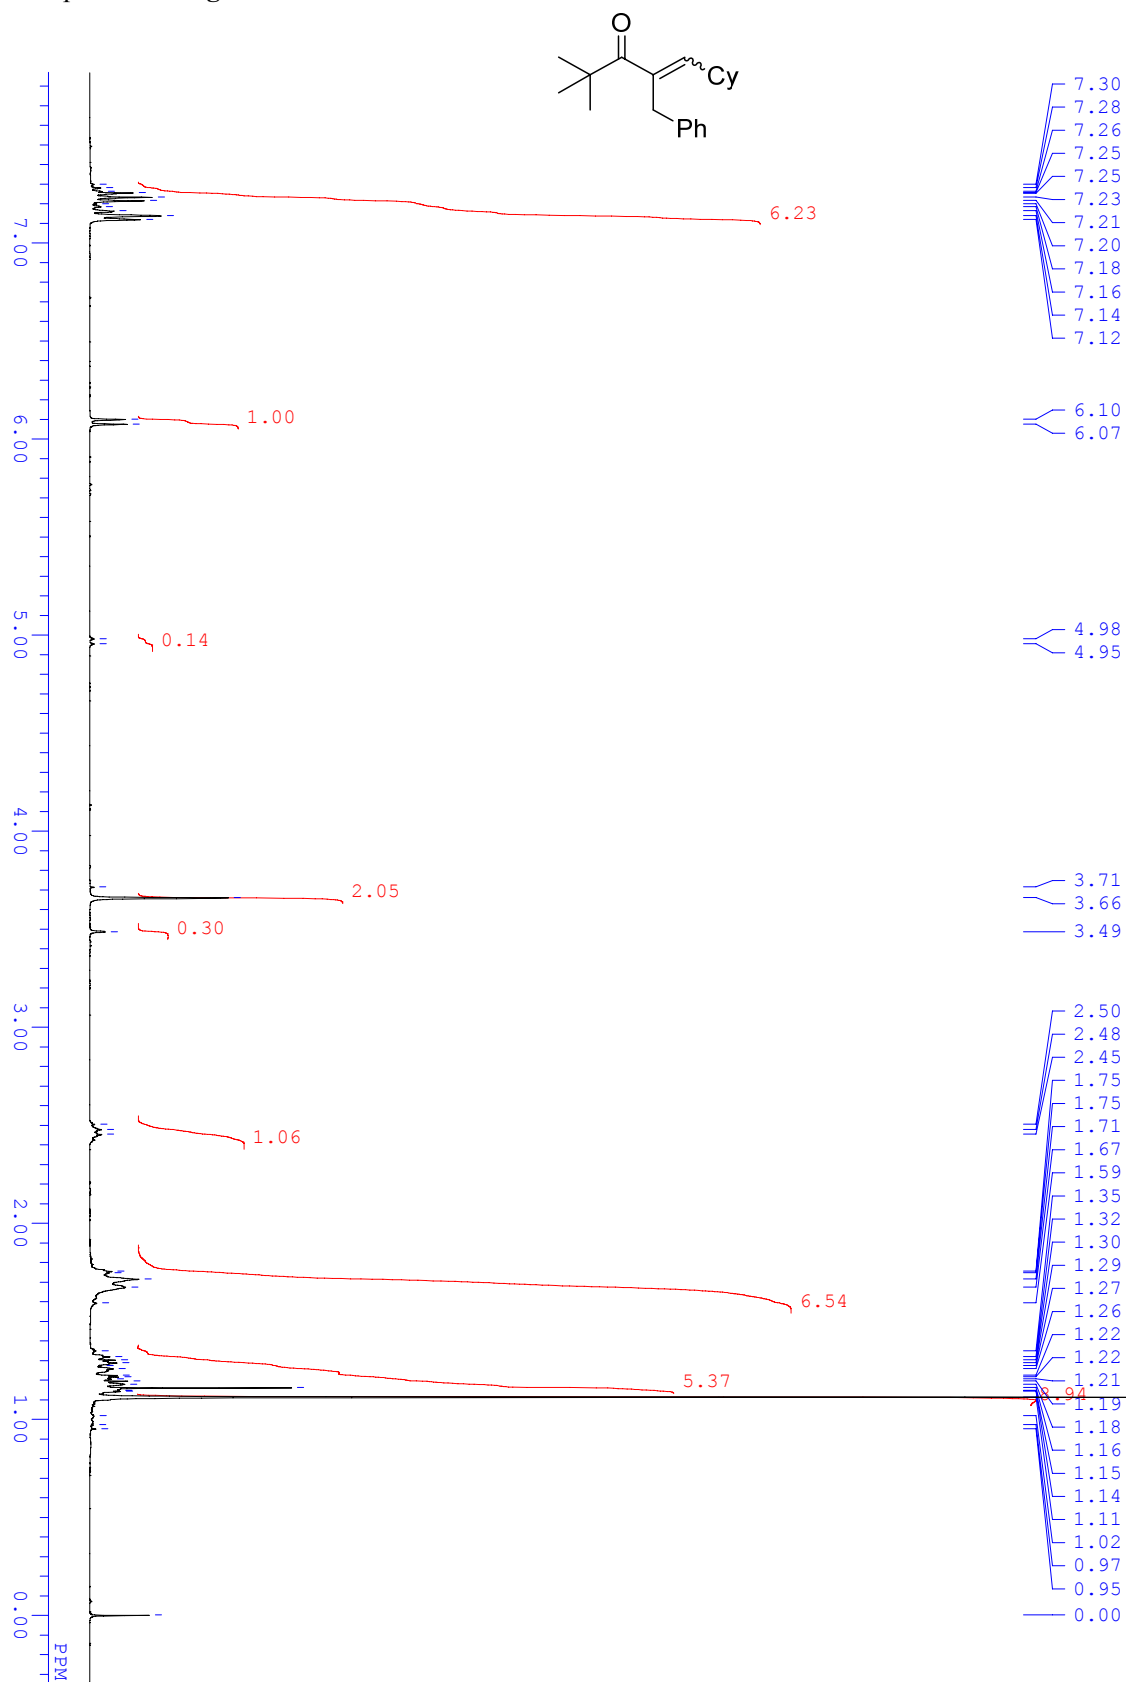

$^{13}\text{C}$   $\{^1\text{H}\}$  NMR spectrum of **4g**

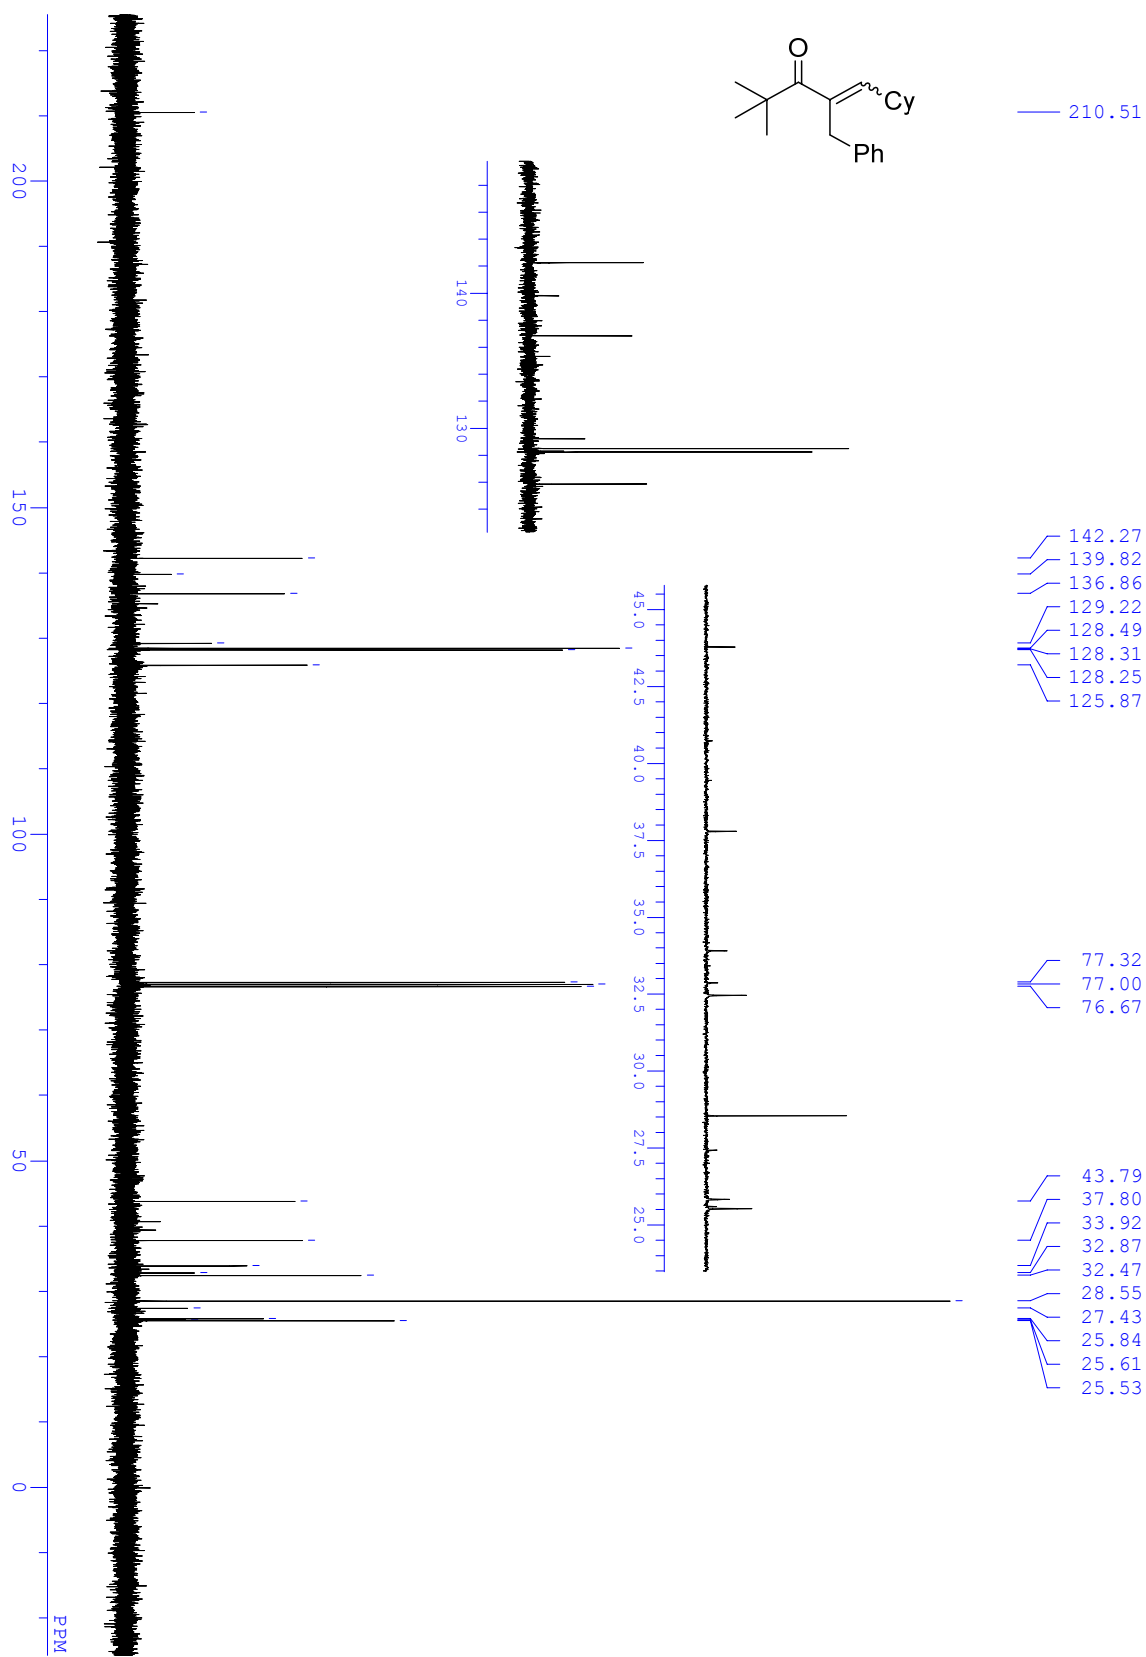



<sup>1</sup>H NMR spectrum of 4i

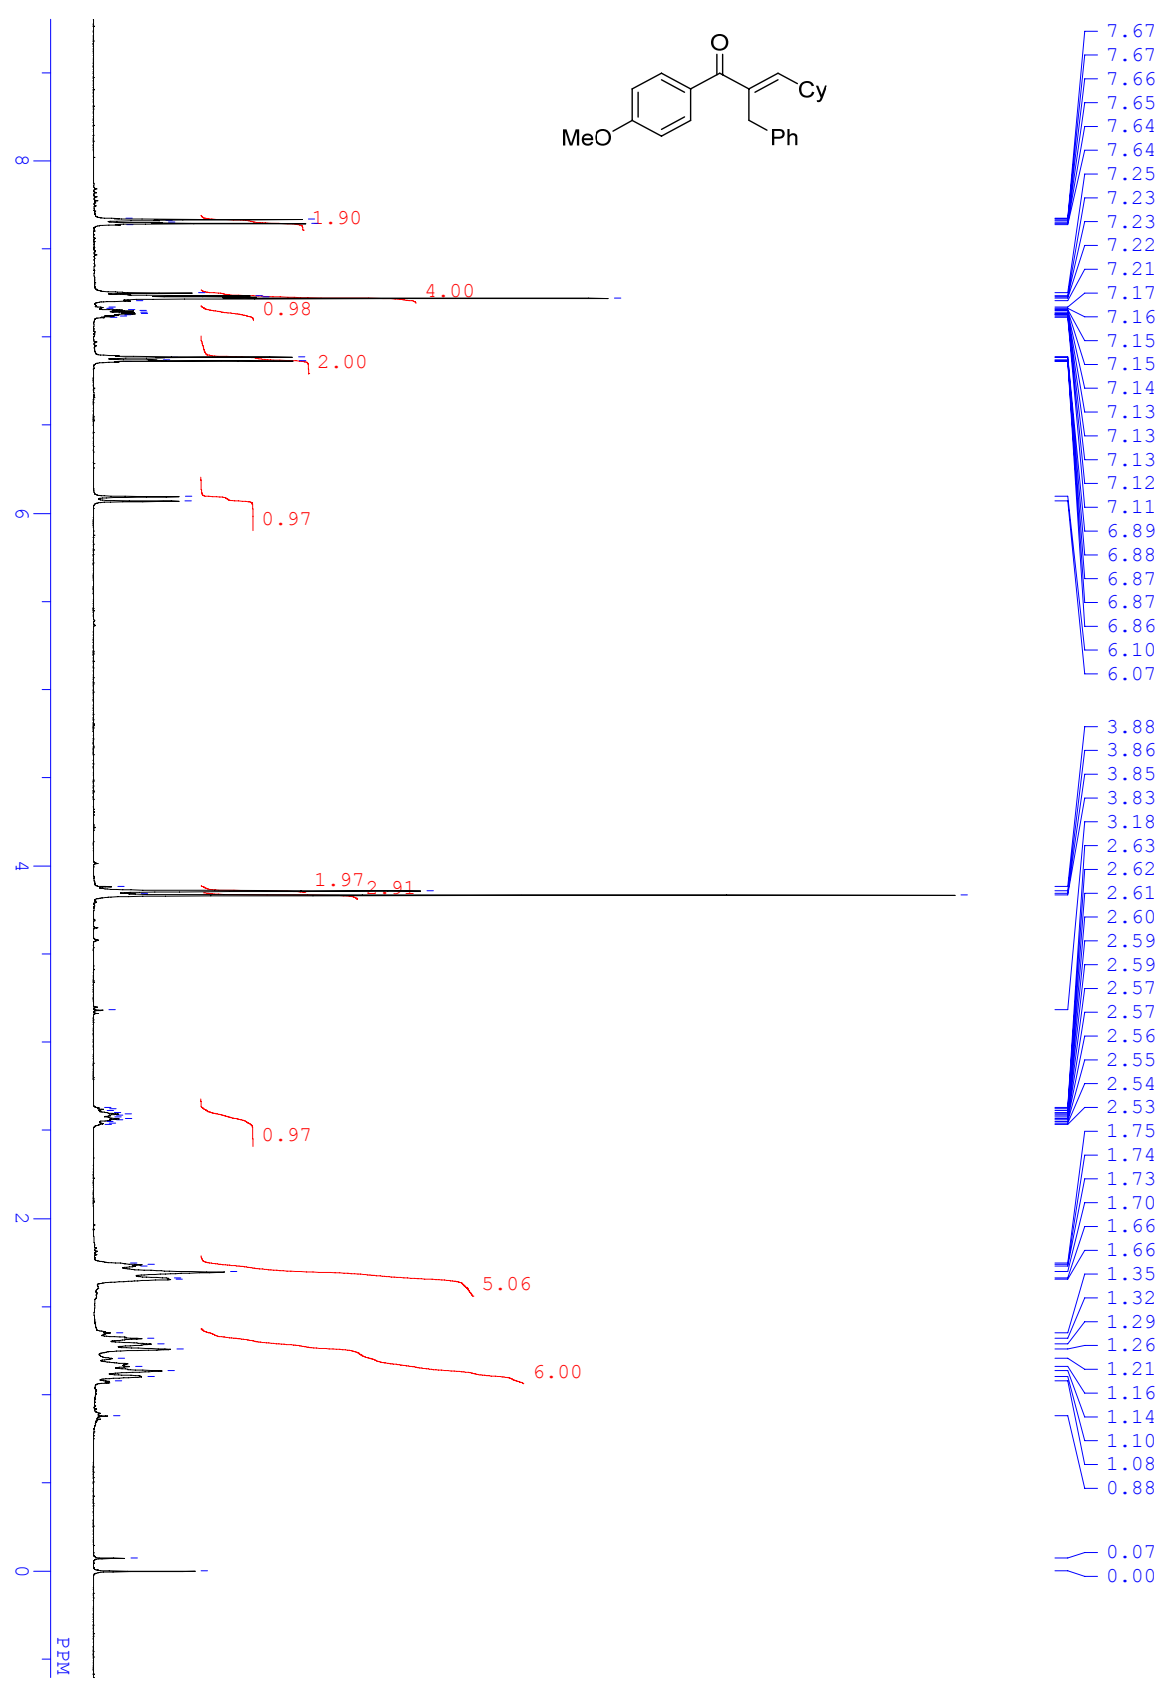

$^{13}\text{C}$   $\{^1\text{H}\}$  NMR spectrum of **4i**

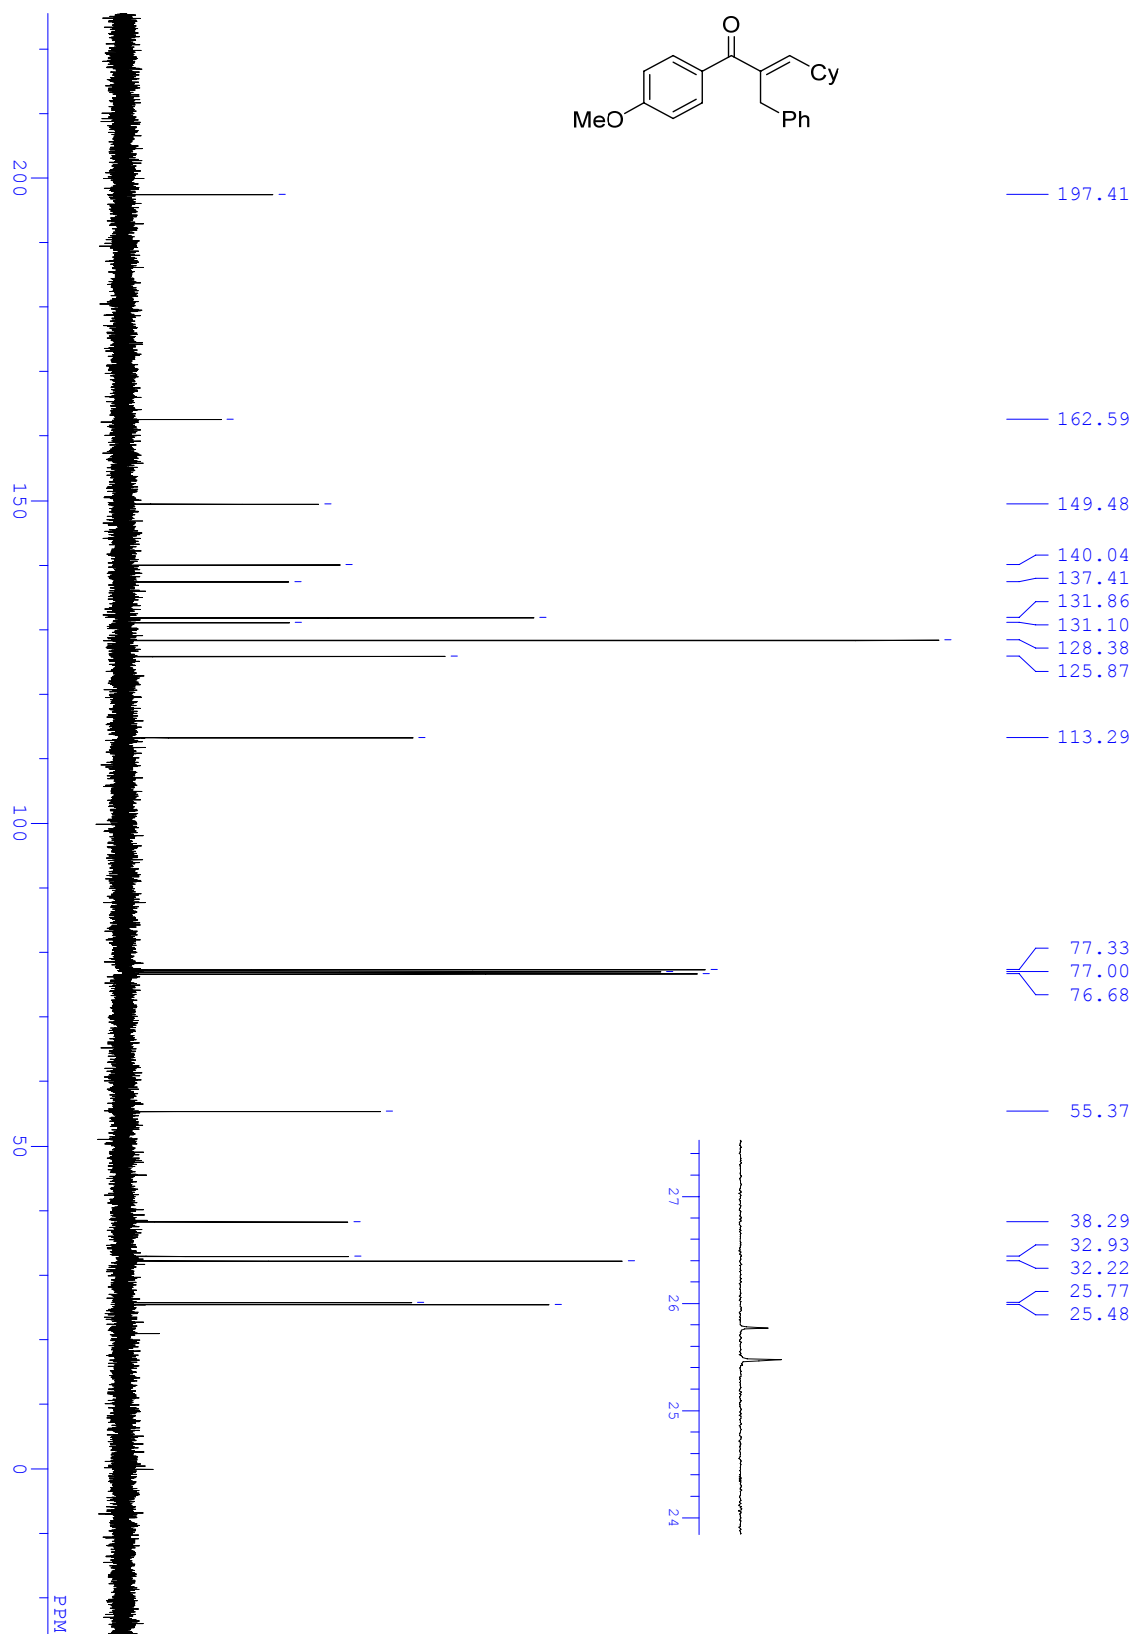

<sup>1</sup>H NMR spectrum of 4k

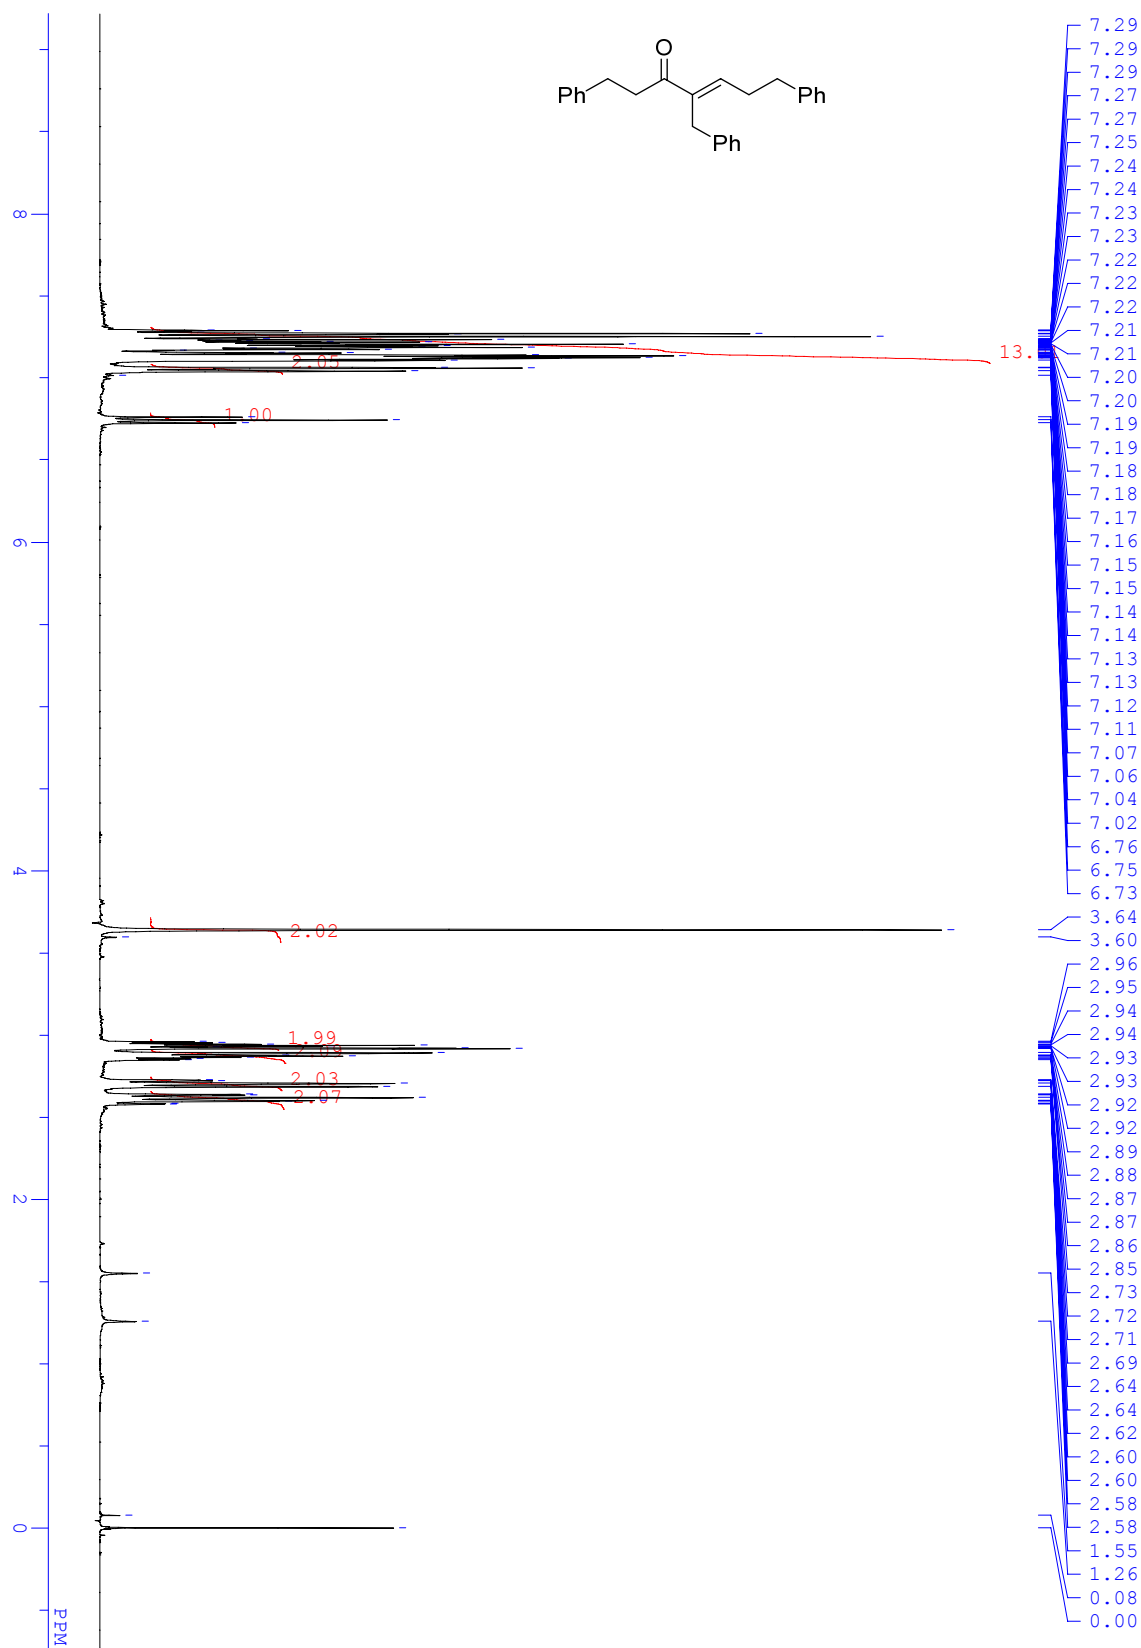

$^{13}\text{C}$   $\{^1\text{H}\}$  NMR spectrum of **4k**

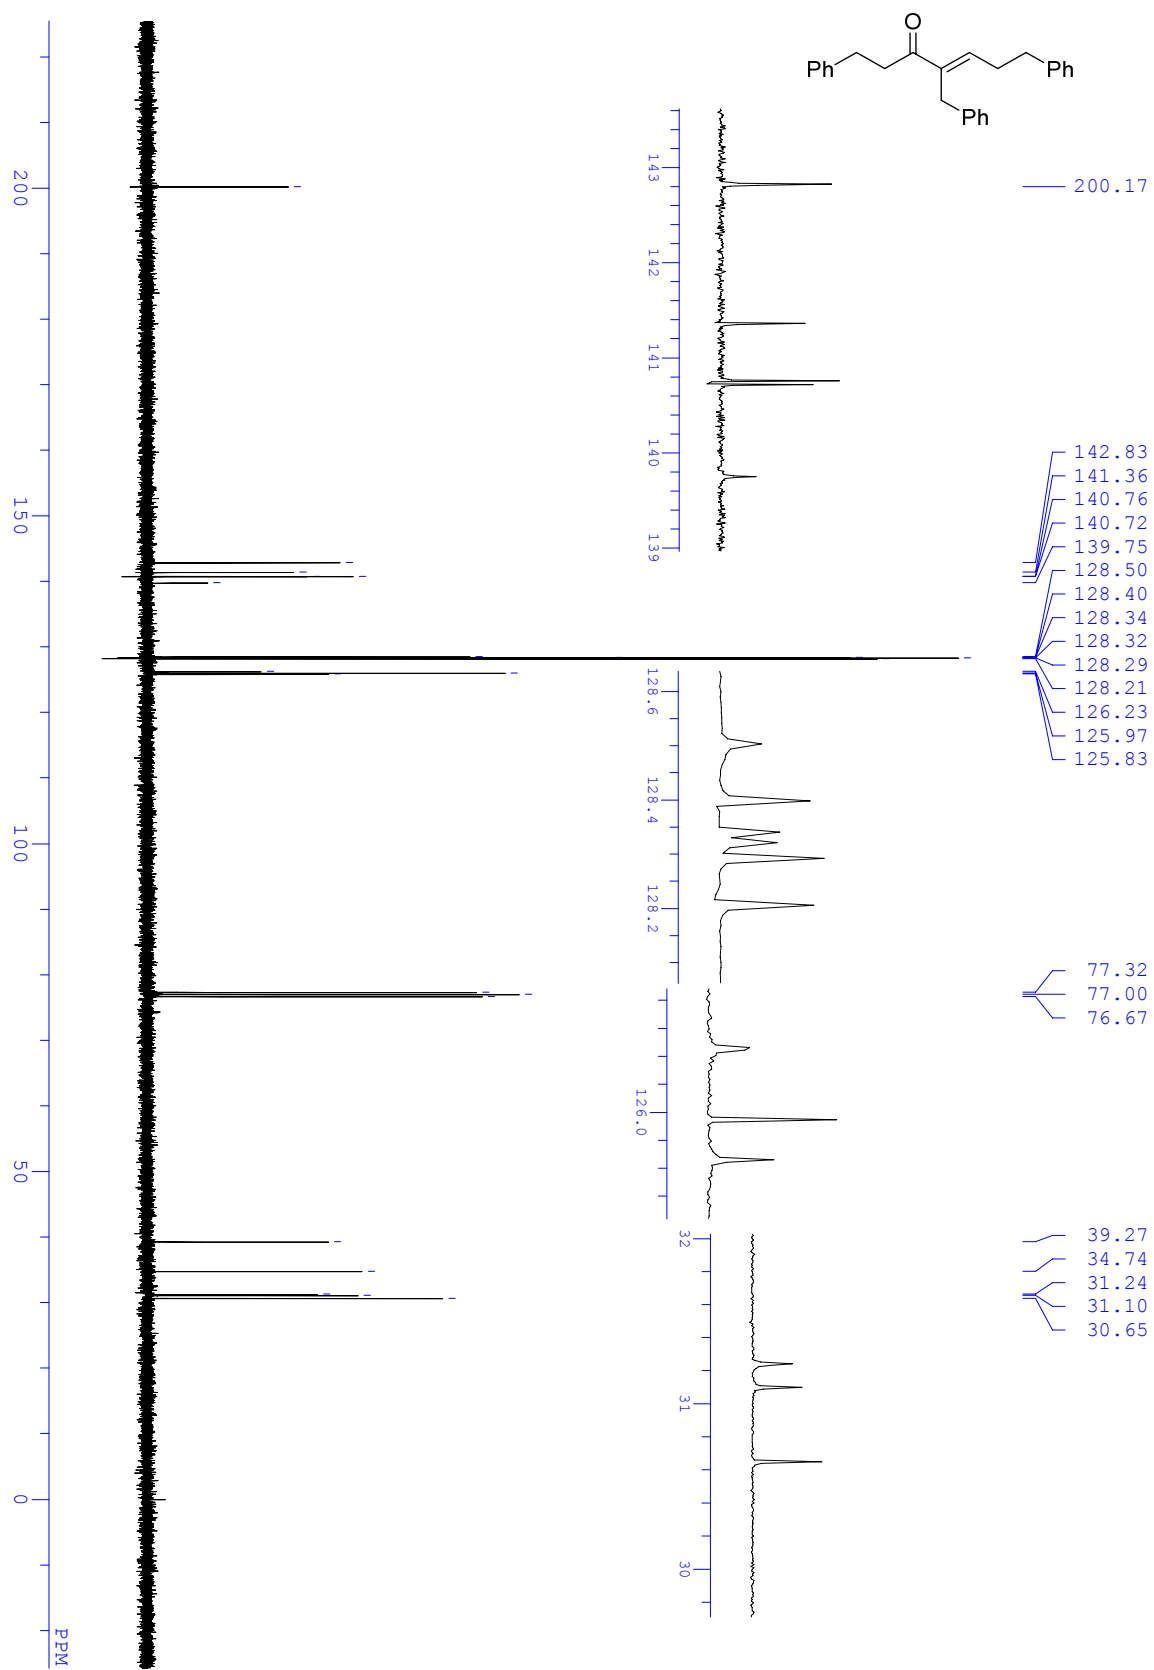

<sup>1</sup>H NMR spectrum of 4o

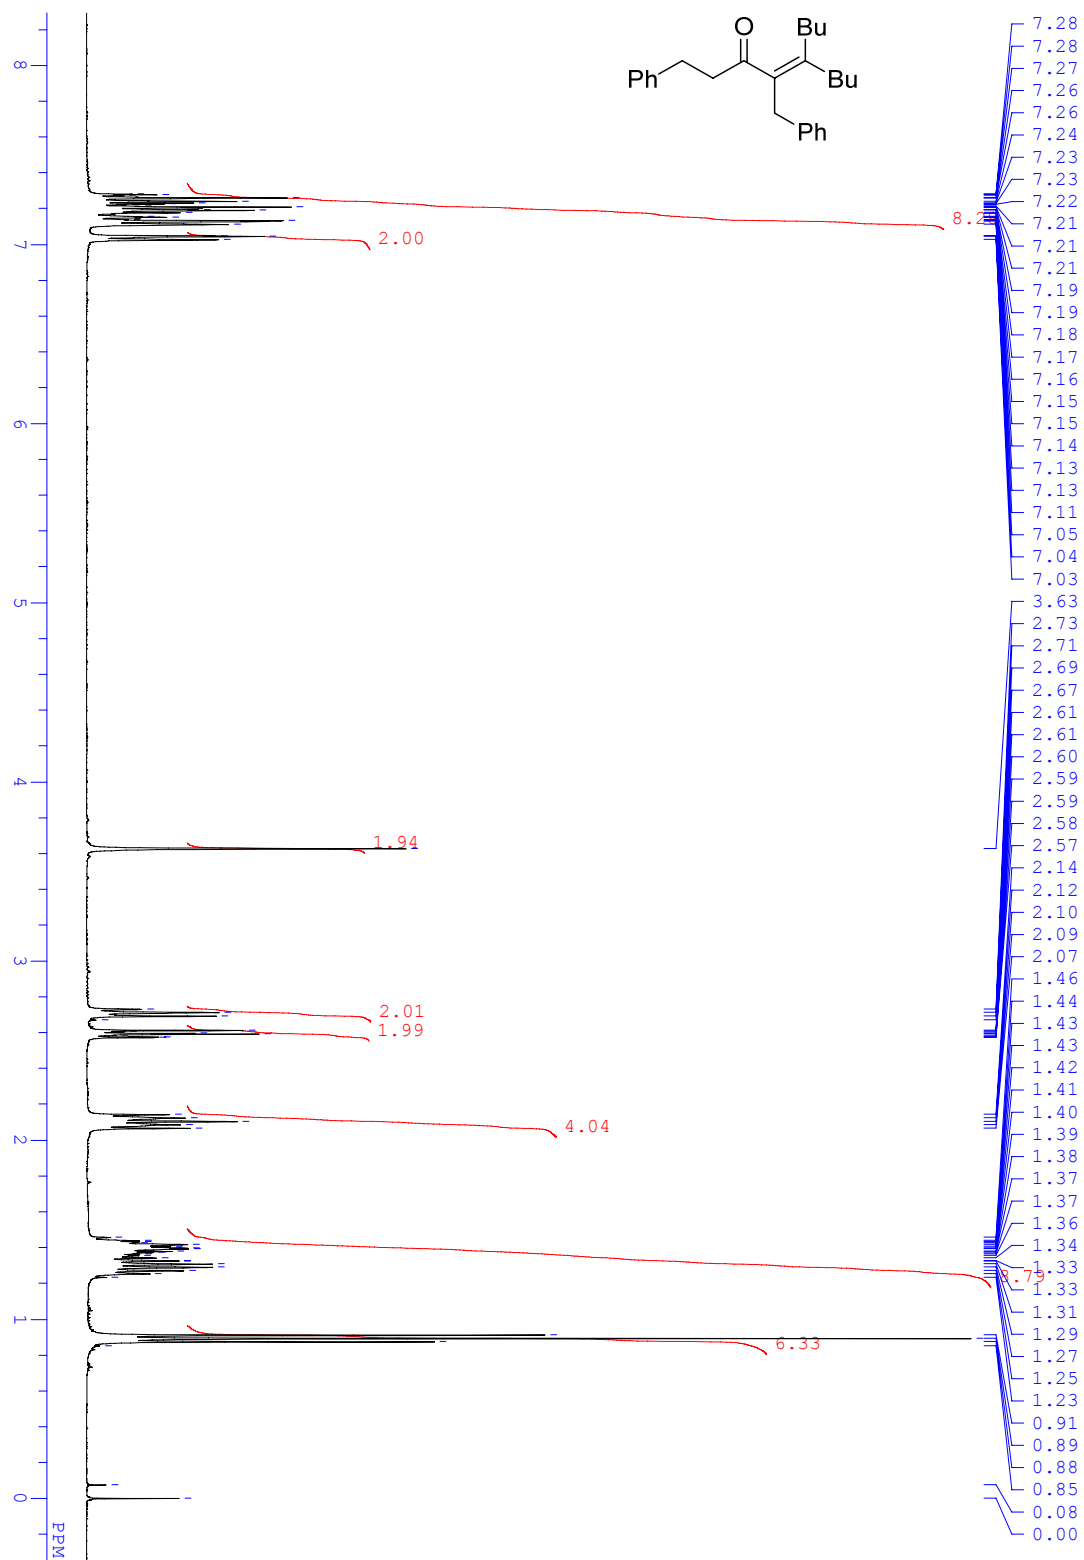

$^{13}\text{C}$   $\{^1\text{H}\}$  NMR spectrum of **4o**

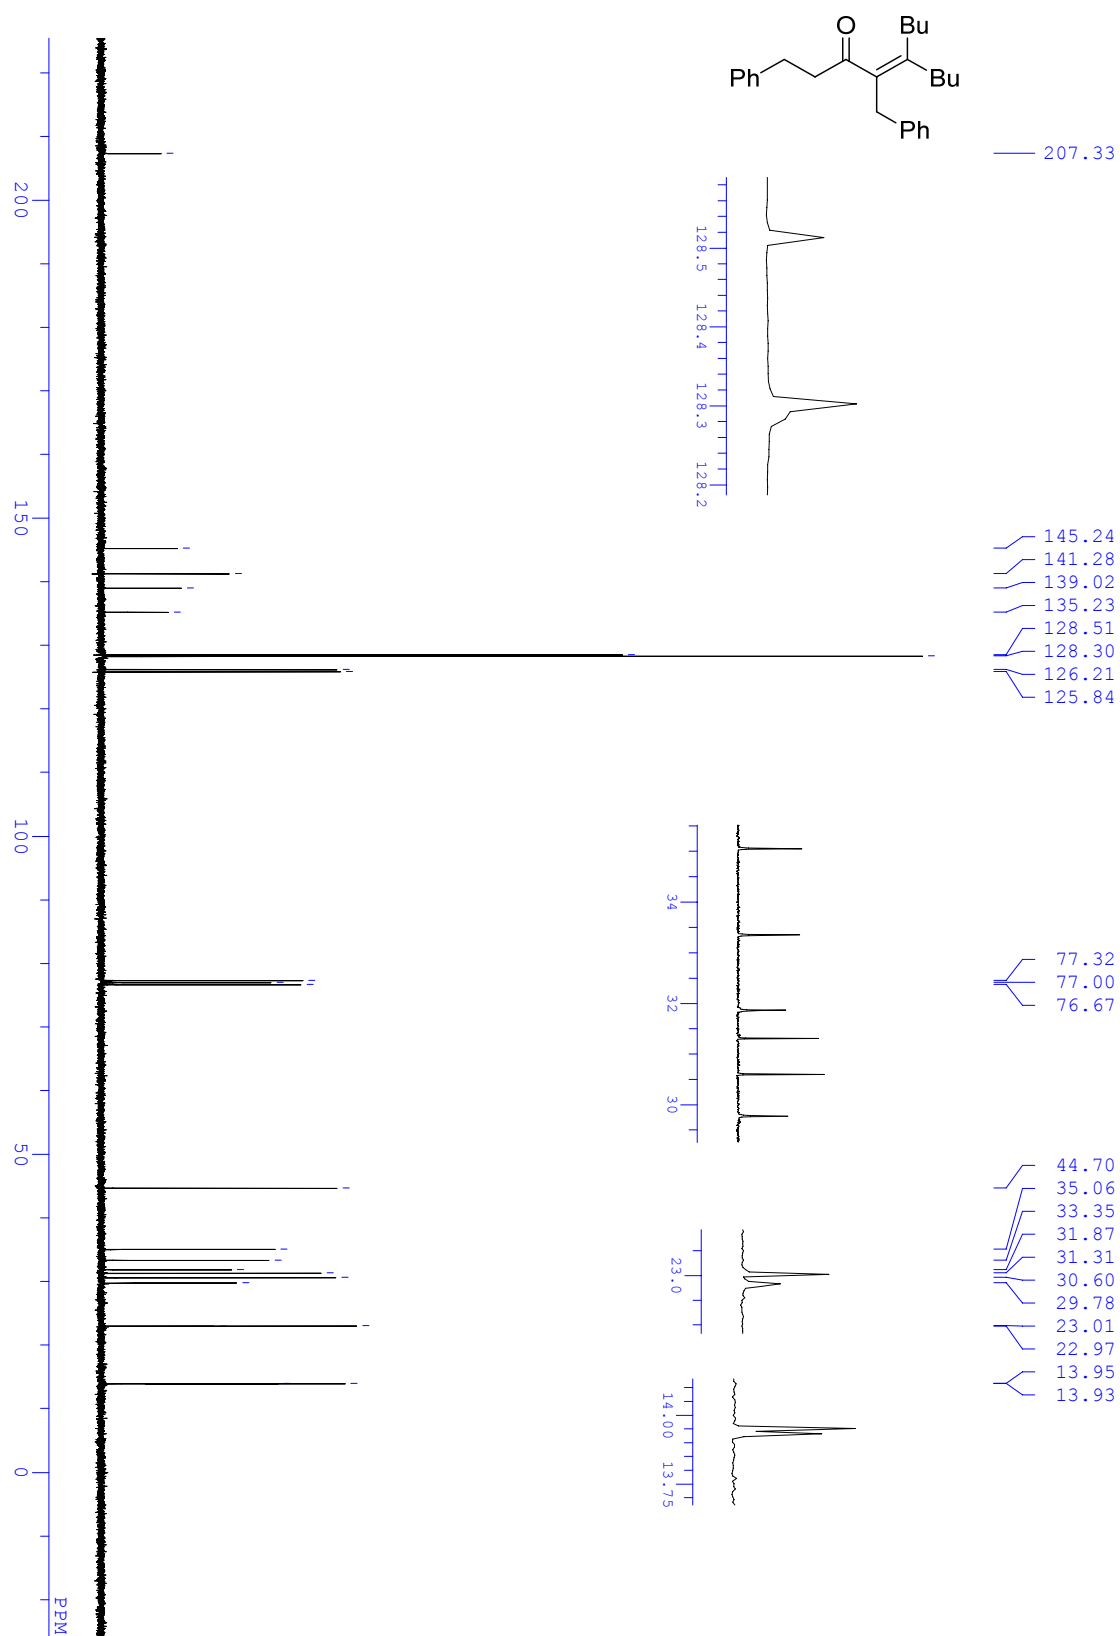

<sup>1</sup>H NMR spectrum of 4r

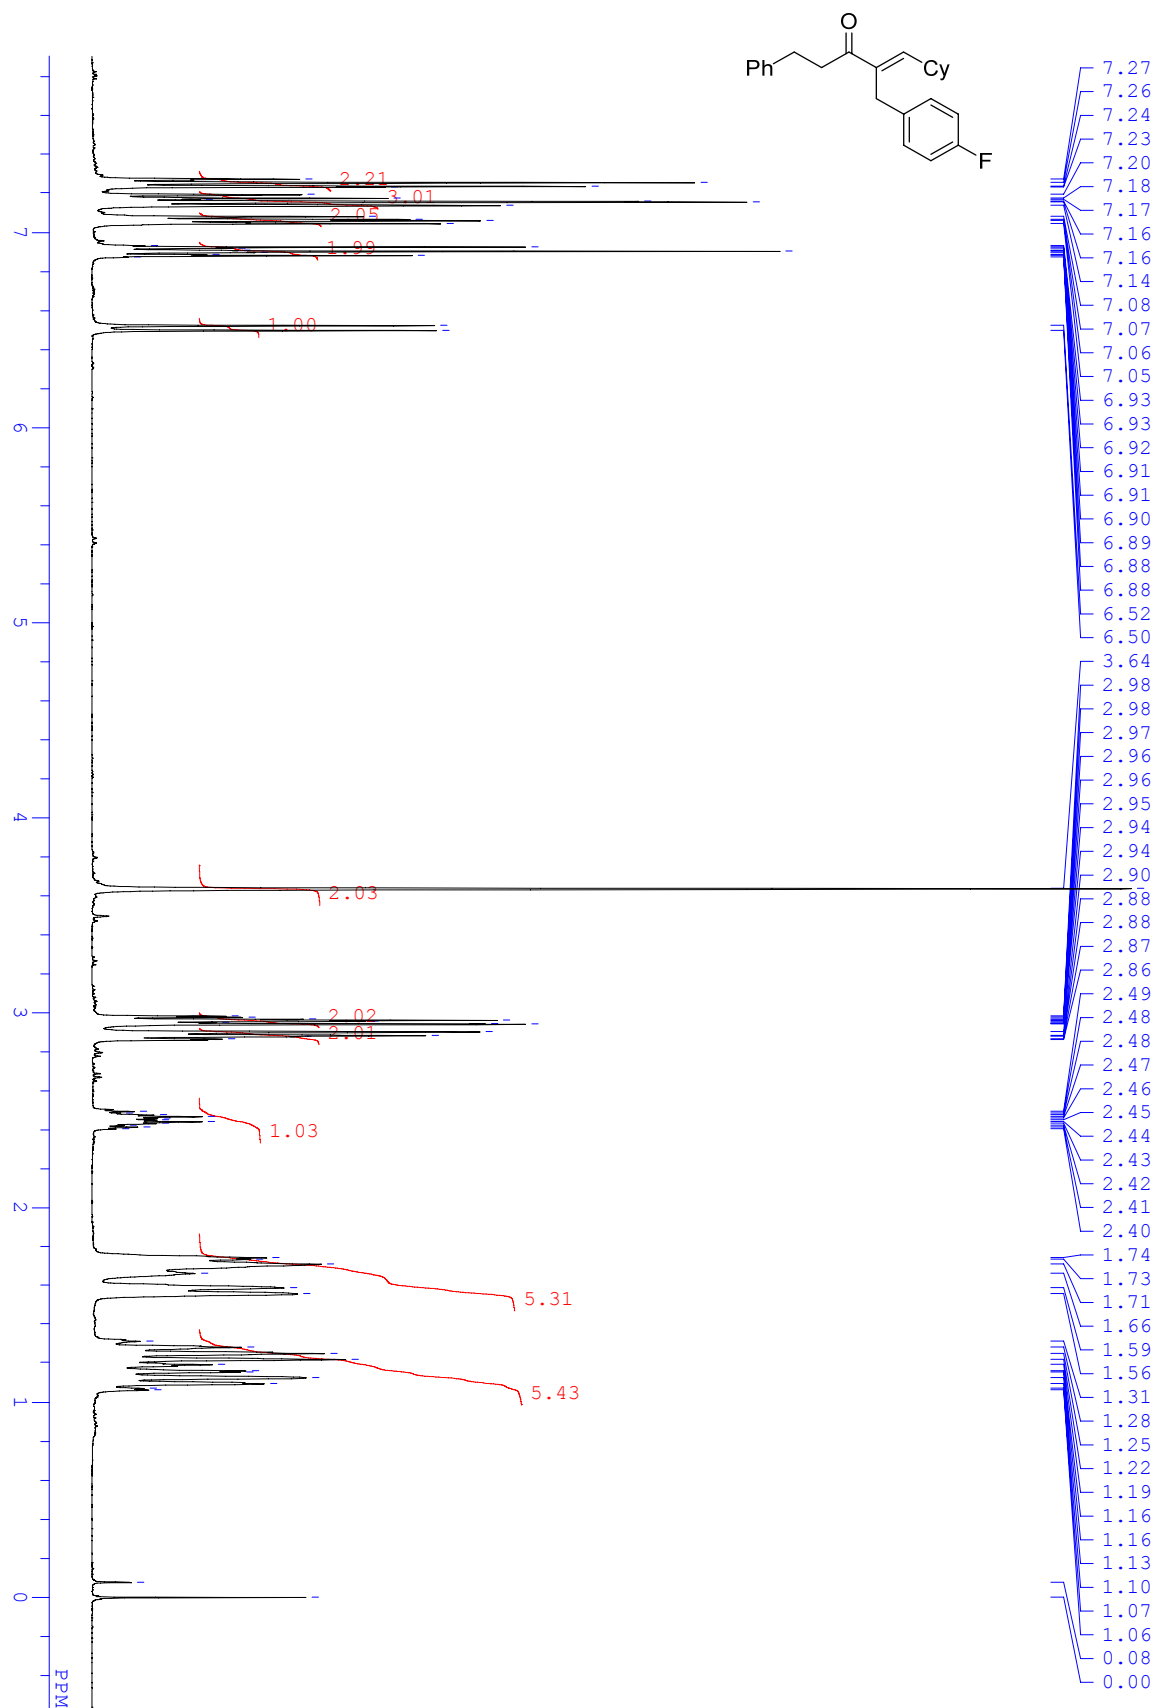

$^{13}\text{C}$   $\{^1\text{H}\}$  NMR spectrum of **4r**

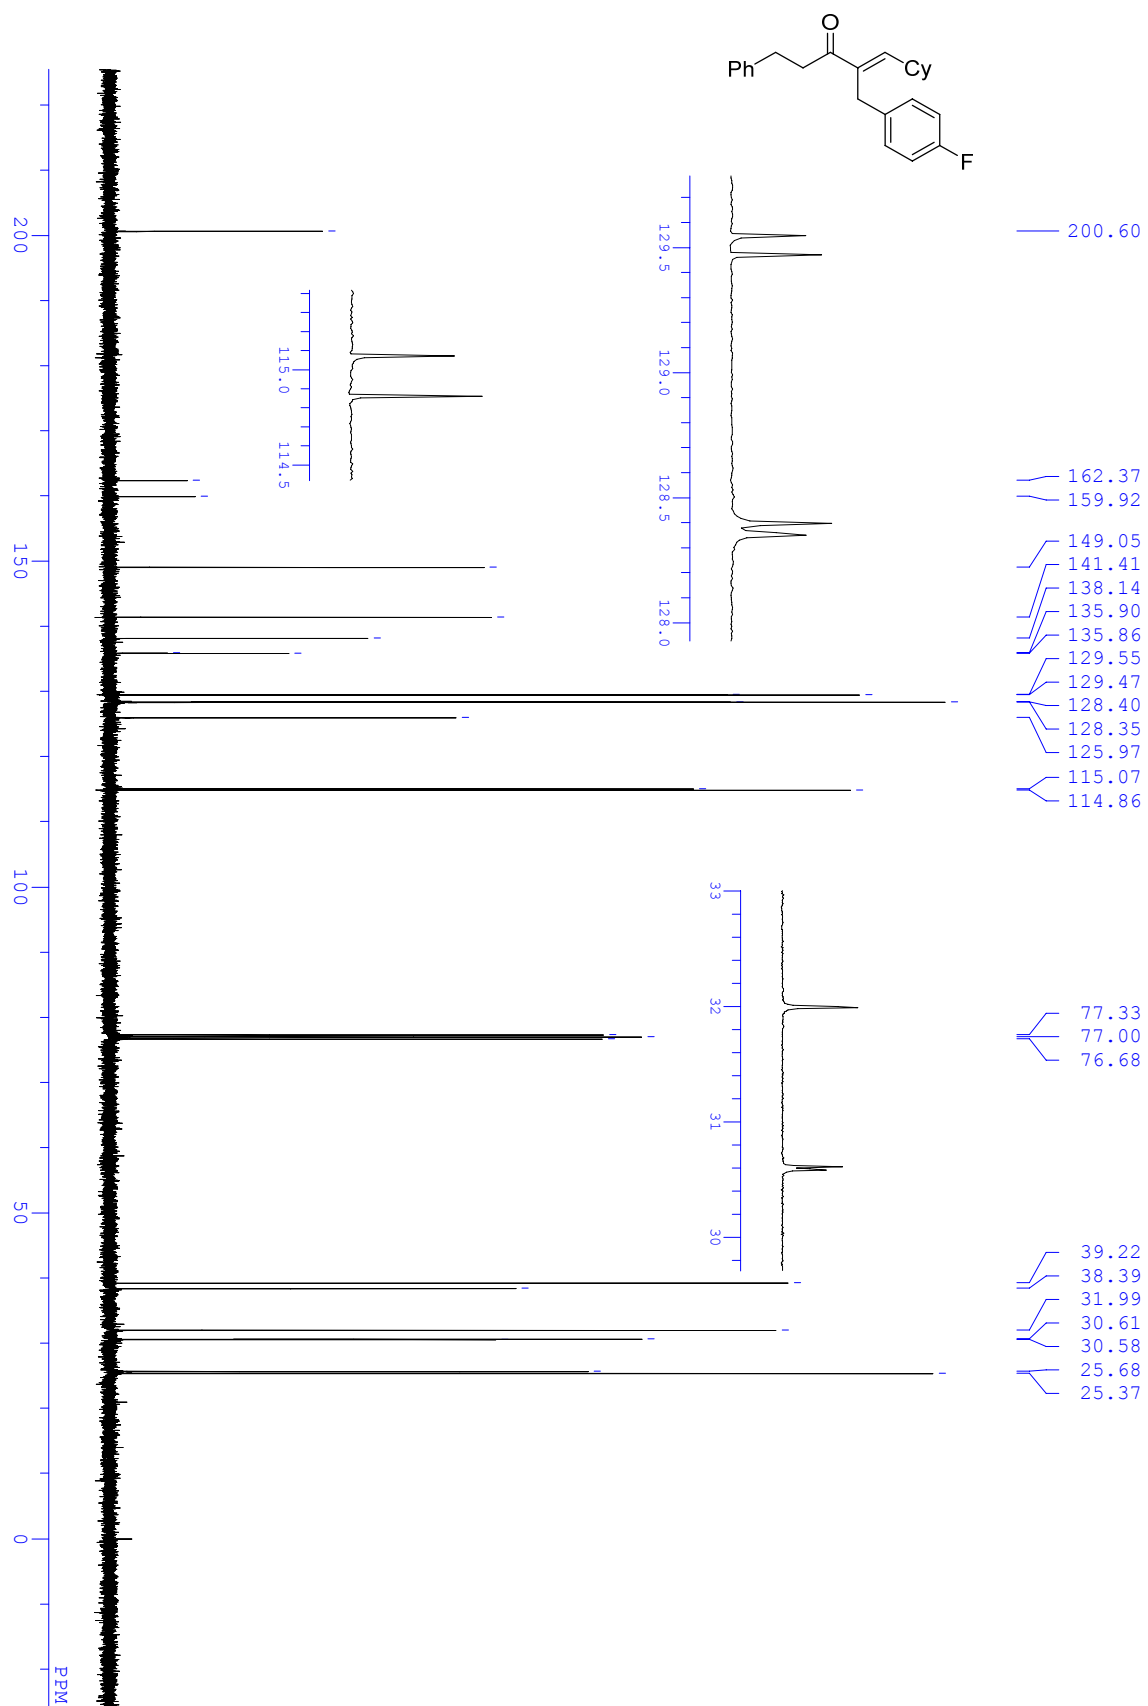



<sup>1</sup>H NMR spectrum of 4t

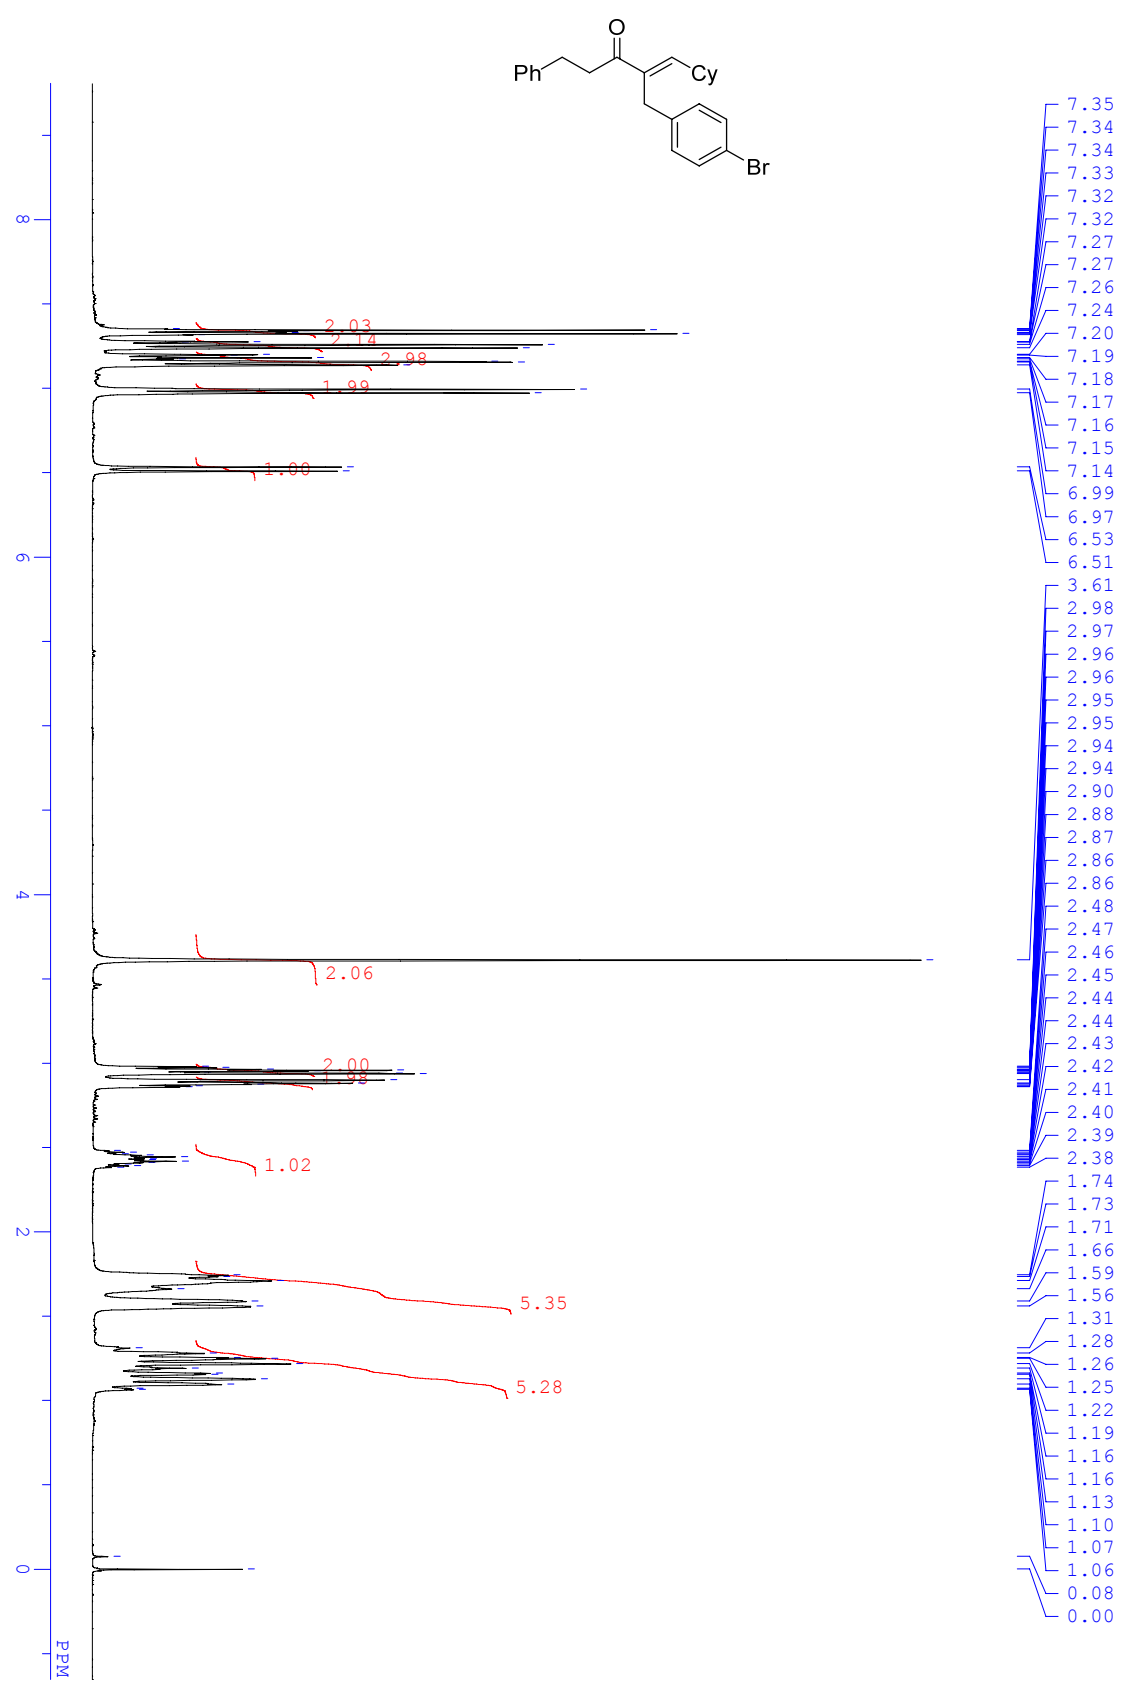

$^{13}\text{C} \{^1\text{H}\}$  NMR spectrum of **4t**

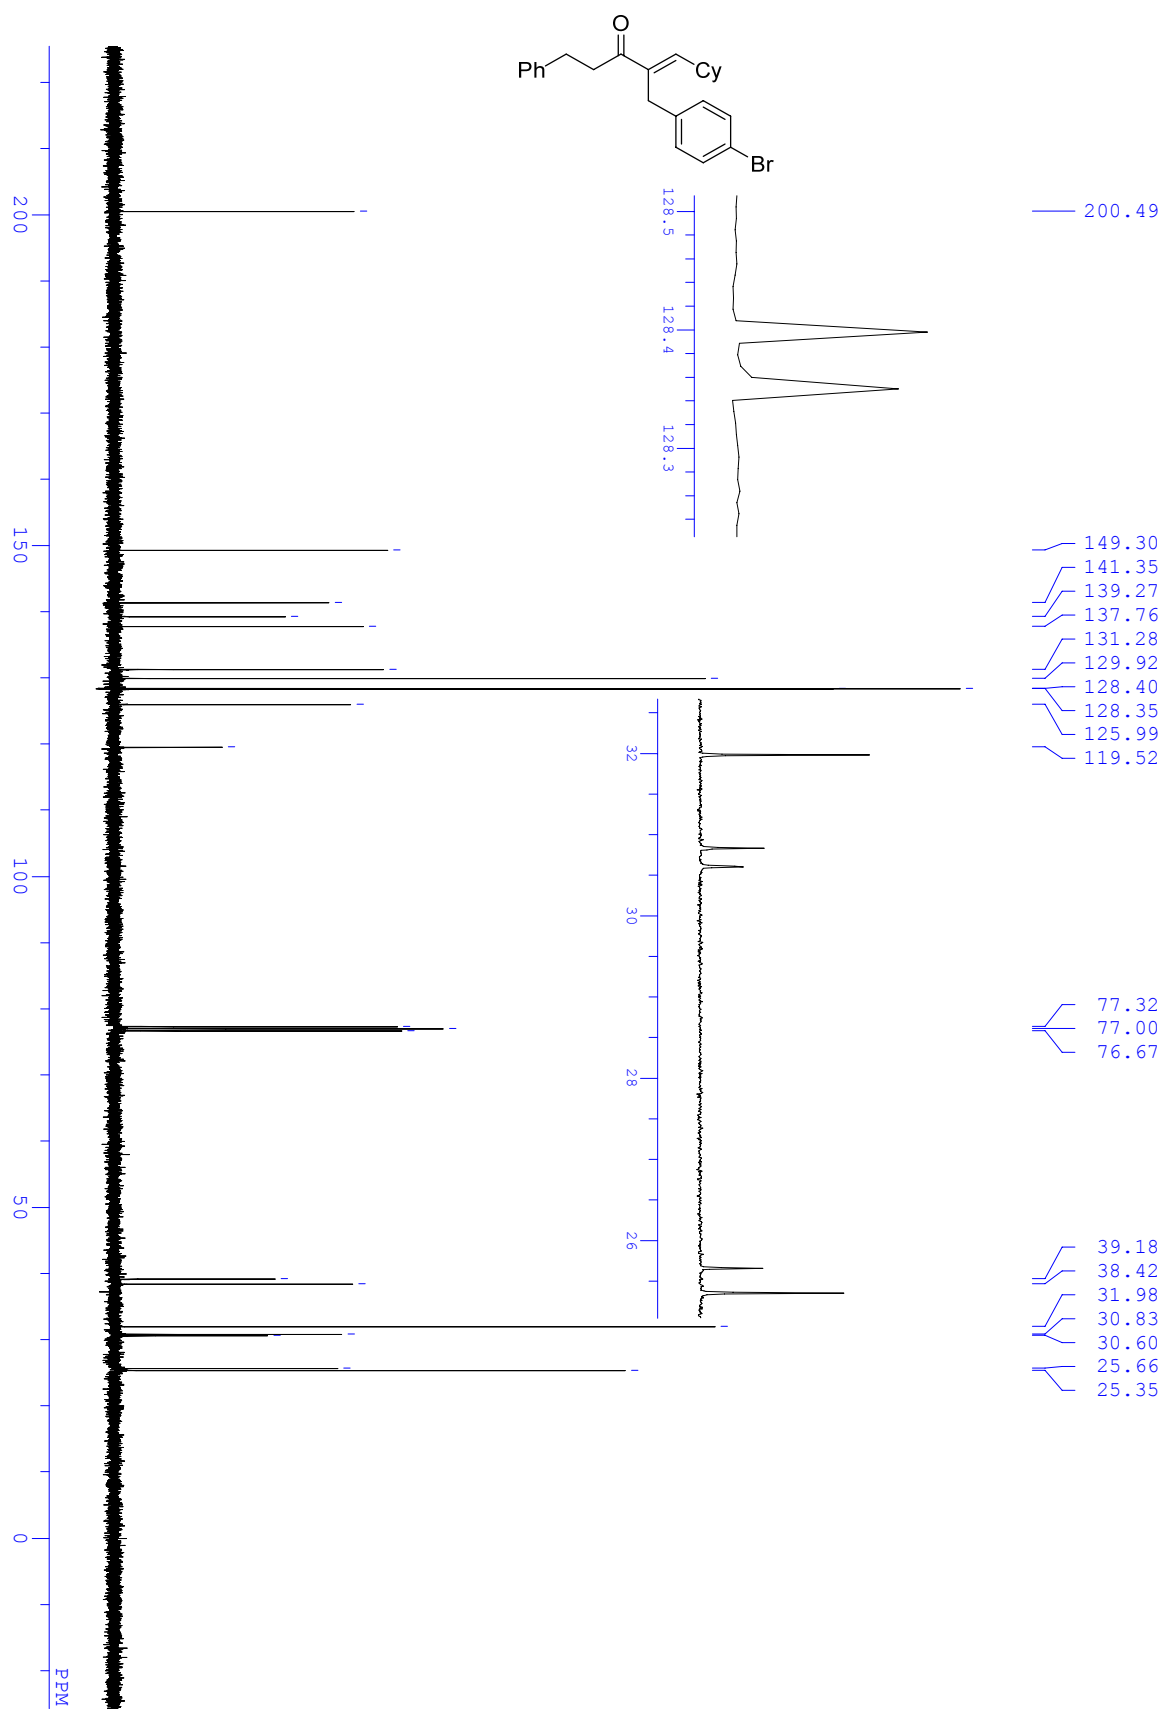

<sup>1</sup>H NMR spectrum of 4u

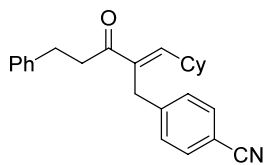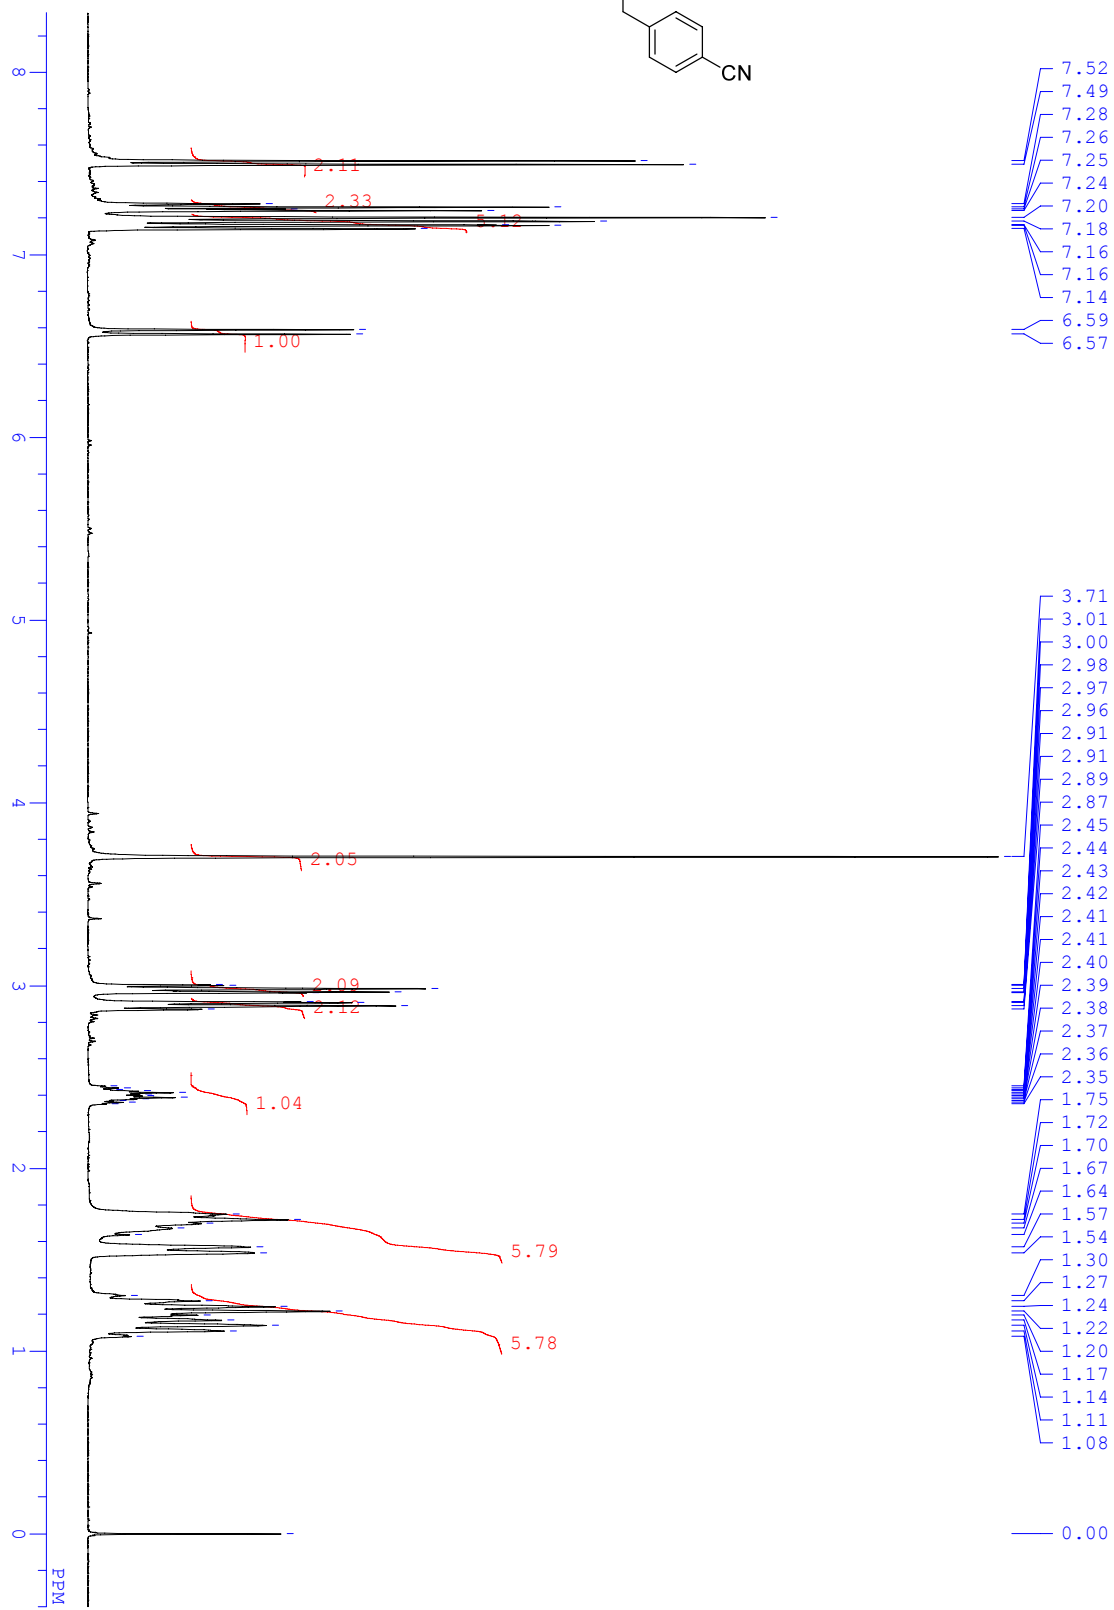

$^{13}\text{C}$   $\{^1\text{H}\}$  NMR spectrum of **4u**

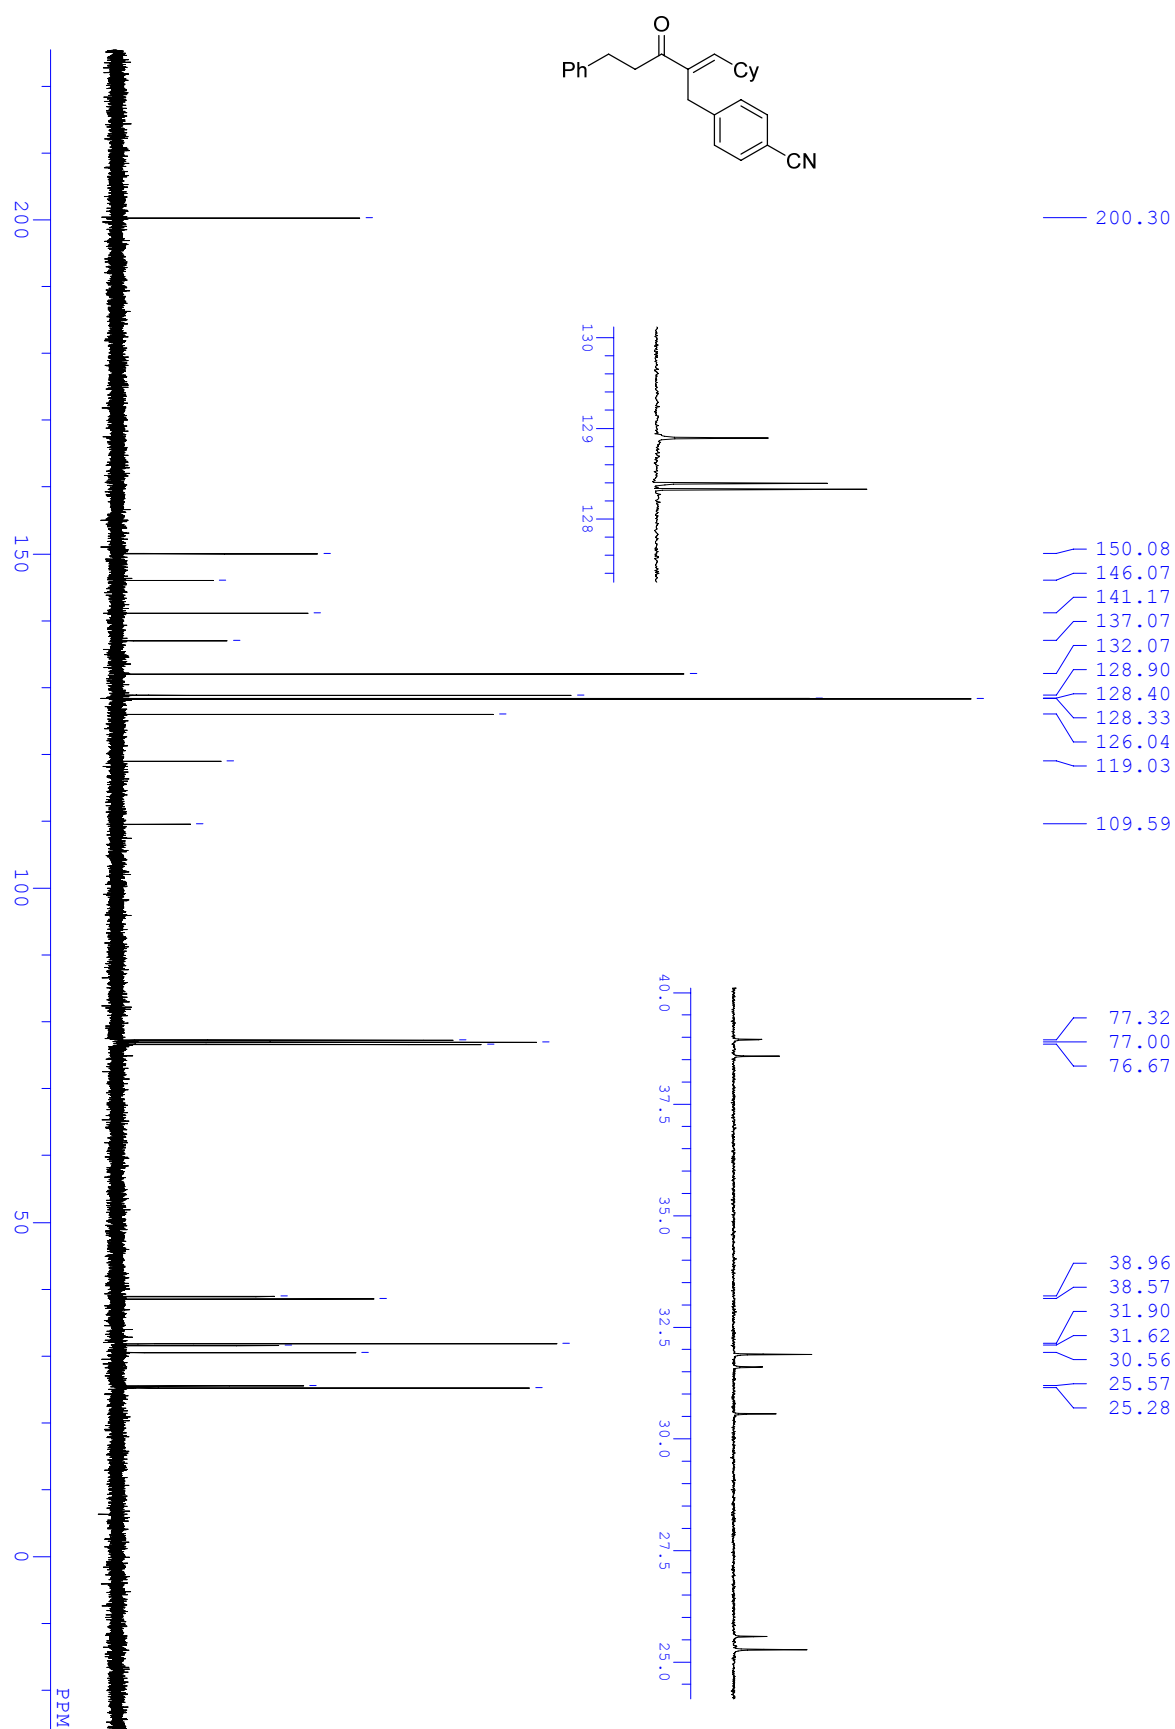

<sup>1</sup>H NMR spectrum of 4v

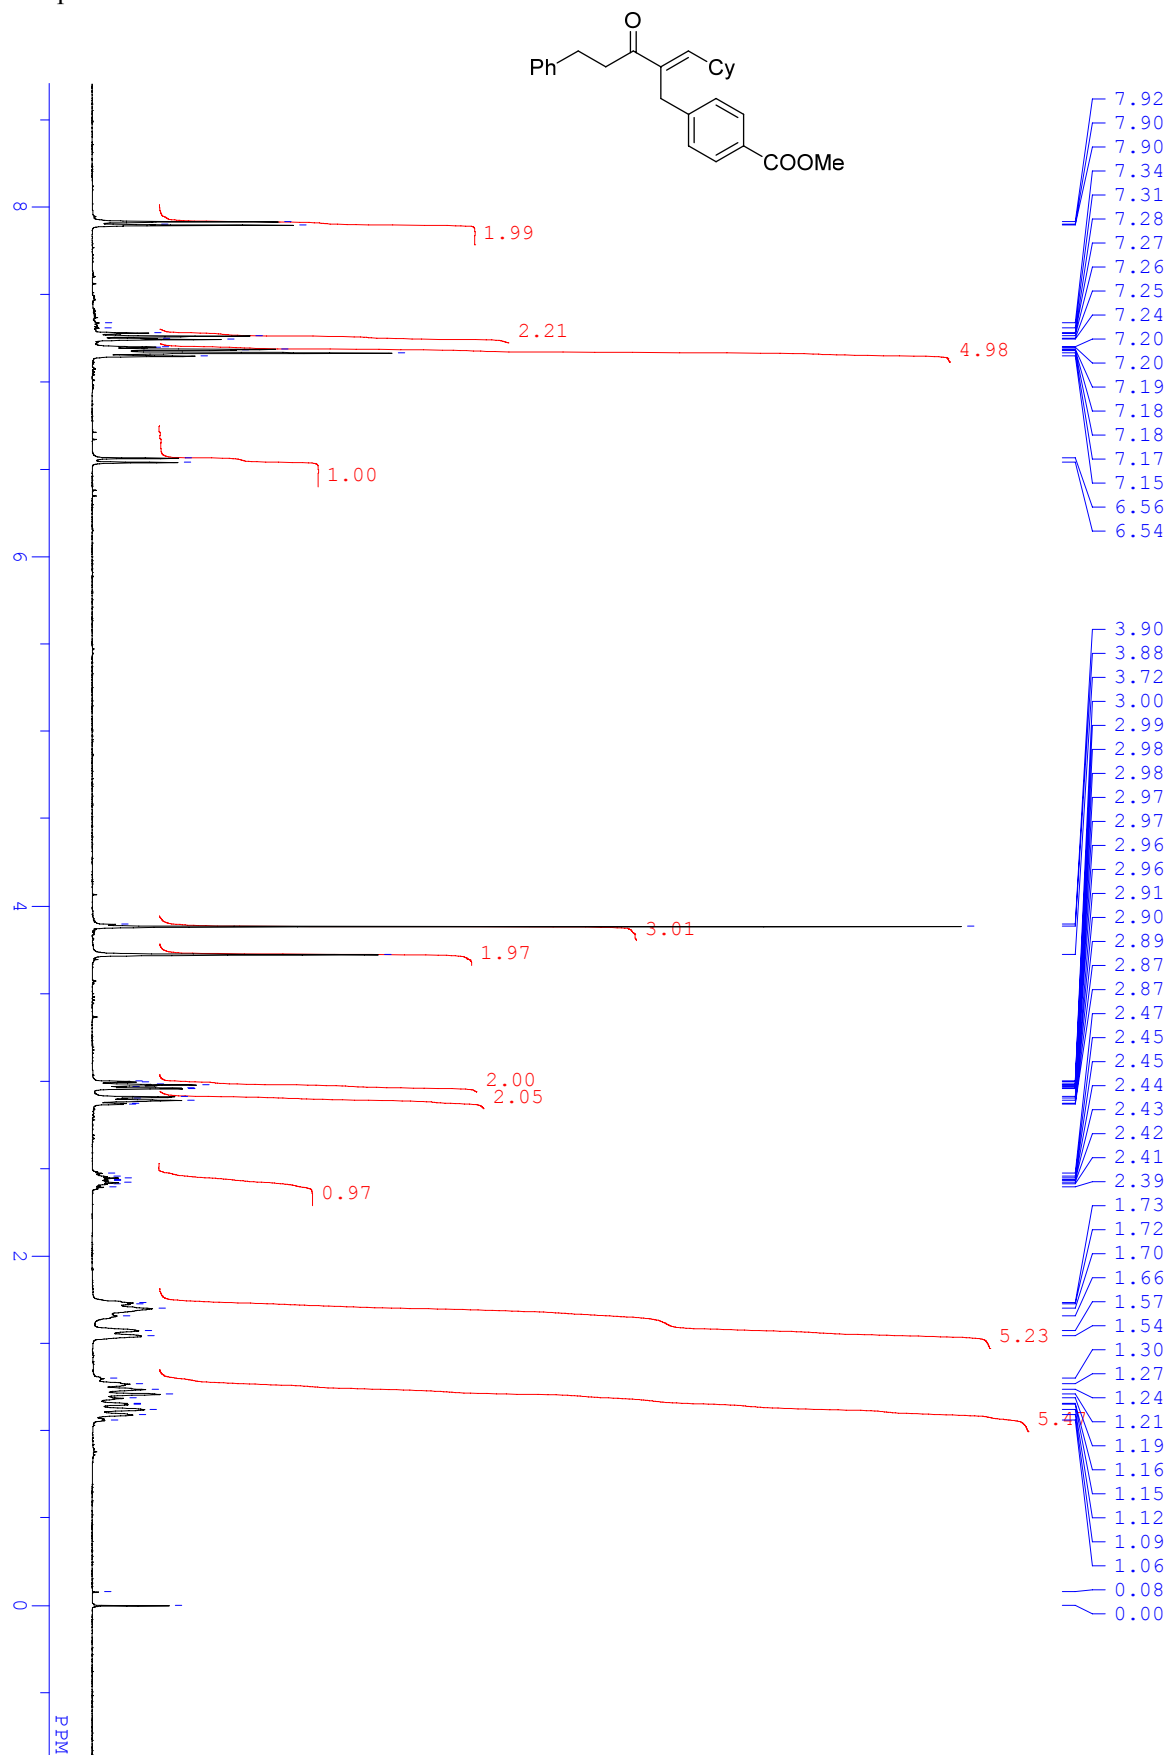

$^{13}\text{C}$   $\{^1\text{H}\}$  NMR spectrum of **4v**

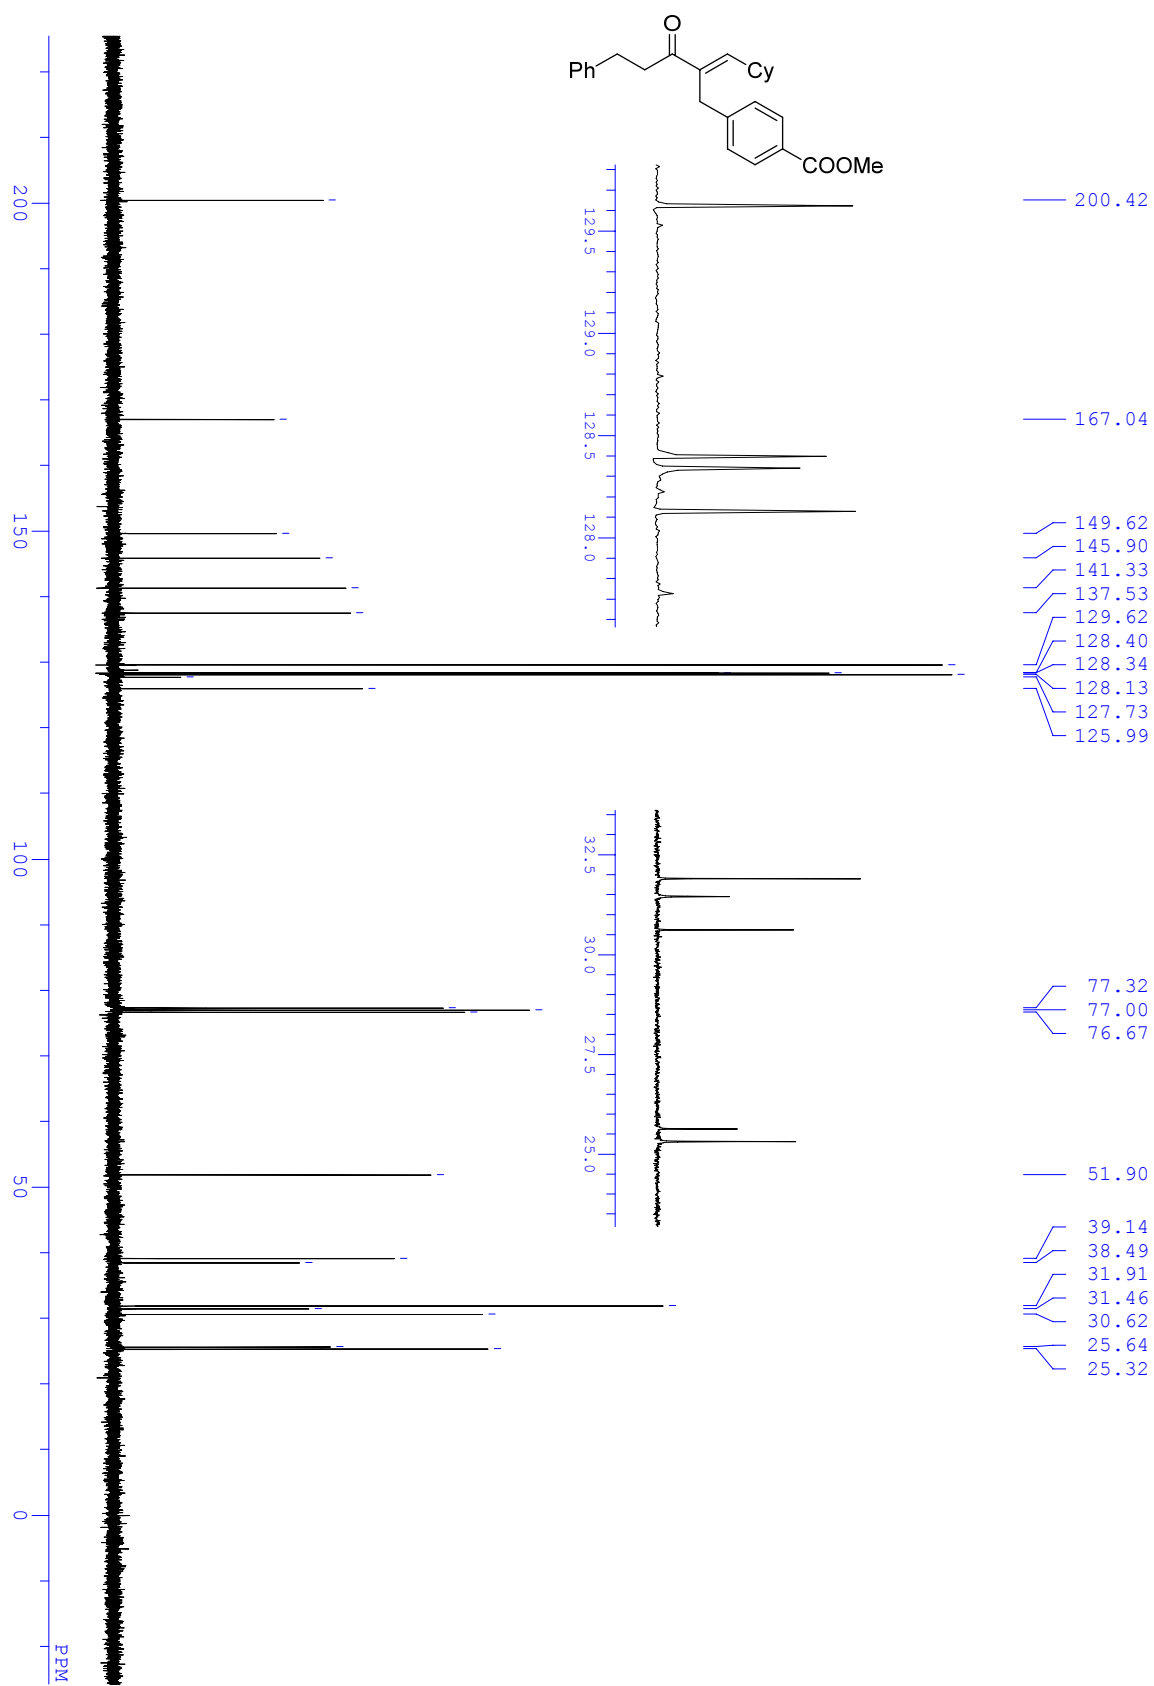

<sup>1</sup>H NMR spectrum of 4w

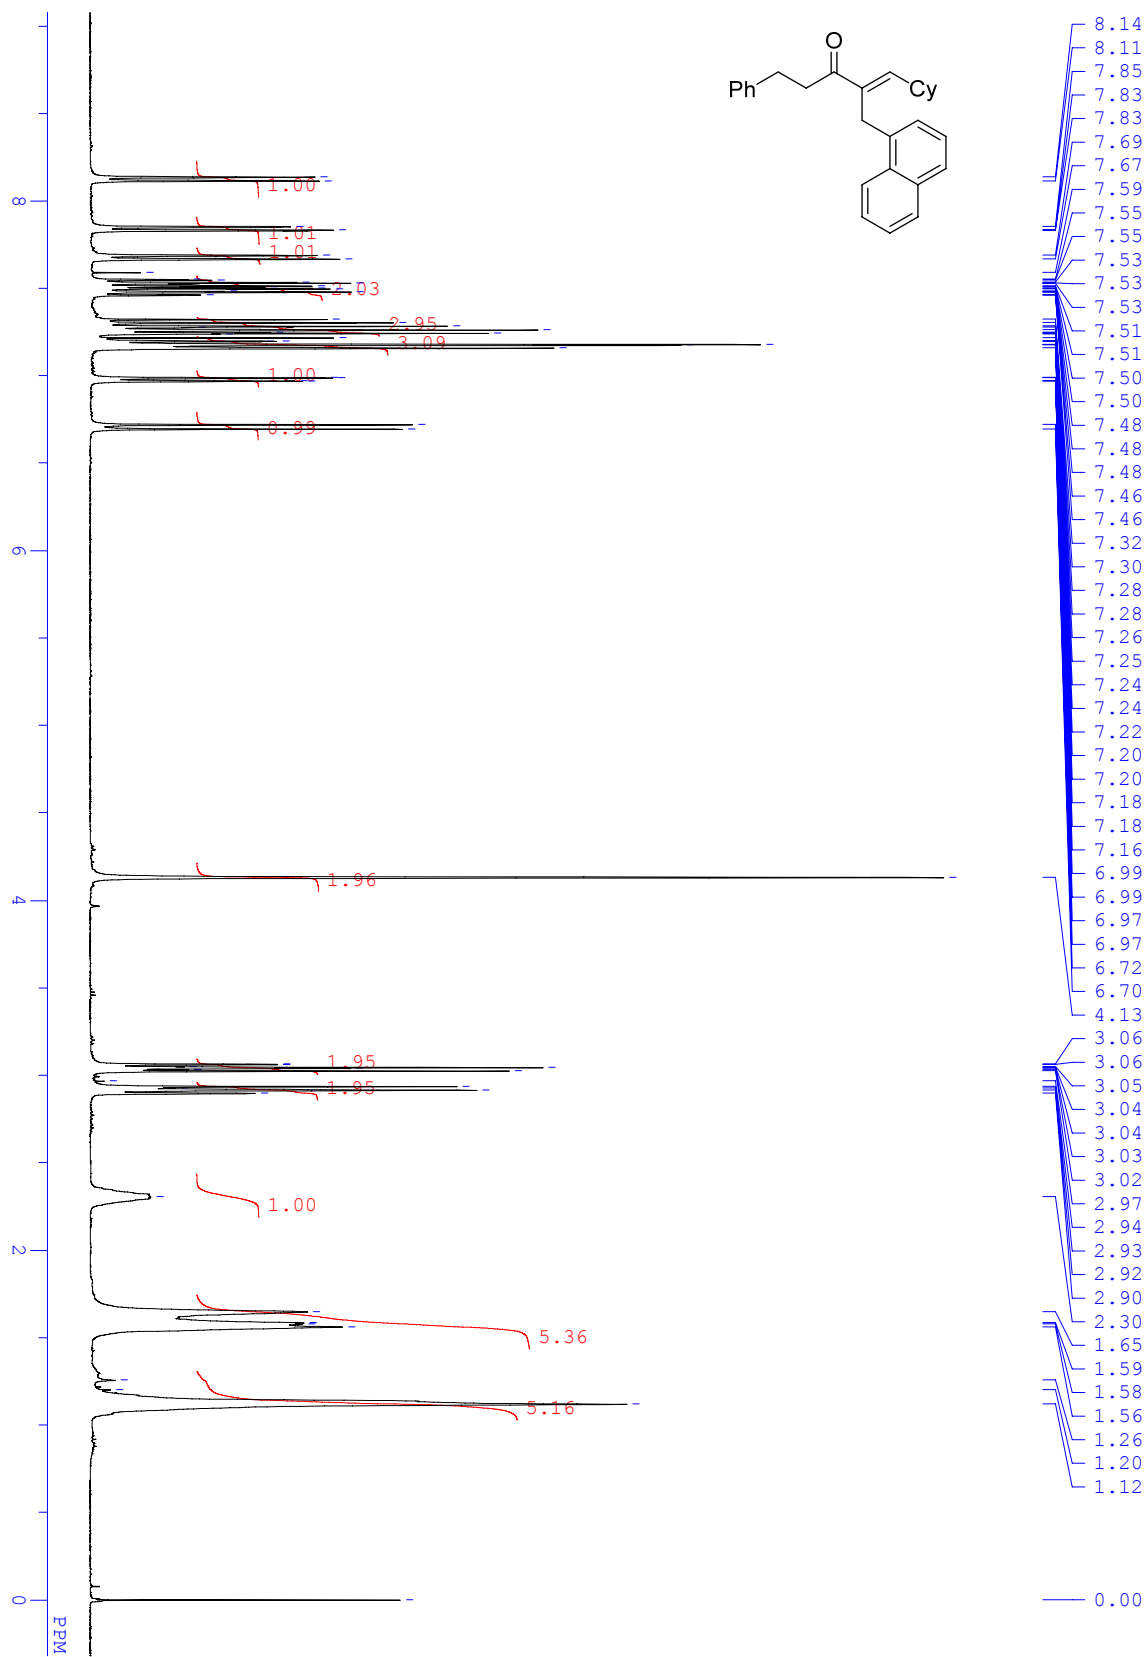

$^{13}\text{C} \{^1\text{H}\}$  NMR spectrum of **4w**

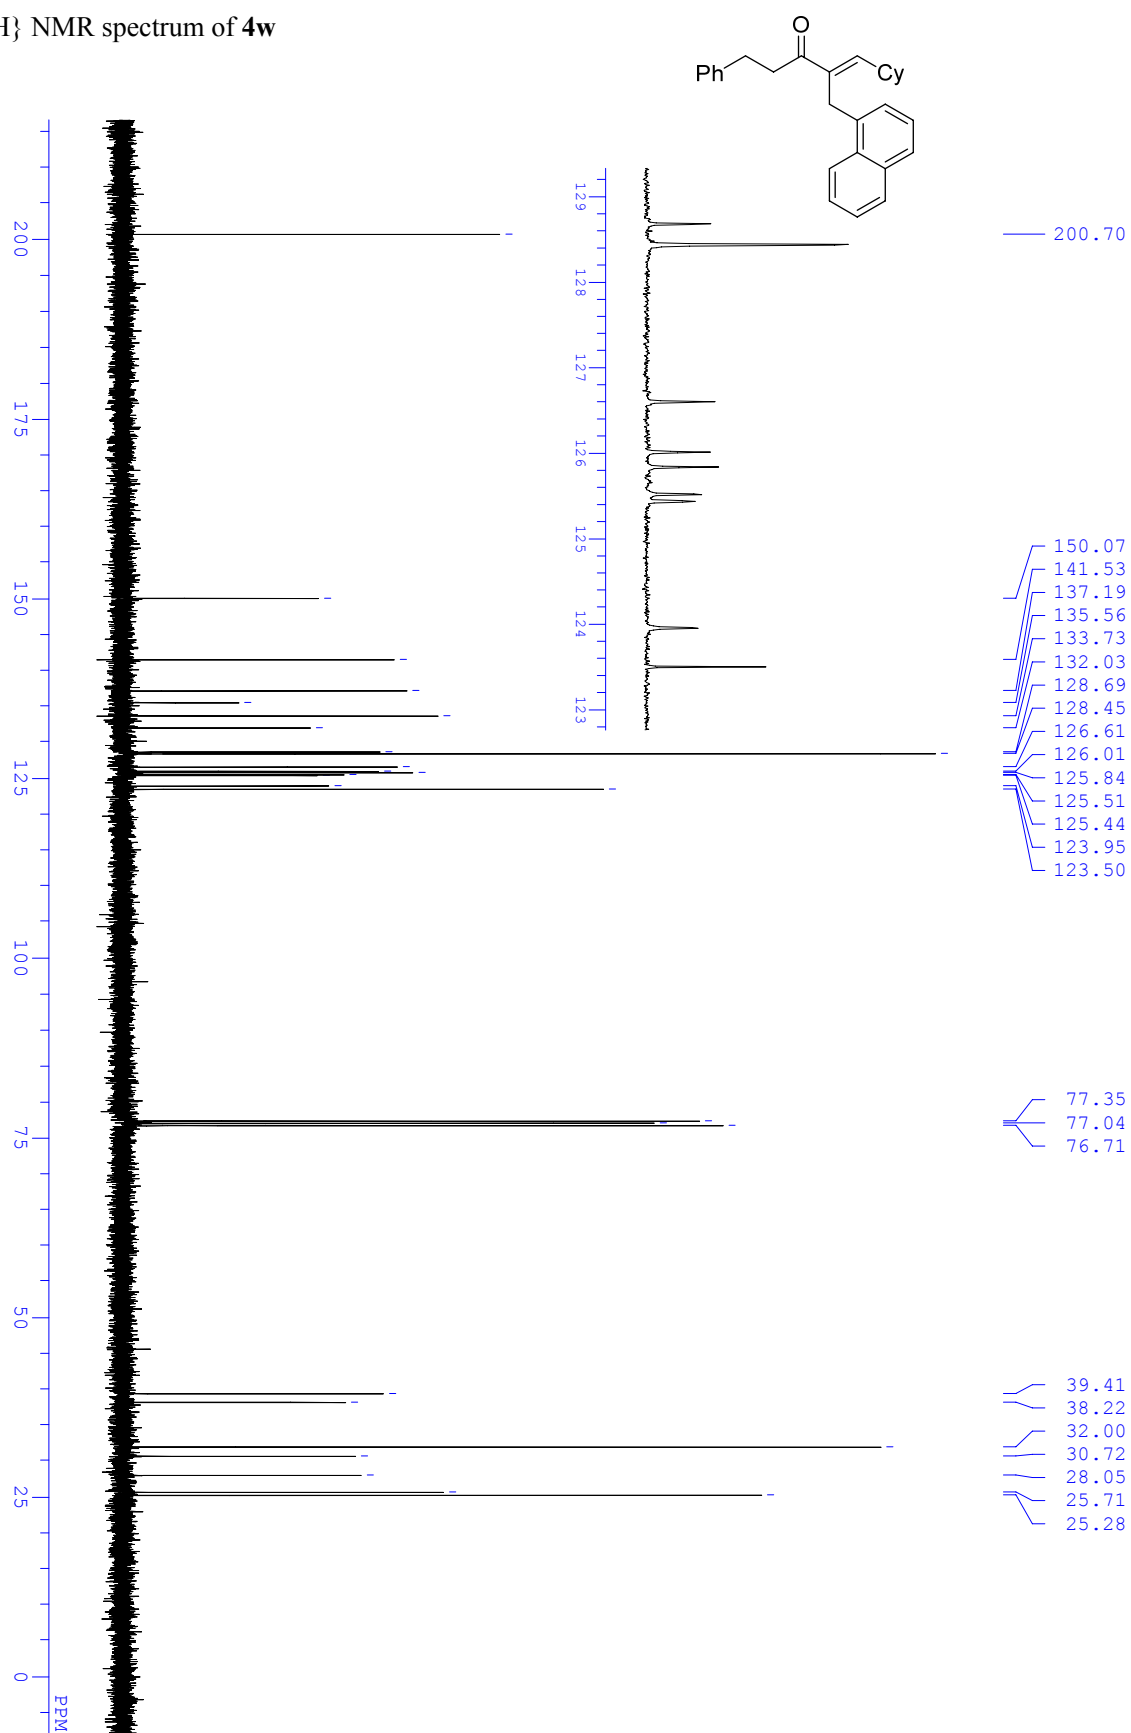



noesy spectrum of 4a

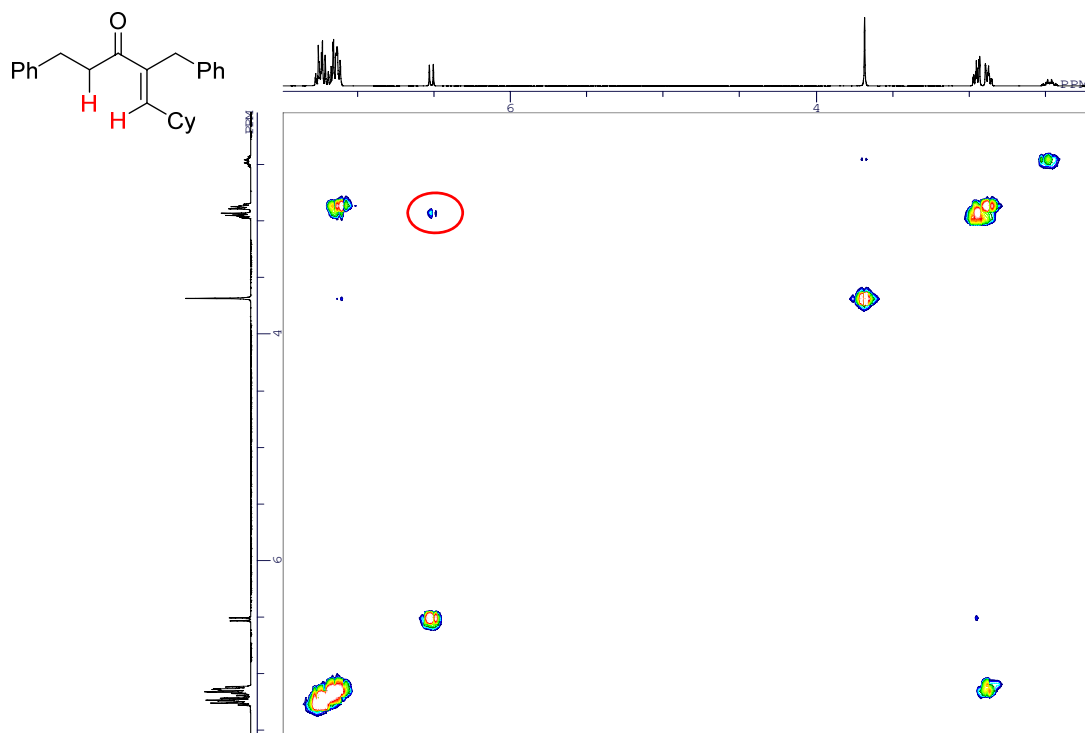

noesy spectrum of 4g

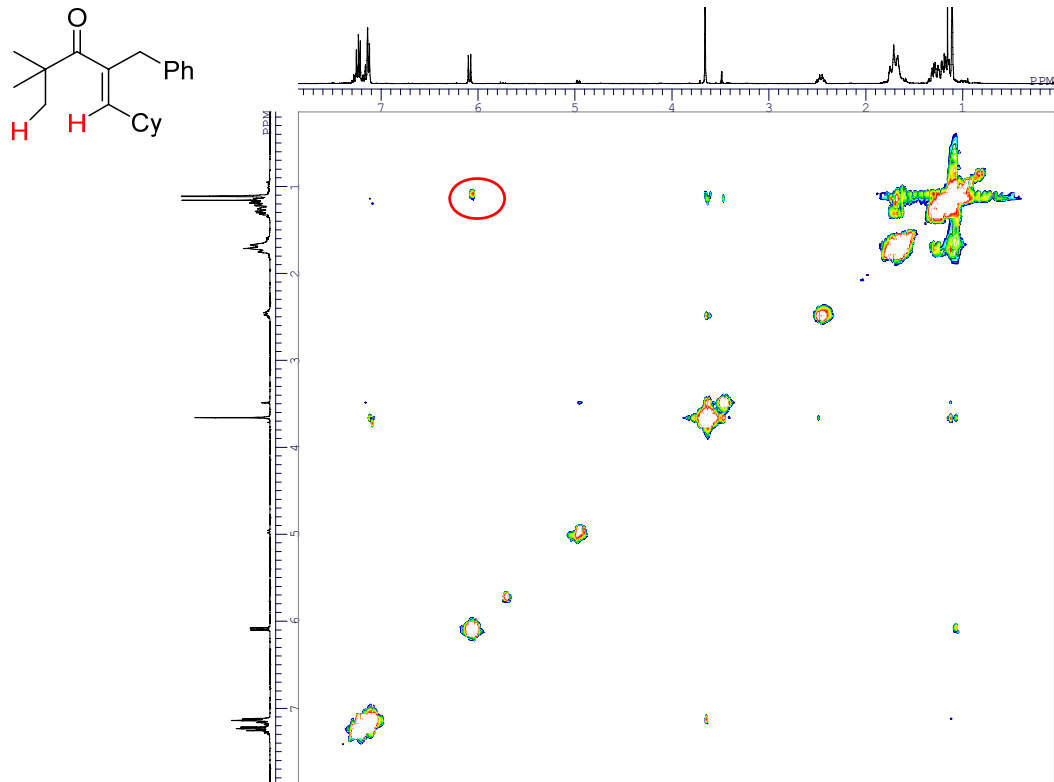

noesy spectrum of **4h**

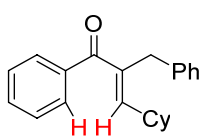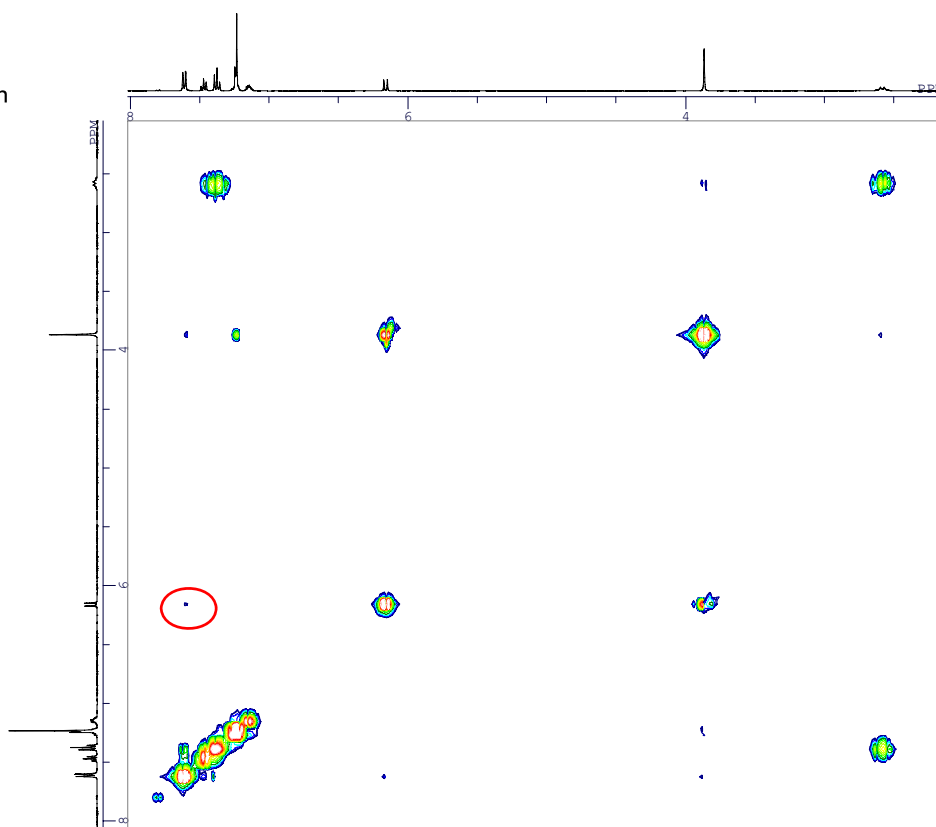

noesy spectrum of **4n**

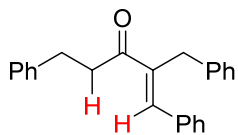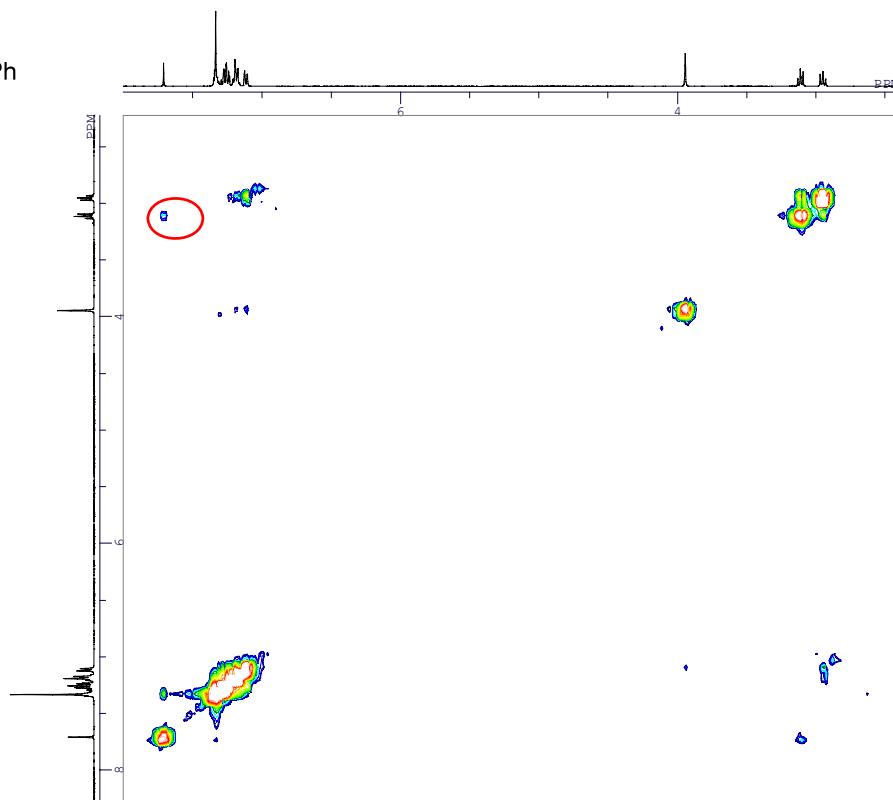

noesy spectrum of 4x

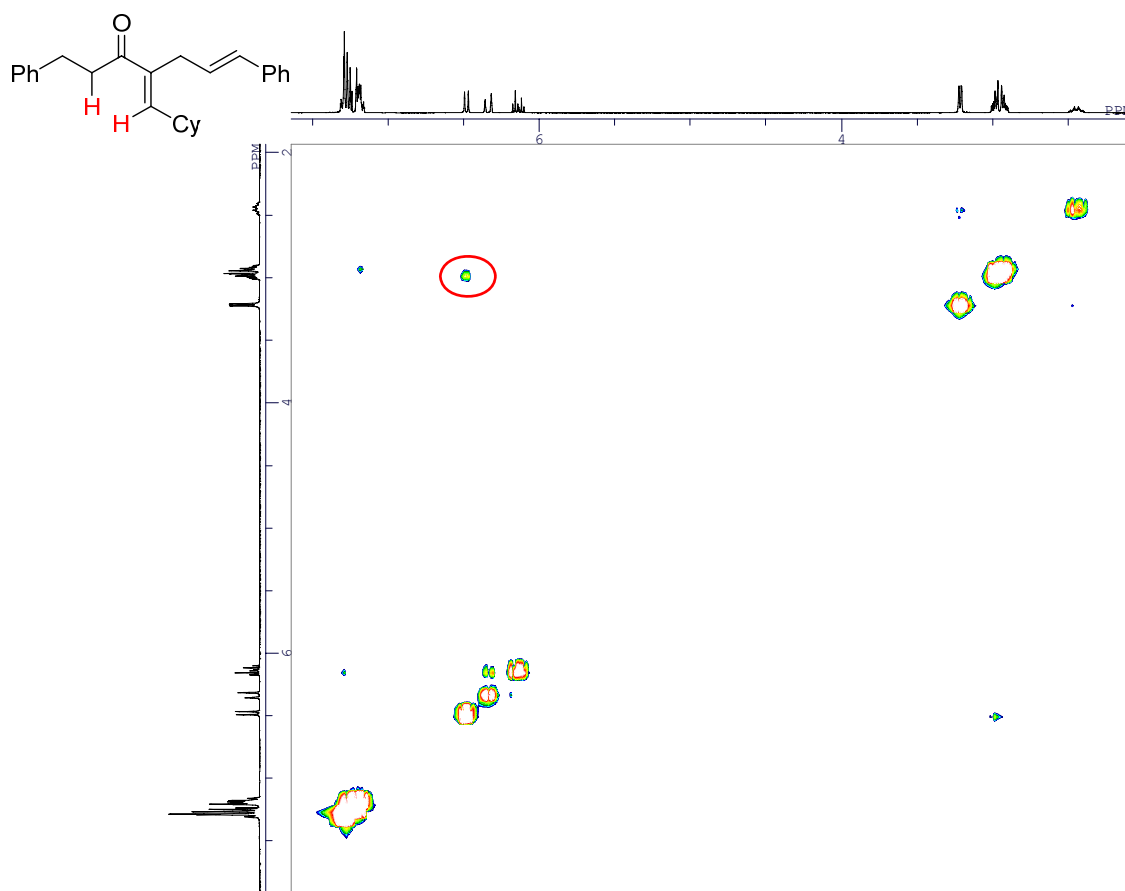

## 6. Reference

- (1) W. L. F. Armargo and C. L. L. Chai, *Purification of Laboratory Chemicals, 5th Ed.*; Burrewerth-Heinemann: Oxford. U. K., **2003**.
- (2) A. B. Pangbon, M. A. Giardello, R. H. Grubbs, R. K. Rosen and F. J. Timmers, *Organometallics*, 1996, **15**, 1518-1520.
- (3) T. Ukai, H. Kawazura and Y. Ishii, *J. Organomet. Chem.*, 1974, **65**, 253.
- (4) K. Semba, M. Shinomiya, T. Fujihara, J. Terao and Y. Tsuji, *Chem. Eur. J.*, 2013, **19**, 7125-7132.
- (5) T. Kippo, T. Fukuyama and I. Ryu, *Org. Lett.*, 2011, **13**, 3864-3867.
